# Supplementary material
Source: Royal Society of Chemistry journal article supplement (doi:10.1039/d6fo01259k)
Supplement: d6fo01259k1.pdf [file d6fo01259k1.pdf]

## SUPPLEMENTAL MATERIAL

|                                                                                                                                                                                                                    |    |
|--------------------------------------------------------------------------------------------------------------------------------------------------------------------------------------------------------------------|----|
| <b>SUPPLEMENTAL MATERIAL</b> .....                                                                                                                                                                                 | 1  |
| <b>Table S1.</b> Full FFQ instrument and portion size definitions .....                                                                                                                                            | 2  |
| <b>Table S2.</b> Description of main polyphenol source food groups: general food groups and 28 subgroups.....                                                                                                      | 5  |
| <b>Table S3.</b> Description of subclasses compounds and food sources.....                                                                                                                                         | 6  |
| <b>Table S4.</b> Phenol-Explorer item associated with each FFQ item.....                                                                                                                                           | 7  |
| <b>Table S5.</b> Characteristics of the OMIVECA urine sample study population (n = 200).....                                                                                                                       | 12 |
| <b>Table S6.</b> Intake of main PB foods (g/2,000kcal per day) by type of diet in the OMIVECA study (n = 792).....                                                                                                 | 13 |
| <b>Table S7.</b> Post-hoc analyses: intake of main PB foods by type of diet in the OMIVECA study (n = 792).....                                                                                                    | 14 |
| <b>Table S8.</b> Post-hoc analyses: Intake of main polyphenol subclasses (mg/2,000kcal per day) by type of diet in the OMIVECA study (n = 792).....                                                                | 15 |
| <b>Table S9.</b> Polyphenol's food contributions to total polyphenols intake by type of diet in the OMIVECA study (n = 792).....                                                                                   | 16 |
| <b>Table S10.</b> Post-hoc analyses: Polyphenol's food contributions to total polyphenols intake by type of diet in the OMIVECA study (n = 792).....                                                               | 17 |
| <b>Table S11.</b> Post-hoc analyses: Urine polyphenol values (ng/mL) by type of diet in the urine sample study population (n = 200).....                                                                           | 18 |
| <b>Table S12.</b> Urine biomarkers with missing values greater than 10% in the urine sample study population (n = 200).....                                                                                        | 19 |
| <b>Table S13.</b> Factor loadings of the first three components of the PCA in the urine sample study population (n = 200).....                                                                                     | 20 |
| <b>Table S14.</b> Type of diet and urine polyphenol values by cluster of the PCA in the urine sample study population (n = 200).....                                                                               | 21 |
| <b>Table S15.</b> Post-hoc: urine polyphenol values by cluster of the PCA in the urine sample study population (n = 200).....                                                                                      | 22 |
| <b>Table S16.</b> Polyphenol intake of metabolites with urine values among the overall study population (n = 792) and the participants with urinary samples (n = 200).....                                         | 23 |
| <b>Table S17.</b> Post-hoc analyses: Polyphenol intake of metabolites with urine values among the overall study population (n = 792) and the participants with urinary samples (n = 200).....                      | 24 |
| <b>Table S18.</b> Dietary scores values by type of diet.....                                                                                                                                                       | 25 |
| <b>Table S19.</b> Geometric means of polyphenol subclasses intake (per 2000 kcal/day) adjusted for age and sex in the OMIVECA study population (n = 792).....                                                      | 26 |
| <b>Table S20.</b> Post-hoc analyses of geometric means of urinary polyphenols adjusted for batch in the urine sample study population (n = 200).....                                                               | 27 |
| <b>Table S21.</b> Energy-unadjusted dietary intake of main polyphenol classes and subclasses by type of diet in the OMIVECA study (n = 792).....                                                                   | 28 |
| <b>Table S22.</b> Dietary intake of main polyphenol classes and subclasses (mg/2,000kcal per day) by type of diet among females (n = 581).....                                                                     | 29 |
| <b>Table S23.</b> Dietary intake of main polyphenol classes and subclasses (mg/2,000kcal per day) by type of diet among participants older than 24 years (n = 299).....                                            | 30 |
| <b>Table S24.</b> Dietary intake of main polyphenol classes and subclasses (mg/2,000kcal per day) by type of diet among participants of nutrition-related fields (n = 369).....                                    | 31 |
| <b>Table S25.</b> Food groups contributions (%) to total polyphenols when coffee portion size is equal to 175 mL.....                                                                                              | 32 |
| <b>Table S26.</b> Urine (poly)phenol concentrations (ng/mL) by type of diet in the urine subsample population restricted to participants not consuming polyphenol-containing (poly)phenol-supplements (n=175)..... | 33 |
| <b>Table S27.</b> Urine (poly)phenol concentrations (ng/mL) by type of diet excluding the participants with metabolite concentration lower than LLOQ.....                                                          | 34 |
| <b>Table S28.</b> Urine (poly)phenol concentrations (ng/mL) by type of diet substituting the participants with metabolite concentration lower than LLOQ by $LLOQ/\sqrt{2}$ .....                                   | 35 |
| <b>Figure S1.</b> Number of clusters selection graph: silhouette method.....                                                                                                                                       | 36 |
| <b>Figure S2.</b> Number of clusters selection graph: elbow method.....                                                                                                                                            | 36 |
| <b>Figure S3.</b> Correlations between the intake of selected foods rich in polyphenols and urinary polyphenols (U) in the urine sample study population (n = 200).....                                            | 37 |

**Table S1.** Full FFQ instrument and portion size definitions

| FFQ item                                                             | Portion size specified in the FFQ     | Portion size used |
|----------------------------------------------------------------------|---------------------------------------|-------------------|
| Whole milk                                                           | 1 cup, 200 mL                         | 200 mL            |
| Semi-skimmed milk                                                    | 1 cup, 200 mL                         | 200 mL            |
| Skimmed milk                                                         | 1 cup, 200 mL                         | 200 mL            |
| Condensed milk                                                       | 1 tablespoon                          | 10 mL             |
| Cream                                                                | 1/2 cup                               | 100 mL            |
| Milkshakes                                                           | 1 glass, 200 mL                       | 200 mL            |
| Whole yogurt                                                         | 1 unit, 125 g                         | 125 g             |
| Skimmed yogurt                                                       | 1 unit, 125 g                         | 125 g             |
| Petit Suisse                                                         | 1 unit, 55 g                          | 55 g              |
| Curd / fresh cheese                                                  | 1/2 cup                               | 100 g             |
| Processed or cream cheese                                            | 1 portion, 25 g                       | 25 g              |
| Other cheeses (aged, semi-aged, Manchego, Edam, Emmental)            | 50 g                                  | 50 g              |
| Fresh cheese (Burgos or goat)                                        | 50 g                                  | 50 g              |
| Custard / flan / pudding                                             | 1 unit, 130 mL                        | 130 mL            |
| Ice cream                                                            | 1 cone/cup                            | 75 g              |
| Hen's egg                                                            | 1 unit                                | 60g               |
| Chicken or turkey with skin                                          | 1 serving, 100–150 g                  | 125 g             |
| Chicken or turkey without skin                                       | 1 serving, 100–150 g                  | 125 g             |
| Beef or veal                                                         | 1 serving, 100–150 g                  | 125 g             |
| Pork (excluding sausages, processed meats, bacon)                    | 1 serving, 100–150 g                  | 125 g             |
| Lamb or goat                                                         | 1 serving/piece, 100–150 g            | 125 g             |
| Rabbit or hare                                                       | 1 serving/piece, 100–150 g            | 125 g             |
| Liver (beef, pork, or chicken)                                       | 1 serving, 100–150 g                  | 125 g             |
| Pâté / foie gras                                                     | 25 g                                  | 25 g              |
| Other organ meats (brain, heart, sweetbreads)                        | 1 serving, 100–150 g                  | 125 g             |
| White fish (fresh/frozen: grouper, sole, sea bream, hake)            | 1 serving, 100–150 g                  | 125 g             |
| Oily fish (fresh/frozen: sardines, tuna, mackerel, salmon)           | 1 serving, 100–150 g                  | 125 g             |
| Salted fish (e.g., cod)                                              | 1 serving, 60 g dry                   | 60 g              |
| Shellfish (oysters, clams, mussels)                                  | 6 units                               | 80 g              |
| Squid, octopus, cuttlefish                                           | 1 serving, 200 g                      | 200 g             |
| Crustaceans (shrimp, prawns, langoustines)                           | 4–5 pieces, 200 g                     | 200 g             |
| Canned fish/seafood in water                                         | 1 unit, 50 g                          | 50 g              |
| Canned fish/seafood in oil                                           | 1 unit, 50 g                          | 50 g              |
| Bacon or pork belly                                                  | 50 g                                  | 50 g              |
| Processed meats (sausages, chorizo, blood sausage, mortadella, etc.) | 50 g                                  | 50 g              |
| Hamburger or meatballs                                               | (1 unit, 50 g) or meatballs (3 units) | 50 g              |
| Cooked ham                                                           | 1 slice, 30 g                         | 30 g              |
| Cured ham                                                            | 1 slice, 30 g                         | 30 g              |
| Croquettes, fritters, dumplings                                      | 1 serving, 3–5 units                  | 100 g             |
| Lasagna, cannelloni, meat pies                                       | 1 plate                               | 150 g             |
| Spinach or chard                                                     | 1 medium plate, 200 g                 | 200 g             |
| Cabbage, cauliflower, broccoli                                       | 1 medium plate, 200 g                 | 200 g             |
| Lettuce, endive, escarole                                            | 1 medium plate, 100 g                 | 100 g             |
| Raw tomato                                                           | 1 unit, 150 g                         | 150 g             |
| Onion                                                                | 1/2-unit, 50 g                        | 50 g              |
| Garlic                                                               | 1 clove                               | 5 g               |
| Carrot or pumpkin                                                    | 100 g                                 | 100 g             |
| Green beans                                                          | 1 plate, 200 g                        | 200 g             |
| Peas or broad beans                                                  | 1 plate, 150 g boiled                 | 150 g             |
| Eggplant, zucchini, cucumber                                         | 1 plate, 200 g                        | 200 g             |
| Peppers (red/green)                                                  | 150 g                                 | 150 g             |
| Other vegetables (artichoke, leek, celery)                           | 1 plate, 200 g                        | 200 g             |
| Asparagus                                                            | 1 plate, 200 g                        | 200 g             |
| Boiled corn                                                          | 1 plate or small can, 82 g            | 82 g              |
| Gazpacho                                                             | 1 glass, 200 g                        | 200 g             |
| Herbs/spices (parsley, thyme, bay leaf, oregano)                     | 1 pinch                               | 5 g               |
| Lentils                                                              | 1 plate, 150 g boiled                 | 150 g             |
| Beans (pinto, white, black)                                          | 1 plate, 150 g boiled                 | 150 g             |
| Chickpeas                                                            | 1 plate, 150 g boiled                 | 150 g             |
| Mushrooms                                                            | 1 plate, 200 g                        | 200 g             |
| Orange, grapefruit or two mandarins                                  | 1 unit / 1 unit / two units           | 175 g             |
| Banana                                                               | 1 unit                                | 175 g             |
| Apple or pear                                                        | 1 unit                                | 175 g             |
| Strawberries                                                         | 6 units, dessert plate                | 150 g             |
| Cherries, plums                                                      | 1 dessert plate                       | 150 g             |

|                                            |                          |        |
|--------------------------------------------|--------------------------|--------|
| Peach, apricot, nectarine                  | 1 unit                   | 175 g  |
| Watermelon                                 | 1 slice, 200–250 g       | 225 g  |
| Melon                                      | 1 slice, 200–250 g       | 225 g  |
| Kiwi                                       | 1 unit, 100 g            | 100 g  |
| Grapes                                     | 1 bunch or dessert plate | 150 g  |
| Berries (blueberries, raspberries)         | 100 g or dessert plate   | 100 g  |
| Olives                                     | 10 units                 | 40 g   |
| Fruit in syrup/juice                       | 2 units                  | 60 g   |
| Dates, dried figs, raisins, prunes         | 150 g                    | 150 g  |
| Almonds, peanuts, hazelnuts, pistachios    | 30 g                     | 30 g   |
| Walnuts                                    | 30 g                     | 30 g   |
| Avocado                                    | 1/2 unit or 50 g         | 50 g   |
| White bread / sliced bread                 | 3 slices, 75 g           | 75 g   |
| Wholegrain bread                           | 3 slices, 75 g           | 75 g   |
| Breakfast cereals                          | 30 g                     | 30 g   |
| Wholegrain cereals (muesli, oats, bran)    | 30 g                     | 30 g   |
| Fried potatoes                             | 1 serving, 150 g         | 150 g  |
| Boiled/roasted potatoes                    | 1 serving, 200 g         | 200 g  |
| White rice                                 | 60 g raw                 | 60 g   |
| Brown rice                                 | 60 g raw                 | 60 g   |
| Pasta (spaghetti, macaroni, etc.)          | 60 g raw                 | 60 g   |
| Wholegrain pasta                           | 60 g raw                 | 60 g   |
| Pizza                                      | 1 portion, 200 g         | 200 g  |
| Olive oil                                  | 1 tablespoon             | 10 mL  |
| Extra virgin olive oil                     | 1 tablespoon             | 10 mL  |
| Olive pomace oil                           | 1 tablespoon             | 10 mL  |
| Corn oil                                   | 1 tablespoon             | 10 mL  |
| Sunflower oil                              | 1 tablespoon             | 10 mL  |
| Soybean oil                                | 1 tablespoon             | 10 mL  |
| Margarine                                  | 12 g                     | 12 g   |
| Butter                                     | 12 g                     | 12 g   |
| Lard                                       | 10 g                     | 10 g   |
| Other fats/oils                            | 10 mL                    | 10 mL  |
| Maria-type biscuits                        | 4–6 units, 50 g          | 50 g   |
| Wholegrain biscuits                        | 4–6 units, 50 g          | 50 g   |
| Chocolate biscuits                         | 4 units, 50 g            | 50 g   |
| Homemade cakes/pastries                    | 50 g                     | 50 g   |
| Croissant, industrial pastries             | 1 unit, 50 g             | 50 g   |
| Donut                                      | 1 unit                   | 100 g  |
| Muffins                                    | 1–2 units, 100 g         | 100 g  |
| Cakes/pastries                             | 1 unit, 50 g             | 50 g   |
| Churros                                    | 1 serving, 100 g         | 100 g  |
| Chocolate/candies                          | 30 g                     | 30 g   |
| Dark chocolate                             | 1–2 squares              | 20 g   |
| Nougat                                     | 1/8 of a bar, 40 g       | 40 g   |
| Marzipan/Christmas sweets                  | 90 g                     | 90 g   |
| Jam                                        | 1 teaspoon               | 8 g    |
| Sugar                                      | 1 teaspoon               | 8 g    |
| Honey                                      | 1 teaspoon               | 8 g    |
| Cocoa powder/soluble cocoa                 | 1 dessert spoon          | 10 g   |
| Mayonnaise                                 | 1 tablespoon, 20 g       | 20 g   |
| Mustard                                    | 1 teaspoon               | 10 g   |
| Fried tomato sauce                         | 1 serving, 50 g          | 50 g   |
| Ketchup                                    | 1 teaspoon               | 10 g   |
| Spices (Tabasco, pepper, paprika)          | 1 pinch                  | 2 g    |
| Other spices (e.g., turmeric)              | 1 pinch                  | 2 g    |
| Potato chips                               | 1 bag, 50 g              | 50 g   |
| Other snacks (corn snacks, popcorn)        | 1 bag, 50 g              | 50 g   |
| Instant soups/creams                       | 1 plate                  | 150 g  |
| Salt                                       | 1 pinch                  | 2g     |
| Sugary soft drinks (cola, lemonade, tonic) | 1 bottle, 200 mL         | 200 mL |
| Low-calorie soft drinks                    | 1 bottle, 200 mL         | 200 mL |
| Fresh orange juice                         | 1 glass, 200 mL          | 200 mL |
| Other fresh fruit juices                   | 1 glass, 200 mL          | 200 mL |
| Bottled/canned fruit juice                 | 200 mL                   | 200 mL |
| Decaffeinated coffee                       | 1 cup, 50 mL             | 50 mL  |
| Coffee                                     | 1 cup, 50 mL             | 50 mL  |
| Tea                                        | 1 cup, 50 mL             | 50 mL  |
| Grape must                                 | 100 mL                   | 100 mL |
| Rosé wine                                  | 1 glass, 100 mL          | 100 mL |

|                                                                       |                      |        |
|-----------------------------------------------------------------------|----------------------|--------|
| Sweet wine                                                            | 1 glass, 50 mL       | 50 mL  |
| Young red wine                                                        | 1 glass, 100 mL      | 100 mL |
| Aged red wine                                                         | 1 glass, 100 mL      | 100 mL |
| White wine                                                            | 1 glass, 100 mL      | 100 mL |
| Sparkling wine                                                        | 1 glass, 100 mL      | 100 mL |
| Beer with alcohol                                                     | 1 mug, 330 mL        | 330 mL |
| Alcohol-free beer                                                     | 1 mug, 330 mL        | 330 mL |
| Liqueurs (anisetto, etc.)                                             | 1 cup, 50 mL         | 50 mL  |
| Spirits (whisky, vodka, gin, cognac, rum)                             | 1 cup, 50 mL         | 50 mL  |
| Tofu                                                                  | 1/2 block, 150 g     | 150 g  |
| Seitan                                                                | 2 fillets, 150–200 g | 175 g  |
| Tempeh                                                                | 1/2 block, 150 g     | 150 g  |
| Textured soy protein                                                  | 1/2 cup, 40 g        | 40 g   |
| Other textured proteins (e.g., pea)                                   | 1/2 cup, 40 g        | 40 g   |
| Quinoa                                                                | 60 g raw             | 60 g   |
| Couscous                                                              | 40 g                 | 40 g   |
| Seeds (sesame, chia, flax, hemp, poppy, sunflower)                    | 1 tablespoon, 10 g   | 10 g   |
| Soy-based dairy alternatives                                          | 1 yogurt/dessert     | 125 g  |
| Other plant-based dairy alternatives (oat, coconut)                   | 1 yogurt/dessert     | 125 g  |
| Kefir                                                                 | 1 glass, 200 mL      | 200 mL |
| Plant-based cheese alternative                                        | 40 g                 | 40 g   |
| Almond drink                                                          | 1 glass              | 200 mL |
| Soy drink                                                             | 1 glass              | 200 mL |
| Oat drink                                                             | 1 glass              | 200 mL |
| Other plant drinks (flax, coconut, hazelnut, hemp, rice)              | 1 glass              | 200 mL |
| Fruit/vegetable smoothies                                             | 1 glass              | 200 mL |
| Kombucha                                                              | 1 bottle             | 200 mL |
| Meat analogues (cereal-based, excluding soy)                          | 1 serving, 150 g     | 150 g  |
| Meat analogues (soy-based)                                            | 1 serving, 150 g     | 150 g  |
| Meat analogues (legume-based, excluding soy)                          | 1 serving, 150 g     | 150 g  |
| Seaweed                                                               | 10 g                 | 10 g   |
| Hummus                                                                | 30 g                 | 30 g   |
| Plant-based spreads (cheese-type)                                     | 30 g                 | 30 g   |
| Vegetable spreads/pâtés (olive, beetroot, mushroom, pepper, eggplant) | 30 g                 | 30 g   |
| Guacamole                                                             | 30 g                 | 30 g   |
| Vegan ice cream                                                       | 1 scoop, 75 g        | 75 g   |
| Vegan pastries                                                        | 100 g                | 100 g  |
| Vegan biscuits/cookies                                                | 40 g                 | 40 g   |
| Prepared vegan dishes (lasagna, cannelloni)                           | 1 serving            | 150 g  |
| Prepared vegan foods (croquettes, falafel)                            | 1 serving            | 125 g  |

**Table S2.** Description of main polyphenol source food groups: general food groups and 28 subgroups.

| General Foods Groups            | Groups' Components                                                                                                                                                                                                                                                                                                                                                                                                                                                                           |
|---------------------------------|----------------------------------------------------------------------------------------------------------------------------------------------------------------------------------------------------------------------------------------------------------------------------------------------------------------------------------------------------------------------------------------------------------------------------------------------------------------------------------------------|
| <b>VEGETABLES AND MUSHROOMS</b> | <b>POTATOES:</b> Boiled potatoes, fried potatoes<br><b>VEGETABLES:</b> Spinach/chard, cabbage/cauliflower/broccoli, garlic, onion, carrot/pumpkin, green beans, eggplant/cucumber/zucchini, peppers, artichoke/leek/celery, asparagus, lettuce/escarole/endives, tomato<br><b>MUSHROOMS:</b> Wild mushrooms/button mushrooms/etc.                                                                                                                                                            |
| <b>LEGUMES</b>                  | <b>LEGUMES:</b> Lentils, beans, chickpeas, peas/broad beans, hummus                                                                                                                                                                                                                                                                                                                                                                                                                          |
| <b>FRUITS</b>                   | <b>FRESH FRUITS:</b> Orange/lemon, banana, apple/pear, strawberries, cherries/plums, peach/apricot, watermelon, melon, kiwi, grapes, avocado, orange juice, natural fruit juice<br><b>BERRIES:</b> Berries<br><b>OTHER FRUITS:</b> dates/figs, olives                                                                                                                                                                                                                                        |
| <b>NUTS</b>                     | <b>NUTS:</b> Seeds, almonds/peanuts, walnuts                                                                                                                                                                                                                                                                                                                                                                                                                                                 |
| <b>CEREALS</b>                  | <b>WHOLE GRAIN CEREALS:</b> Whole grain breakfast cereals, whole wheat bread, quinoa, brown rice, whole wheat pasta<br><b>REFINED CEREALS:</b> Breakfast cereals, white rice, white bread, pasta, corn, couscous                                                                                                                                                                                                                                                                             |
| <b>BAKERY/PASTRIES</b>          | <b>OMNIVOROUS PASTRIES:</b> Chocolate cookies, pastries, croissant, donuts, muffins, cakes, churros, whole wheat cookies<br><b>VEGAN PASTRIES:</b> Vegan cookies/pastries, vegan baked goods                                                                                                                                                                                                                                                                                                 |
| <b>SUGARY ITEMS</b>             | <b>SUGAR DERIVATIVES:</b> Soluble cocoa, milk chocolate confectionery, bottled juices, jam, nougat                                                                                                                                                                                                                                                                                                                                                                                           |
| <b>DARK CHOCOLATE</b>           | <b>DARK CHOCOLATE:</b> Dark chocolate                                                                                                                                                                                                                                                                                                                                                                                                                                                        |
| <b>FATS</b>                     | <b>OLIVE OIL:</b> Extra virgin olive oil, olive oil, pomace olive oil<br><b>OTHER VEGETABLE FATS:</b> Sunflower oil, corn oil, soybean oil, other fats (coconut), margarine                                                                                                                                                                                                                                                                                                                  |
| <b>BEVERAGES</b>                | <b>COFFEE AND TEA:</b> Coffee, decaffeinated coffee, black tea, green tea, other infusions<br><b>KOMBUCHA:</b> Kombucha<br><b>PLANT-BASED ALTERNATIVE BEVERAGES:</b> Oat beverage, almond beverage, soy beverage, other plant-based beverages                                                                                                                                                                                                                                                |
| <b>ALCOHOL</b>                  | <b>WINES:</b> Young red wine, aged red wine, rosé, muscat, white wine, cava<br><b>BEER:</b> Beer, non-alcoholic beer<br><b>SPIRITS:</b> Aniseed liquors, distilled spirits                                                                                                                                                                                                                                                                                                                   |
| <b>SPICES</b>                   | <b>SPICES:</b> Parsley/thyme/bay leaf, spicy seasonings, turmeric, other spices (cumin, turmeric, etc.)                                                                                                                                                                                                                                                                                                                                                                                      |
| <b>VEGETARIAN/VEGAN FOODS</b>   | <b>PLANT-BASED ALTERNATIVE PROTEIN:</b> Tofu, seitan, tempeh, textured soy, other proteins, cereal-based meat, legume-based meat, soy meat<br><b>MEAT ANALOGUES:</b> Cereal-based meat, legume-based meat, soy meat<br><b>SPREADS:</b> Vegan pâtés, vegan spreadable cheese, hummus, guacamole<br><b>SMOOTHIES:</b> Vegetable/fruit smoothies<br><b>VEGAN DAIRY-LIKE FOODS:</b> Vegan cheese substitute, soy-based dairy alternatives, other plant-based dairy alternatives, Vegan ice cream |

**Table S3.** Description of subclasses compounds and food sources.

| Main groups           | Polyphenol subclasses        | Top 10 compounds                                                                                                                                                                                                                                                                                                          | Common food source                                                                                                                                 |
|-----------------------|------------------------------|---------------------------------------------------------------------------------------------------------------------------------------------------------------------------------------------------------------------------------------------------------------------------------------------------------------------------|----------------------------------------------------------------------------------------------------------------------------------------------------|
| <b>Flavonoids</b>     | Anthocyanins                 | Cyanidin 3-O-rutinoside, Malvidin 3-O-glucoside, Cyanidin 3-O-sophoroside, Pelargonidin 3-O-glucoside, Cyanidin 3-O-glucoside, Delphinidin 3-O-galactoside, Malvidin 3-O-galactoside, Malvidin 3-O-(6"-acetyl-glucoside-, Delphinidin 3-O-arabinoside, Delphinidin 3-O-glucoside                                          | Black elderberry, Bilberry, Black chokeberry, Black raspberry, Blackberry, Blackcurrant, Bog bilberry, Highbush blueberry, Lowbush blueberry, Plum |
| <b>Flavonoids</b>     | Chalcones                    | Xanthohumol, Butein                                                                                                                                                                                                                                                                                                       | Broad bean seed, Hops, Beer, Tomato, Lentils                                                                                                       |
| <b>Flavonoids</b>     | Dihydrochalcones             | 3-Hydroxyphloretin 2'-O-glucoside, 3-Hydroxyphloretin 2'-O-xylosyl-glucoside, Phloretin 2'-O-xylosyl-glucoside, Phloridzin, Phloretin                                                                                                                                                                                     | Apple, Apple cider, Pear, Quince, Medlar                                                                                                           |
| <b>Flavonoids</b>     | Dihydroflavonols             | Dihydromyricetin 3-O-rhamnoside, Dihydroquercetin 3-O-rhamnoside, Dihydroquercetin                                                                                                                                                                                                                                        | Wine Red, Wine White, Wine Rosé, Champagne, Grape Black, Grape Green                                                                               |
| <b>Flavonoids</b>     | Flavanols                    | Polymers (>10 mers), 04-06-mers, 07-10-mers, 02-mers, 03-mers, (-)-Epicatechin, Procyanidin dimer B2, (+)-Catechin, Procyanidin dimer B1, Cinnamtannin A2                                                                                                                                                                 | Dark chocolate, Tea Black, Tea Green, Wine Red, Apples, Red wine, Plum, Peach                                                                      |
| <b>Flavonoids</b>     | Flavanones                   | Naringenin, Hesperetin, Hesperidin, Narirutin, Didymin, Naringin, Eriocitrin, Naringin-4-O-glucoside, Naringenin-7-O-glucoside, Poncirin                                                                                                                                                                                  | Grapefruit, Lemon, Orange Blood, Lime, Tomato Cherry, Pomegranate                                                                                  |
| <b>Flavonoids</b>     | Flavones                     | Luteolin, Apigenin, Luteolin-7-O--2-apsiosyl-6-malonyl--glucoside, Chrysoeriol-7-O--6-malonyl-apsiosyl-glucoside-, Apigenin-7-O--6-malonyl-apsiosyl-glucoside-, Apigenin-7-O-apsiosyl-glucoside, Luteolin-7-O-glucoside, Luteolin-7-O-glucuronide, Chrysoeriol-7-O-apsiosyl-glucoside, Apigenin-7-O-glucuronide           | Parsley fresh, Celery leaves, Marjoram dried, Thyme common, Oregano fresh, Sage common, Mint, Thyme fresh                                          |
| <b>Flavonoids</b>     | Flavonols                    | Quercetin 3-O-rutinoside, Quercetin-3-4-O-diglucoside, Myricetin, Quercetin, Quercetin-4-O-glucoside, 5,4'-Dihydroxy-3,3'-dimethoxy-6:7-methylenedioxyflavone 4'-O-glucuronide, Kaempferol 3-O-glucuronide, Kaempferol 3-O-glucoside, Quercetin 3-O-galactoside, Patuletin 3-O-glucosyl-(1->6)-[apsiosyl(1->2)]-glucoside | Capers, Olive Black, Asparagus, Buckwheat whole grain flour, Tea Black, Raspberry Black, Tea Black infusion                                        |
| <b>Flavonoids</b>     | Isoflavonoids                | Genistin, Daidzin, 6"-O-Malonylgenistin, 6"-O-Malonyldaidzin, 6"-O-Acetylgenistin, Genistein, Daidzein, Glycitin, 6"-O-Malonylglycitin, 6"-O-Acetyldaidzin                                                                                                                                                                | Soy milk, Soy seeds, Tofu soft, Tempeh, Miso, Soybean raw, Lentils, Chickpeas                                                                      |
| <b>Lignans</b>        | Lignans                      | Lariciresinol, Pinoresinol, Sesamin, Secoisolariciresinol, Sesamol, Sesaminol, Arctigenin, Isolariciresinol, Episesamin, Matairesinol                                                                                                                                                                                     | Flaxseeds, Sesame seeds, Broccoli, Carrots, Rye bread, Cereals, Vegetables                                                                         |
| <b>Other</b>          | Alkylmethoxyphenols          | 4-Vinylguaiacol, 4-Ethylguaiacol, 4-Vinylsyringol                                                                                                                                                                                                                                                                         | Coffee filter, Coffee espresso, Red wine                                                                                                           |
| <b>Other</b>          | Alkylphenols                 | 5-Heneicosylresorcinol, 5-Nonadecylresorcinol, 5-Heptadecylresorcinol, 5-Tricosylresorcinol, 5-Pentacosylresorcinol, 5-Heneicosenylresorcinol, 5-Nonadecenylresorcinol, 5-Tricosenylresorcinol, 5-Pentacosenylresorcinol, 4-Ethylcatechol                                                                                 | Rye bread, Wheat cereals, Oats, Barley                                                                                                             |
| <b>Other</b>          | Curcuminoids                 | Bisdemethoxycurcumin, Curcumin, Demethoxycurcumin                                                                                                                                                                                                                                                                         | Turmeric dried, Curry powder                                                                                                                       |
| <b>Other</b>          | Furanocoumarins              | Bergapten, Isopimpinellin, Psoralen, Xanthotoxin                                                                                                                                                                                                                                                                          | Parsley fresh, Grapefruit, Lime juice, Celery, Carrot                                                                                              |
| <b>Other</b>          | Hydroxybenzaldehydes         | Vanillin, Syringaldehyde, Protocatechuic aldehyde, 4-Hydroxybenzaldehyde, p-Anisaldehyde, Gallic aldehyde                                                                                                                                                                                                                 | Vanilla, Sherry, Rum, Cognac, Whisky, Beer, Vinegar                                                                                                |
| <b>Other</b>          | Hydroxyphenylpropenes        | Anethole, 2-Methoxy-5-prop-1-enylphenol, Acetyl eugenol, Estragole, Eugenol, [6]-Gingerol                                                                                                                                                                                                                                 | Star anise, Fennel, Oregano Mexican dried, Clove                                                                                                   |
| <b>Other</b>          | Methoxyphenols               | Guaiacol                                                                                                                                                                                                                                                                                                                  | Coffee, Olive oil, Olives                                                                                                                          |
| <b>Other</b>          | Naphthoquinones              | 1,4-Naphthoquinone, Juglone                                                                                                                                                                                                                                                                                               | Walnut dehulled, Walnut liquor                                                                                                                     |
| <b>Other</b>          | Other polyphenols            | Catechol, Pyrogallol, Phenol, Arbutin, Phlorin, Coumestrol, 3,4-Dihydroxyphenylglycol                                                                                                                                                                                                                                     | Coffee, Cocoa powder, Beer, Red wine                                                                                                               |
| <b>Other</b>          | Phenolic terpenes            | Carnosic acid, Rosmanol, Carnosol, Carvacrol, Epirosmanol, Rosmadiol, Thymol                                                                                                                                                                                                                                              | Rosemary fresh, Sage fresh, Thyme common, Oregano, Marjoram                                                                                        |
| <b>Other</b>          | Tyrosols                     | Oleuropein-aglycone, Oleuropein, Hydroxytyrosol, 3-4-DHPEA-EDA, 3-4-DHPEA-EA, p-HPEA-EDA, Demethyloleuropein, Tyrosol, p-HPEA-EA, Ligstroside-aglycone                                                                                                                                                                    | Olive oil extra virgin, Olive Black, Olive oil virgin, Red wine, Beer                                                                              |
| <b>Other</b>          | Hydroxycinnamaldehydes       | Ferulaldehyde, Sinapaldehyde                                                                                                                                                                                                                                                                                              | Cereals, Legumes, Seeds, Nuts                                                                                                                      |
| <b>Other</b>          | Hydroxycoumarins             | 4-Hydroxycoumarin, Esculetin, Esculin, Scopoletin, Umbelliferone, Mellein, Coumarin                                                                                                                                                                                                                                       | Vegetables, Citrus, Carrots, Fennel, Parsley                                                                                                       |
| <b>Phenolic acids</b> | Hydroxybenzoic acids         | Gallic-acid, Sanguiin-H-6, Syringic-acid, Lambertianin-C, Ellagic-acid, Protocatechuic-acid, 5-O-Galloylquinic-acid, 4-Hydroxybenzoic-acid, Vanillic-acid, Gentisic-acid                                                                                                                                                  | Tea Black, Tea Green, Coffee, Blueberries, Apples, Red wine                                                                                        |
| <b>Phenolic acids</b> | Hydroxybenzoketones          | 2,3-Dihydroxy-1-guaiacylpropanone, 3-Methoxyacetophenone                                                                                                                                                                                                                                                                  | Raspberry, Blackberry                                                                                                                              |
| <b>Phenolic acids</b> | Hydroxycinnamic acids        | 5-Caffeoylquinic-acid, 3-Caffeoylquinic-acid, 4-Caffeoylquinic-acid, Rosmarinic-acid, Ferulic-acid, Verbascoside, 5-Feruloylquinic-acid, Sinapic-acid, 4-Feruloylquinic-acid, o-Coumaric-acid                                                                                                                             | Coffee, Potatoes, Broccoli, Artichokes, Eggplant, Seeds                                                                                            |
| <b>Phenolic acids</b> | Hydroxyphenylacetic acids    | 4-Hydroxyphenylacetic acid, Homovanillic acid, 3,4-Dihydroxyphenylacetic acid, Homoveratric acid, Methoxyphenylacetic acid                                                                                                                                                                                                | Olive Black, Beer                                                                                                                                  |
| <b>Phenolic acids</b> | Hydroxyphenylpropanoic acids | Dihydro-p-coumaric acid, Dihydrocaffeic acid                                                                                                                                                                                                                                                                              | Coffee, Green tea, Fruits, Wine, Olives                                                                                                            |
| <b>Stilbenes</b>      | Stilbenes                    | Pinosylvin, Resveratrol, Resveratrol 3-O-glucoside, d-Viniferin, e-Viniferin, Pallidol, Piceatannol, Piceatannol 3-O-glucoside, Pterostilbene, Resveratrol 5-O-glucoside                                                                                                                                                  | Wine, Grape Black, Strawberry, Bilberry, Redcurrant, Peanut, Dark chocolate                                                                        |

**Table S4.** Phenol-Explorer item associated with each FFQ item.

| Phenol-Explorer Food item              | Food group                  | FFQ item                                        |
|----------------------------------------|-----------------------------|-------------------------------------------------|
| Wine [Red]                             | Alcoholic beverages         | Aged red wine                                   |
| Almond, milk 5%                        | Seeds                       | Almond beverage                                 |
| Almond                                 | Seeds                       | Almonds, penanuts, hazelIntus and/or pistachios |
| Hazelnut, raw                          | Seeds                       | Almonds, penanuts, hazelIntus and/or pistachios |
| Peanut                                 | Seeds                       | Almonds, penanuts, hazelIntus and/or pistachios |
| Pistachio                              | Seeds                       | Almonds, penanuts, hazelIntus and/or pistachios |
| Walnut, liquor                         | Alcoholic beverages         | Aniseed liquors                                 |
| Apple [Dessert], whole, raw            | Fruits and fruit products   | Apple/pear                                      |
| Celery leaves, fresh                   | Seasonings                  | Artichoke, leek and/or celery                   |
| Globe artichoke, heads, raw            | Vegetables                  | Artichoke, leek and/or celery                   |
| Asparagus, raw                         | Vegetables                  | Asparagus                                       |
| Avocado, raw                           | Vegetables                  | Avocado                                         |
| Banana, raw                            | Fruits and fruit products   | Banana                                          |
| Common bean [Black], whole, raw        | Seeds                       | Beans                                           |
| Common bean [Others], whole, raw       | Seeds                       | Beans                                           |
| Common bean [White], whole, raw        | Seeds                       | Beans                                           |
| Beer [Regular]                         | Alcoholic beverages         | Beer alcoholic                                  |
| Beer [Alcohol free]                    | Alcoholic beverages         | Beer non alcoholic                              |
| Highbush blueberry, raw                | Fruits and fruit products   | Berries                                         |
| Red raspberry, raw                     | Fruits and fruit products   | Berries                                         |
| Potato, raw                            | Vegetables                  | Boiled patatoes                                 |
| Apple [Cider], juice from concentrate  | Non-alcoholic beverages     | Bottled fruit juice                             |
| Orange [Blond], juice from concentrate | Non-alcoholic beverages     | Bottled fruit juice                             |
| Orange [Blood], juice from concentrate | Non-alcoholic beverages     | Bottled fruit juice                             |
| Rice, whole grain                      | Cereals and cereal products | Brown rice                                      |
| Hard wheat, refined flour 40%          | Cereals and cereal products | Cakes                                           |
| Sunflower seed, oil 20%                | Oils                        | Cakes                                           |
| Carrot, raw                            | Vegetables                  | Carrot/pumkin                                   |
| Pumpkin, raw                           | Vegetables                  | Carrot/pumkin                                   |
| Oat, refined flour 6%                  | Cereals and cereal products | Cereal based meat-alternative                   |
| Rice, whole grain 30%                  | Cereals and cereal products | Cereal based meat-alternative                   |
| Plum, fresh                            | Fruits and fruit products   | Cherries, picotas and/or plums                  |
| Sweet cherry, raw                      | Fruits and fruit products   | Cherries, picotas and/or plums                  |
| Chickpea, dehulled, raw                | Seeds                       | Chikpeas                                        |
| Chocolate, dark 10%                    | Coffee and cocoa            | Chocolate cookies                               |
| Hard wheat, refined flour 40%          | Cereals and cereal products | Chocolate cookies                               |
| Sunflower seed, oil 20%                | Oils                        | Chocolate cookies                               |
| Hard wheat, refined flour 40%          | Cereals and cereal products | Churros/porras                                  |
| Sunflower seed, oil 20%                | Oils                        | Churros/porras                                  |
| Broccoli, raw                          | Vegetables                  | Cabbage, cauliflower and/or broccoli            |
| Cauliflower, raw                       | Vegetables                  | Cabbage, cauliflower and/or broccoli            |
| Common cabbage [Green], raw            | Vegetables                  | Cabbage, cauliflower and/or broccoli            |
| Coffee beverage [Filter]               | Non-alcoholic beverages     | Coffee                                          |

|                                         |                             |                                      |
|-----------------------------------------|-----------------------------|--------------------------------------|
| Maize, bran oil                         | Oils                        | Corn oil                             |
| Hard wheat, semolina                    | Cereals and cereal products | Couscous                             |
| Hard wheat, refined flour 40%           | Cereals and cereal products | Croissant/ensaimada                  |
| Sunflower seed, oil 20%                 | Oils                        | Croissant/ensaimada                  |
| Chocolate, dark                         | Coffee and cocoa            | Dark chocolate                       |
| Coffee beverage [Filter], decaffeinated | Non-alcoholic beverages     | Decaffeinated coffee                 |
| Cognac                                  | Alcoholic beverages         | Distilled spirits                    |
| Rum                                     | Alcoholic beverages         | Distilled spirits                    |
| Scotch whisky                           | Alcoholic beverages         | Distilled spirits                    |
| Hard wheat, refined flour 40%           | Cereals and cereal products | Donuts                               |
| Sunflower seed, oil 20%                 | Oils                        | Donuts                               |
| Date, dried                             | Fruits and fruit products   | Dried dates, figs, raisins, prunes   |
| Fig, dried                              | Fruits and fruit products   | Dried dates, figs, raisins, prunes   |
| Grape, raisin                           | Fruits and fruit products   | Dried dates, figs, raisins, prunes   |
| Plum, prune                             | Fruits and fruit products   | Dried dates, figs, raisins, prunes   |
| Cucumber, raw                           | Vegetables                  | Eggplants, zucchini and/or cucumbers |
| Eggplant [Purple], whole, raw           | Vegetables                  | Eggplants, zucchini and/or cucumbers |
| Zucchini, raw                           | Vegetables                  | Eggplants, zucchini and/or cucumbers |
| Olive, oil, extra virgin                | Oils                        | Extra virgin olive oil               |
| Potato, raw                             | Vegetables                  | Fried potatoes                       |
| Garlic, fresh                           | Seasonings                  | Garlic                               |
| Olive, oil, extra virgin 10% Gazpacho   | Oils                        | Gazpacho                             |
| Tomato, whole, raw 70% gazpacho         | Vegetables                  | Gazpacho                             |
| Grape [Black], pure juice               | Non-alcoholic beverages     | Grape must                           |
| Grape [Green], pure juice               | Non-alcoholic beverages     | Grape must                           |
| Grape [Black]                           | Fruits and fruit products   | Grapes                               |
| Grape [Green]                           | Fruits and fruit products   | Grapes                               |
| Green bean, raw                         | Vegetables                  | Green beans                          |
| Avocado, raw Guacamole 70%              | Vegetables                  | Guacamole                            |
| Tomato, whole, raw Guacamole 20%        | Vegetables                  | Guacamole                            |
| Pepper spice [Black]                    | Seasonings                  | Hot spices                           |
| Pepper spice [Green]                    | Seasonings                  | Hot spices                           |
| Pepper spice [White]                    | Seasonings                  | Hot spices                           |
| Chickpea, dehulled, raw 90% hummus      | Seeds                       | Hummus                               |
| Olive, oil, extra virgin 5% Hummus      | Oils                        | Hummus                               |
| Apple [Dessert], jam                    | Fruits and fruit products   | Jams                                 |
| Apricot, jam                            | Fruits and fruit products   | Jams                                 |
| Blackberry, jam                         | Fruits and fruit products   | Jams                                 |
| Blackcurrant, jam                       | Fruits and fruit products   | Jams                                 |
| Lowbush blueberry, jam                  | Fruits and fruit products   | Jams                                 |
| Plum, jam                               | Fruits and fruit products   | Jams                                 |
| Quince, jam                             | Fruits and fruit products   | Jams                                 |
| Quince, peeled, jam                     | Fruits and fruit products   | Jams                                 |
| Red raspberry, jam                      | Fruits and fruit products   | Jams                                 |
| Sour cherry, jam                        | Fruits and fruit products   | Jams                                 |

|                                              |                             |                                        |
|----------------------------------------------|-----------------------------|----------------------------------------|
| Strawberry, jam                              | Fruits and fruit products   | Jams                                   |
| Sweet cherry, jam                            | Fruits and fruit products   | Jams                                   |
| Kiwi                                         | Fruits and fruit products   | Kiwi                                   |
| Tea [Black], infusion                        | Non-alcoholic beverages     | Kombucha                               |
| Chickpea, dehulled, raw 10%<br>alt_carne_leg | Seeds                       | Legume based meat-alternative          |
| Fresh pea, raw 10%                           | Vegetables                  | Legume based meat-alternative          |
| Lentils, whole, raw                          | Seeds                       | Lentils                                |
| Endive [Curly], raw                          | Vegetables                  | Lettuce, endives and/or escalore       |
| Endive [Escarole], raw                       | Vegetables                  | Lettuce, endives and/or escalore       |
| Lettuce [Green], raw                         | Vegetables                  | Lettuce, endives and/or escalore       |
| Maize, whole grain                           | Cereals and cereal products | Maize                                  |
| Hard wheat, refined flour 40%                | Cereals and cereal products | Maria biscuits                         |
| Sunflower seed, oil 20%                      | Oils                        | Maria biscuits                         |
| Melon                                        | Fruits and fruit products   | Melon                                  |
| Chocolate, milk                              | Coffee and cocoa            | Milk chocolate confectionery           |
| Muscadine grape, red wine                    | Alcoholic beverages         | Moscatel wine                          |
| Hard wheat, refined flour 40%                | Cereals and cereal products | Muffins                                |
| Sunflower seed, oil 20%                      | Oils                        | Muffins                                |
| Apple [Cider], pure juice                    | Non-alcoholic beverages     | Natural fruit juice                    |
| Apple [Dessert], juice from concentrate      | Non-alcoholic beverages     | Natural fruit juice                    |
| Apple [Dessert], pure juice                  | Non-alcoholic beverages     | Natural fruit juice                    |
| Grapefruit, juice from concentrate           | Non-alcoholic beverages     | Natural fruit juice                    |
| Grapefruit, pure juice                       | Non-alcoholic beverages     | Natural fruit juice                    |
| Lemon, juice from concentrate                | Non-alcoholic beverages     | Natural fruit juice                    |
| Pineapple, pure juice                        | Non-alcoholic beverages     | Natural fruit juice                    |
| Pummelo, pure juice                          | Non-alcoholic beverages     | Natural fruit juice                    |
| Tangerine, pure juice                        | Non-alcoholic beverages     | Natural fruit juice                    |
| Orange [Blond], pure juice                   | Non-alcoholic beverages     | Natural orange juice                   |
| Oat, whole grain flour (10%) milk            | Cereals and cereal products | Oat beverage                           |
| Olive, oil, virgin                           | Oils                        | Olive oil                              |
| Olive [Black], raw                           | Vegetables                  | Olives                                 |
| Olive [Green], raw                           | Vegetables                  | Olives                                 |
| Onion [Red], raw                             | Vegetables                  | Onion                                  |
| Onion [White], raw                           | Vegetables                  | Onion                                  |
| Onion [Yellow], raw                          | Vegetables                  | Onion                                  |
| Grapefruit                                   | Fruits and fruit products   | Orange, tangerine and/or grapefruit    |
| Orange [Blond]                               | Fruits and fruit products   | Orange, tangerine and/or grapefruit    |
| Tangerine                                    | Fruits and fruit products   | Orange, tangerine and/or grapefruit    |
| Rice, refined 15% milk                       | Cereals and cereal products | Other plant-based beverages            |
| Cumin                                        | Seasonings                  | Other spices                           |
| Curry, powder                                | Seasonings                  | Other spices                           |
| Turmeric, dried                              | Seasonings                  | Other spices                           |
| Fresh pea, raw otras protein                 | Vegetables                  | Other textured proteins                |
| Sesame seed, oil                             | Oils                        | Other vegetable fats                   |
| Parsley, dried                               | Seasonings                  | Parsley, thyme, bayleaf and/or oregano |
| Rosemary, dried                              | Seasonings                  | Parsley, thyme, bayleaf and/or oregano |

|                                   |                             |                                        |
|-----------------------------------|-----------------------------|----------------------------------------|
| Sweet basil, dried                | Seasonings                  | Parsley, thyme, bayleaf and/or oregano |
| Pasta                             | Cereals and cereal products | Pasta                                  |
| Hard wheat, refined flour 40%     | Cereals and cereal products | Pastries                               |
| Sunflower seed, oil 20%           | Oils                        | Pastries                               |
| Nectarine, whole                  | Fruits and fruit products   | Peach/apricot                          |
| Peach, whole                      | Fruits and fruit products   | Peach/apricot                          |
| Pear, whole                       | Fruits and fruit products   | Peach/apricot                          |
| Fresh pea, raw                    | Vegetables                  | Peas/broadbeans                        |
| Sweet pepper [Green], raw         | Vegetables                  | Peppers                                |
| Sweet pepper [Red], raw           | Vegetables                  | Peppers                                |
| Sweet pepper [Yellow], raw        | Vegetables                  | Peppers                                |
| Hard wheat, refined flour 30%     | Cereals and cereal products | Pizza                                  |
| Tomato, whole, raw 10%            | Vegetables                  | Pizza                                  |
| Olive, oil, refined               | Oils                        | Pomace olive oil                       |
| Tomato [Cherry], whole, raw       | Vegetables                  | Raw tomato                             |
| Tomato, whole, raw                | Vegetables                  | Raw tomato                             |
| Breakfast cereals, bran           | Cereals and cereal products | Refined cereals                        |
| Breakfast cereals, corn           | Cereals and cereal products | Refined cereals                        |
| Breakfast cereals, muesli         | Cereals and cereal products | Refined cereals                        |
| Wine [Rosé]                       | Alcoholic beverages         | Rosé wine                              |
| Sesame seed, meal                 | Seeds                       | Seeds                                  |
| Sunflower seed, meal              | Seeds                       | Seeds                                  |
| Cocoa, powder 40%                 | Coffee and cocoa            | Soluble cocoa                          |
| Soy, milk                         | Non-alcoholic beverages     | Soy beverage                           |
| Soy, burger, raw                  | Seeds                       | Soy meat-alternative                   |
| Soy, yogurt                       | Seeds                       | Soy-based dairy alternatives           |
| Soy, oil                          | Oils                        | Soybean oil                            |
| Champagne                         | Alcoholic beverages         | Sparkling wine                         |
| Collards, raw                     | Vegetables                  | Spinach/chard                          |
| Spinach, raw                      | Vegetables                  | Spinach/chard                          |
| Strawberry, raw                   | Fruits and fruit products   | Strawberries                           |
| Sunflower seed, oil               | Oils                        | Sunflower oil                          |
| Tea [Black], infusion             | Non-alcoholic beverages     | Tea                                    |
| Tea [Green], infusion             | Non-alcoholic beverages     | Tea                                    |
| Soy, tempe                        | Seeds                       | Tempeh                                 |
| Soy, meat                         | Seeds                       | Textured soy                           |
| Soy, tofu                         | Seeds                       | Tofu                                   |
| Tomato, whole, raw salsa 90%      | Vegetables                  | Tomato sauce                           |
| Almond 50%                        | Seeds                       | Turrón                                 |
| Hard wheat, refined flour 40%     | Cereals and cereal products | Vegan baked goods                      |
| Sunflower seed, oil 20%           | Oils                        | Vegan baked goods                      |
| Hard wheat, refined flour 40%     | Cereals and cereal products | Vegan cookies/pastries                 |
| Sunflower seed, oil 20%           | Oils                        | Vegan cookies/pastries                 |
| Eggplant [Purple], whole, raw 70% | Vegetables                  | Vegan pâtés                            |
| Banana, raw 30%                   | Fruits and fruit products   | Vegetable smoothies                    |

|                                        |                             |                     |
|----------------------------------------|-----------------------------|---------------------|
| Orange [Blond], pure juice 50%         | Non-alcoholic beverages     | Vegetable smoothies |
| Walnut                                 | Seeds                       | Walnuts             |
| Watermelon                             | Fruits and fruit products   | Watermelon          |
| Bread, refined flour                   | Cereals and cereal products | White bread         |
| Rice, refined                          | Cereals and cereal products | White rice          |
| Wine [White]                           | Alcoholic beverages         | White wine          |
| Bread, common wheat, whole grain flour | Cereals and cereal products | Whole wheat bread   |
| Bread, rye, whole grain flour          | Cereals and cereal products | Whole wheat bread   |
| Pasta, whole grain                     | Cereals and cereal products | Whole wheat pasta   |
| Breakfast cereals, oat, whole-meal     | Cereals and cereal products | Wholegrain cereals  |
| Hard wheat, whole grain flour          | Cereals and cereal products | Wholegrain cookies  |
| Wine [Red]                             | Alcoholic beverages         | Young red wine      |

**Table S5.** Characteristics of the OMIVECA urine sample study population (n = 200).

|                               | ALL<br>n=200     | OMN<br>n=98      | PVG<br>n=19      | PCV<br>n=16      | OVL<br>n=45      | VGN<br>n=22      | p-value             |
|-------------------------------|------------------|------------------|------------------|------------------|------------------|------------------|---------------------|
| Sex, female                   | 153 (76.5%)      | 68 (69.4%)       | 16 (84.2%)       | 16 (100.0%)      | 41 (91.1%)       | 12 (54.5%)       | 0.001 <sup>a</sup>  |
| Age, years                    | 25.0 [21.0;30.2] | 24.5 [21.0;29.0] | 32.0 [27.0;39.5] | 22.0 [20.8;27.2] | 23.0 [21.0;30.0] | 28.5 [22.0;38.2] | 0.030 <sup>b</sup>  |
| BMI, kg/m <sup>2</sup>        | 22.0 [20.5;24.3] | 22.4 [20.9;24.5] | 22.7 [20.5;25.7] | 20.2 [19.8;21.8] | 21.6 [20.1;23.4] | 22.9 [20.9;25.0] | 0.043 <sup>b</sup>  |
| Center                        |                  |                  |                  |                  |                  |                  | 0.599 <sup>c</sup>  |
| Granada                       | 145 (72.5%)      | 71 (72.4%)       | 14 (73.7%)       | 15 (93.8%)       | 32 (71.1%)       | 13 (59.1%)       |                     |
| Madrid                        | 28 (14.0%)       | 15 (15.3%)       | 2 (10.5%)        | 0 (0.0%)         | 8 (17.8%)        | 3 (13.6%)        |                     |
| Seville                       | 27 (13.5%)       | 12 (12.2%)       | 3 (15.8%)        | 1 (6.2%)         | 5 (11.1%)        | 6 (27.3%)        |                     |
| Alcohol intake                |                  |                  |                  |                  |                  |                  | 0.715 <sup>c</sup>  |
| Never                         | 109 (54.5%)      | 56 (57.1%)       | 7 (36.8%)        | 8 (50.0%)        | 23 (51.1%)       | 15 (68.2%)       |                     |
| Once /week                    | 60 (30.0%)       | 26 (26.5%)       | 8 (42.1%)        | 6 (37.5%)        | 15 (33.3%)       | 5 (22.7%)        |                     |
| ≥2/week                       | 31 (15.5%)       | 16 (16.3%)       | 4 (21.1%)        | 2 (12.5%)        | 7 (15.6%)        | 2 (9.1%)         |                     |
| Smoking status                |                  |                  |                  |                  |                  |                  | 0.196 <sup>c</sup>  |
| Never                         | 159 (79.5%)      | 82 (83.7%)       | 10 (52.6%)       | 13 (81.2%)       | 38 (84.4%)       | 16 (72.7%)       |                     |
| Former                        | 20 (10.0%)       | 9 (9.2%)         | 5 (26.3%)        | 1 (6.2%)         | 2 (4.4%)         | 3 (13.6%)        |                     |
| Currently                     | 21 (10.5%)       | 7 (7.1%)         | 4 (21.1%)        | 2 (12.5%)        | 5 (11.1%)        | 3 (13.6%)        |                     |
| Profession                    |                  |                  |                  |                  |                  |                  | 0.098 <sup>c</sup>  |
| Nutrition student/prof.       | 90 (45.0%)       | 43 (43.9%)       | 7 (36.8%)        | 7 (43.8%)        | 24 (53.3%)       | 9 (40.9%)        |                     |
| Health sciences student/prof. | 51 (25.5%)       | 32 (32.7%)       | 6 (31.6%)        | 5 (31.2%)        | 7 (15.6%)        | 1 (4.5%)         |                     |
| Other                         | 59 (29.5%)       | 23 (23.5%)       | 6 (31.6%)        | 4 (25.0%)        | 14 (31.1%)       | 12 (54.5%)       |                     |
| Supplements use               | 91 (45.5%)       | 22 (22.4%)       | 5 (26.3%)        | 6 (37.5%)        | 36 (80.0%)       | 22 (100.0%)      | <0.001 <sup>c</sup> |
| Vitamin B12                   | 63 (31.5%)       | 2 (2.0%)         | 0 (0.0%)         | 3 (18.8%)        | 36 (80.0%)       | 22 (100.0%)      | <0.001 <sup>c</sup> |
| Snacking                      |                  |                  |                  |                  |                  |                  | 0.613 <sup>a</sup>  |
| Yes                           | 75 (37.5%)       | 33 (33.7%)       | 7 (36.8%)        | 8 (50.0%)        | 16 (35.6%)       | 11 (50.0%)       |                     |
| No                            | 125 (62.5%)      | 65 (66.3%)       | 12 (63.2%)       | 8 (50.0%)        | 29 (64.4%)       | 11 (50.0%)       |                     |
| hPDI                          | 59.0 [51.0;67.0] | 51.5 [46.0;57.0] | 66.0 [65.0;68.5] | 60.5 [54.8;66.2] | 66.0 [58.0;69.0] | 71.0 [68.2;75.2] | <0.001 <sup>b</sup> |

<sup>a</sup> n (%) for categorical variables; p-value derived from Pearson Chi-square test.

<sup>b</sup> Median and interquartile range for continuous variables; p-value derived from Kruskal-Wallis test.

<sup>c</sup> n (%) for categorical variables; p-value derived from Fisher's exact test.

All p-values were corrected for multiple testing by Benjamini-Hochberg method.

Supplements non-exclusive options: iron, vitamin B12, other B vitamins, other vitamins and minerals, yeast, and omega-3.

OMN: omnivore; PVG: pro-vegetarian; PCV: pesco-vegetarian; OVL: ovo-lacto-vegetarian; VGN: vegan; BMI: Body mass index; hPDI: healthy pro-vegetarian diet index.

**Table S6.** Intake of main PB foods (g/2,000kcal per day) by type of diet in the OMIVECA study (n = 792).

|                           | <b>ALL<br/>n=792</b> | <b>OMN<br/>n=534</b> | <b>PVG<br/>n=92</b> | <b>PCV<br/>n=32</b> | <b>OVL<br/>n=75</b> | <b>VGN<br/>n=59</b> | <b>p-value</b> |
|---------------------------|----------------------|----------------------|---------------------|---------------------|---------------------|---------------------|----------------|
| Vegetables                | 327.5 (192.5)        | 281.7 (177.6)        | 431.7 (176.6)       | 390.3 (169.5)       | 376.1 (127.4)       | 483.6 (252.5)       | <0.001         |
| Mushrooms                 | 25.0 (30.7)          | 19.8 (27.9)          | 30.6 (30.2)         | 35.5 (35.6)         | 41.4 (39.8)         | 36.0 (27.3)         | <0.001         |
| Potatoes                  | 42.0 (30.5)          | 45.6 (31.0)          | 29.6 (30.6)         | 36.4 (26.0)         | 38.6 (26.3)         | 36.3 (27.0)         | <0.001         |
| Legumes                   | 75.5 (50.1)          | 62.9 (44.5)          | 82.6 (43.1)         | 94.4 (48.2)         | 102.2 (42.1)        | 134.4 (58.2)        | <0.001         |
| Fresh fruits              | 324.8 (223.3)        | 302.9 (222.0)        | 447.8 (230.9)       | 330.3 (139.0)       | 348.1 (218.1)       | 299.0 (205.8)       | <0.001         |
| Berries                   | 12.1 (22.3)          | 9.8 (16.8)           | 19.1 (31.7)         | 24.8 (53.2)         | 11.9 (16.1)         | 15.4 (24.0)         | 0.003          |
| Nuts                      | 18.5 (18.1)          | 14.4 (15.5)          | 27.2 (17.5)         | 19.9 (16.4)         | 20.9 (15.7)         | 38.0 (25.3)         | <0.001         |
| WG cereals                | 40.8 (39.9)          | 32.9 (36.8)          | 67.7 (46.2)         | 59.2 (39.8)         | 49.4 (38.6)         | 48.6 (32.7)         | <0.001         |
| Ref. cereals              | 64.1 (45.2)          | 73.1 (45.5)          | 40.6 (44.2)         | 50.6 (34.3)         | 50.7 (34.7)         | 43.8 (35.3)         | <0.001         |
| Total pastries            | 21.6 (22.7)          | 24.5 (24.7)          | 11.4 (12.0)         | 18.3 (21.2)         | 20.7 (19.4)         | 14.5 (14.0)         | <0.001         |
| Omnivorous pastries       | 20.5 (22.4)          | 24.2 (24.5)          | 11.2 (12.0)         | 16.9 (20.3)         | 17.5 (16.7)         | 7.8 (9.5)           | <0.001         |
| Vegan pastries            | 1.1 (4.7)            | 0.3 (3.7)            | 0.2 (1.0)           | 1.5 (3.5)           | 3.2 (6.3)           | 6.7 (8.2)           | <0.001         |
| Dark chocolate            | 4.0 (6.2)            | 3.2 (5.3)            | 6.8 (6.9)           | 6.2 (9.2)           | 5.2 (7.1)           | 4.2 (7.5)           | <0.001         |
| Sugar derivates           | 12.8 (28.1)          | 15.1 (28.5)          | 3.0 (4.1)           | 14.1 (50.9)         | 12.5 (31.8)         | 7.4 (18.7)          | <0.001         |
| Olive oil                 | 18.9 (12.6)          | 18.0 (12.4)          | 22.1 (12.6)         | 18.4 (11.6)         | 21.6 (12.8)         | 19.3 (14.1)         | 0.006          |
| Other vegetable fats      | 1.2 (2.9)            | 1.3 (3.0)            | 0.3 (1.0)           | 0.8 (2.0)           | 1.1 (2.1)           | 2.5 (3.7)           | <0.001         |
| Coffee & tea              | 55.5 (55.3)          | 46.6 (49.7)          | 86.3 (60.3)         | 77.2 (83.4)         | 69.4 (56.2)         | 59.0 (52.7)         | <0.001         |
| Kombucha                  | 2.4 (11.2)           | 1.1 (6.0)            | 7.1 (23.9)          | 1.8 (4.4)           | 3.0 (6.7)           | 6.7 (18.4)          | <0.001         |
| Bottled juices            | 7.3 (25.0)           | 8.8 (25.9)           | 0.4 (1.6)           | 8.7 (43.0)          | 6.2 (27.2)          | 4.6 (17.7)          | <0.001         |
| PB Alt. beverages         | 53.2 (109.9)         | 19.0 (56.6)          | 67.8 (111.3)        | 126.7 (149.8)       | 115.4 (139.2)       | 221.6 (176.8)       | <0.001         |
| Almond beverage           | 9.0 (45.3)           | 5.4 (29.1)           | 22.2 (69.9)         | 9.2 (28.9)          | 19.0 (93.1)         | 7.4 (23.1)          | <0.001         |
| Soy beverage              | 21.1 (58.5)          | 4.3 (19.5)           | 21.7 (58.5)         | 51.5 (81.6)         | 46.7 (81.2)         | 122.5 (107.0)       | <0.001         |
| Oat beverage              | 18.3 (61.3)          | 7.2 (37.7)           | 20.1 (65.0)         | 55.5 (115.2)        | 39.7 (74.5)         | 68.5 (111.3)        | <0.001         |
| Other PB beverages        | 4.9 (37.3)           | 2.0 (13.1)           | 3.8 (16.7)          | 10.5 (29.6)         | 10.0 (33.0)         | 23.1 (121.1)        | <0.001         |
| Wine                      | 6.8 (16.5)           | 6.1 (13.4)           | 10.1 (26.8)         | 9.5 (16.0)          | 7.9 (20.3)          | 5.5 (14.7)          | 0.279          |
| Beer                      | 38.2 (69.0)          | 35.0 (68.7)          | 42.3 (68.1)         | 42.8 (47.6)         | 55.1 (84.2)         | 36.8 (59.4)         | 0.113          |
| Spirits                   | 1.7 (3.7)            | 2.1 (4.0)            | 1.2 (3.9)           | 0.7 (1.5)           | 0.9 (1.8)           | 0.6 (1.5)           | <0.001         |
| Spices                    | 4.3 (4.3)            | 3.4 (3.6)            | 5.6 (4.6)           | 5.1 (3.7)           | 5.6 (3.6)           | 8.5 (6.8)           | <0.001         |
| Meat analogs              | 10.2 (24.1)          | 2.4 (7.4)            | 3.5 (8.1)           | 31.1 (36.6)         | 38.7 (36.5)         | 43.5 (43.1)         | <0.001         |
| PB Alt. protein           | 27.6 (56.8)          | 4.7 (11.9)           | 11.0 (16.0)         | 66.3 (65.4)         | 96.4 (63.7)         | 152.2 (82.6)        | <0.001         |
| Spreads                   | 5.7 (7.0)            | 4.3 (5.9)            | 6.3 (7.1)           | 6.5 (6.1)           | 10.3 (8.1)          | 11.0 (9.3)          | <0.001         |
| Smoothies                 | 5.6 (16.1)           | 4.6 (13.4)           | 6.3 (17.9)          | 1.9 (4.9)           | 8.0 (20.4)          | 12.3 (27.5)         | 0.055          |
| Vegan dairy-like products | 14.4 (33.5)          | 7.9 (25.8)           | 16.9 (33.1)         | 23.0 (40.0)         | 30.2 (46.3)         | 44.9 (46.7)         | <0.001         |

Adjusted intakes by 2,000 kcal: mean (standard deviation); p-value derived from Kruskal-Wallis test.

All p-values were corrected for multiple testing by Benjamini-Hochberg method.

OMN: omnivore; PVG: pro-vegetarian; PCV: pesco-vegetarian; OVL: ovo-lacto-vegetarian; VGN: vegan. WG: whole grain; Ref.: refined; PB: plant-based; alc.: alcoholic; Alt.: alternative.

**Table S7.** Post-hoc analyses: intake of main PB foods by type of diet in the OMIVECA study (n = 792).

|                           | OMN vs PVG   | OMN vs PCV   | OMN vs OVL   | OMN vs VGN   | PVG vs PCV   | PVG vs OVL   | PVG vs VGN   | PCV vs OVL   | PCV vs VGN   | OVL vs VGN   |
|---------------------------|--------------|--------------|--------------|--------------|--------------|--------------|--------------|--------------|--------------|--------------|
| Vegetables                | <0.001       | <0.001       | <0.001       | <0.001       | 0.198        | 0.052        | 0.539        | 0.989        | <b>0.052</b> | <b>0.014</b> |
| Mushrooms                 | <0.001       | <b>0.004</b> | <0.001       | <0.001       | 0.583        | 0.101        | 0.101        | 0.583        | 0.592        | 0.968        |
| Potatoes                  | <0.001       | 0.082        | 0.082        | 0.053        | 0.082        | <b>0.029</b> | 0.082        | 0.821        | 0.907        | 0.654        |
| Legumes                   | <0.001       | <0.001       | <0.001       | <0.001       | 0.254        | <b>0.002</b> | <0.001       | 0.388        | <b>0.002</b> | <b>0.002</b> |
| Fresh fruits              | <0.001       | 0.107        | 0.046        | 0.973        | <b>0.012</b> | <b>0.003</b> | <0.001       | 0.973        | 0.145        | 0.107        |
| Berries                   | <b>0.016</b> | 0.089        | 0.089        | 0.524        | 0.905        | 0.636        | 0.584        | 0.715        | 0.584        | 0.715        |
| Nuts                      | <0.001       | <b>0.036</b> | <0.001       | <0.001       | <b>0.026</b> | <b>0.018</b> | <b>0.007</b> | 0.718        | <0.001       | <0.001       |
| WG cereals                | <0.001       | <0.001       | <0.001       | <0.001       | 0.365        | <b>0.008</b> | <b>0.008</b> | 0.264        | 0.319        | 0.856        |
| Ref. cereals              | <0.001       | <b>0.006</b> | <0.001       | <0.001       | <b>0.044</b> | <b>0.006</b> | 0.310        | 1.000        | 0.306        | 0.199        |
| Total pastries            | <0.001       | 0.100        | 0.267        | <b>0.003</b> | 0.493        | <b>0.003</b> | 0.267        | 0.267        | 0.914        | 0.140        |
| Omnivorous pastries       | <0.001       | <b>0.026</b> | <b>0.026</b> | <0.001       | 0.653        | <b>0.032</b> | <b>0.039</b> | 0.405        | 0.104        | <0.001       |
| Vegan pastries            | <b>0.195</b> | <0.001       | <0.001       | <0.001       | <b>0.037</b> | <0.001       | <0.001       | 0.105        | <0.001       | <b>0.001</b> |
| Dark chocolate            | <0.001       | <b>0.056</b> | <b>0.019</b> | 0.268        | 0.492        | 0.234        | 0.044        | 0.750        | 0.374        | 0.377        |
| Sugar derivates           | <0.001       | <b>0.015</b> | 0.063        | <0.001       | 0.086        | <0.001       | 0.919        | 0.324        | 0.161        | 0.012        |
| Olive oil                 | <b>0.021</b> | 0.872        | 0.047        | 0.804        | 0.272        | 0.872        | 0.272        | 0.272        | 0.973        | 0.272        |
| Other vegetable fats      | <0.001       | 0.201        | 0.765        | <0.001       | <b>0.024</b> | <0.001       | <0.001       | 0.188        | <b>0.001</b> | <b>0.003</b> |
| Coffee & tea              | <0.001       | <b>0.006</b> | <b>0.001</b> | 0.117        | 0.278        | 0.117        | 0.013        | 0.817        | 0.288        | 0.288        |
| Kombucha                  | <b>0.001</b> | 0.091        | <0.001       | <0.001       | 0.820        | 0.792        | 0.787        | 0.787        | 0.787        | 0.855        |
| Bottled juices            | <0.001       | 0.168        | 0.075        | 0.075        | 0.075        | 0.054        | 0.075        | 0.906        | 0.906        | 0.885        |
| PB Alt. beverages         | <0.001       | <0.001       | <0.001       | <0.001       | <b>0.010</b> | <b>0.001</b> | <0.001       | 0.891        | 0.001        | <0.001       |
| Almond beverage           | <0.001       | 0.066        | <0.001       | <b>0.014</b> | 0.889        | 0.889        | 0.889        | 0.889        | 0.963        | 0.889        |
| Soy beverage              | <0.001       | <0.001       | <0.001       | <0.001       | <b>0.016</b> | <0.001       | <0.001       | 0.755        | <0.001       | <0.001       |
| Oat beverage              | <0.001       | <0.001       | <0.001       | <0.001       | 0.255        | <b>0.016</b> | <b>0.003</b> | 0.705        | 0.275        | 0.380        |
| Other PB beverages        | 0.208        | <b>0.001</b> | <b>0.001</b> | <b>0.001</b> | 0.140        | 0.208        | 0.208        | 0.656        | 0.691        | 0.830        |
| Wine                      | 0.523        | 0.369        | 0.673        | 0.369        | 0.523        | 0.804        | 0.369        | 0.523        | 0.369        | 0.369        |
| Beer                      | 0.522        | 0.337        | 0.388        | 0.850        | 0.426        | 0.617        | 0.617        | 0.675        | 0.402        | 0.426        |
| Spirits                   | <b>0.001</b> | 0.046        | <b>0.004</b> | <b>0.001</b> | 1.000        | 0.994        | 0.571        | 0.994        | 0.701        | 0.571        |
| Spices                    | <0.001       | <b>0.006</b> | <0.001       | <0.001       | 0.664        | 0.532        | <b>0.004</b> | 0.417        | <b>0.013</b> | <b>0.015</b> |
| Meat analogs              | 0.058        | <0.001       | <0.001       | <0.001       | <0.001       | <0.001       | <0.001       | 0.121        | 0.121        | 0.646        |
| PB Alt. protein           | <0.001       | <0.001       | <0.001       | <0.001       | <0.001       | <0.001       | <0.001       | <b>0.008</b> | <0.001       | <0.001       |
| Spreads                   | <b>0.004</b> | <b>0.004</b> | <0.001       | <0.001       | 0.336        | <b>0.001</b> | <0.001       | <b>0.036</b> | <b>0.018</b> | 0.847        |
| Smoothies                 | 0.416        | 0.416        | 0.140        | 0.140        | 0.247        | 0.416        | 0.452        | 0.140        | 0.140        | 0.987        |
| Vegan dairy-like products | <b>0.002</b> | <0.001       | <0.001       | <0.001       | 0.190        | <b>0.006</b> | <0.001       | 0.415        | <0.001       | <b>0.001</b> |

P-values derived from Kruskal-Wallis test. Statistically significant p-values are highlighted in bold.

All p-values were corrected for multiple testing by Benjamini-Hochberg method.

OMN: omnivore; PVG: pro-vegetarian; PCV: pesco-vegetarian; OVL: ovo-lacto-vegetarian; VGN: vegan. WG: whole grain; Ref.: refined; PB: plant-based; alc.: alcoholic; Alt.: alternative.

**Table S8.** Post-hoc analyses: Intake of main polyphenol subclasses (mg/2,000kcal per day) by type of diet in the OMIVECA study (n = 792).

|                              | OMN<br>vs PVG    | OMN<br>vs PCV    | OMN<br>vs OVL    | OMN<br>vs VGN    | PVG vs<br>PCV | PVG vs<br>OVL    | PVG vs<br>VGN    | PCV vs<br>OVL | PCV vs<br>VGN    | OVL vs<br>VGN    |
|------------------------------|------------------|------------------|------------------|------------------|---------------|------------------|------------------|---------------|------------------|------------------|
| <b>Total polyphenols</b>     | <b>&lt;0.001</b> | <b>&lt;0.001</b> | <b>&lt;0.001</b> | <b>&lt;0.001</b> | 0.723         | 0.053            | 0.534            | 0.28          | 0.393            | <b>0.012</b>     |
| <b>Flavonoids</b>            | <b>&lt;0.001</b> | <b>&lt;0.001</b> | <b>&lt;0.001</b> | <b>&lt;0.001</b> | 0.719         | 0.114            | 0.425            | 0.341         | 0.341            | <b>0.014</b>     |
| Anthocyanins                 | <b>&lt;0.001</b> | <b>0.034</b>     | 0.061            | 0.891            | 0.711         | 0.200            | <b>0.034</b>     | 0.503         | 0.061            | 0.207            |
| Dihydrochalcones             | <b>&lt;0.001</b> | 0.21             | 0.337            | 0.639            | 0.147         | <b>0.024</b>     | <b>0.022</b>     | 0.639         | 0.384            | 0.639            |
| Flavanols                    | <b>&lt;0.001</b> | <b>0.015</b>     | 0.137            | 0.109            | 0.449         | <b>0.015</b>     | 0.065            | 0.197         | 0.314            | 0.725            |
| Flavanones                   | 0.440            | 0.832            | 0.832            | 0.832            | 0.832         | 0.808            | 0.832            | 0.832         | 0.927            | 0.832            |
| Flavones                     | <b>&lt;0.001</b> | <b>0.004</b>     | <b>&lt;0.001</b> | <b>&lt;0.001</b> | 0.986         | 0.175            | <b>&lt;0.001</b> | 0.245         | 0.003            | <b>0.028</b>     |
| Flavonols                    | <b>&lt;0.001</b> | <b>&lt;0.001</b> | <b>&lt;0.001</b> | <b>&lt;0.001</b> | 0.623         | 0.041            | 0.531            | 0.338         | 0.403            | <b>0.007</b>     |
| Isoflavonoids                | <b>&lt;0.001</b> | <b>&lt;0.001</b> | <b>&lt;0.001</b> | <b>&lt;0.001</b> | <b>0.003</b>  | <b>&lt;0.001</b> | <b>&lt;0.001</b> | <b>0.020</b>  | <b>&lt;0.001</b> | <b>&lt;0.001</b> |
| <b>Phenolic acids</b>        | <b>&lt;0.001</b> | <b>&lt;0.001</b> | <b>&lt;0.001</b> | <b>&lt;0.001</b> | 0.706         | 0.343            | 0.722            | 0.984         | 0.801            | 0.706            |
| Hydroxybenzoic acids         | <b>0.043</b>     | <b>0.043</b>     | <b>0.133</b>     | <b>0.043</b>     | 0.637         | 0.781            | 0.781            | 0.565         | 0.781            | 0.678            |
| Hydroxycinnamic acids        | <b>&lt;0.001</b> | <b>&lt;0.001</b> | <b>&lt;0.001</b> | <b>&lt;0.001</b> | 0.596         | 0.387            | 0.611            | 0.854         | 0.611            | 0.611            |
| Hydroxyphenylacetic acids    | 0.747            | 0.310            | 0.310            | 0.335            | 0.310         | 0.310            | 0.310            | 0.812         | 0.747            | 0.747            |
| Hydroxyphenylpropanoic acids | 0.763            | 0.294            | 0.294            | 0.294            | 0.294         | 0.294            | 0.294            | 0.843         | 0.820            | 0.843            |
| <b>Lignans</b>               | <b>&lt;0.001</b> | <b>0.001</b>     | <b>&lt;0.001</b> | <b>&lt;0.001</b> | <b>0.032</b>  | <b>0.002</b>     | 0.427            | 0.780         | <b>0.013</b>     | <b>0.001</b>     |
| <b>Stilbenes</b>             | 0.687            | 0.624            | 0.624            | 0.001            | 0.793         | 0.513            | <b>0.001</b>     | 0.513         | <b>0.007</b>     | <b>0.012</b>     |
| <b>Other polyphenols</b>     | <b>&lt;0.001</b> | <b>&lt;0.001</b> | <b>&lt;0.001</b> | <b>&lt;0.001</b> | 0.084         | 0.294            | <b>0.014</b>     | 0.523         | 0.816            | 0.294            |
| Alkylmethoxyphenols          | <b>&lt;0.001</b> | 0.302            | 0.051            | 0.739            | 0.302         | 0.302            | <b>0.014</b>     | 0.739         | 0.302            | 0.064            |
| Alkylphenols                 | <b>&lt;0.001</b> | <b>0.039</b>     | 0.066            | 0.409            | 0.414         | <b>0.020</b>     | <b>0.003</b>     | 0.409         | 0.194            | 0.409            |
| Curcuminoids                 | <b>&lt;0.001</b> | <b>&lt;0.001</b> | <b>&lt;0.001</b> | <b>&lt;0.001</b> | 0.323         | 0.323            | <b>&lt;0.001</b> | 0.897         | <b>0.022</b>     | <b>0.003</b>     |
| Furanocoumarins              | <b>&lt;0.001</b> | 0.089            | <b>&lt;0.001</b> | <b>&lt;0.001</b> | 0.426         | 0.804            | 0.278            | 0.278         | 0.137            | 0.426            |
| Tyrosols                     | 0.587            | 0.157            | <b>0.006</b>     | 0.058            | 0.335         | 0.066            | 0.157            | 0.821         | 0.868            | 0.593            |
| Other polyphenols            | 0.973            | 0.795            | 0.576            | 0.567            | 0.878         | 0.576            | 0.576            | 0.908         | 0.567            | 0.567            |

P-values derived from Kruskal-Wallis test. Statistically significant p-values are highlighted in bold.

All p-values were corrected for multiple testing by Benjamini-Hochberg method.

OMN: omnivore; PVG: pro-vegetarian; PCV: pesco-vegetarian; OVL: ovo-lacto-vegetarian; VGN: vegan.

**Table S9.** Polyphenol's food contributions (%) to total polyphenols intake by type of diet in the OMIVECA study (n = 792)

|                   | <b>ALL<br/>n=792</b> | <b>OMN<br/>n=534</b> | <b>PVG<br/>n=92</b> | <b>PCV<br/>n=32</b> | <b>OVL<br/>n=75</b> | <b>VGN<br/>n=59</b> | <b>p-value</b> |
|-------------------|----------------------|----------------------|---------------------|---------------------|---------------------|---------------------|----------------|
| Vegetables        | 14.6 (9.7)           | 13.4 (9.5)           | 15.3 (8.4)          | 14.4 (6.8)          | 17.2 (9.8)          | 20.8 (11.7)         | <0.001         |
| Potatoes          | 1.8 (1.8)            | 2.2 (2.0)            | 0.9 (1.2)           | 1.1 (1.0)           | 1.4 (1.3)           | 1.1 (1.0)           | <0.001         |
| Legumes           | 2.3 (3.0)            | 2.3 (3.4)            | 1.5 (1.5)           | 1.9 (1.8)           | 2.4 (2.3)           | 3.2 (2.3)           | <0.001         |
| Fresh fruits      | 18.2 (12.1)          | 19.4 (12.6)          | 20.3 (12.6)         | 15.0 (9.0)          | 15.0 (7.6)          | 10.4 (6.8)          | <0.001         |
| Berries           | 7.9 (11.0)           | 7.5 (10.7)           | 9.5 (11.4)          | 12.0 (18.7)         | 7.2 (8.8)           | 7.5 (10.2)          | 0.215          |
| Nuts              | 5.0 (5.3)            | 4.5 (5.6)            | 6.0 (3.6)           | 4.4 (3.0)           | 5.2 (4.3)           | 8.7 (5.0)           | <0.001         |
| WG cereals        | 1.6 (2.3)            | 1.6 (2.6)            | 2.2 (2.1)           | 1.9 (2.0)           | 1.4 (1.4)           | 1.2 (1.1)           | <0.001         |
| Ref. cereals      | 1.2 (1.8)            | 1.4 (2.1)            | 0.6 (0.8)           | 0.8 (0.7)           | 0.8 (0.7)           | 0.7 (0.7)           | <0.001         |
| Bakery/pastries   | 3.2 (6.8)            | 4.1 (8.0)            | 1.2 (2.3)           | 1.5 (2.5)           | 1.8 (2.7)           | 0.6 (0.9)           | <0.001         |
| Dark chocolate    | 6.9 (9.3)            | 6.3 (9.1)            | 9.4 (9.0)           | 9.4 (12.4)          | 8.0 (9.2)           | 5.5 (8.4)           | 0.001          |
| Sugar derivates   | 10.6 (19.3)          | 13.4 (21.5)          | 2.9 (6.9)           | 6.5 (16.2)          | 5.7 (13.2)          | 5.6 (12.0)          | <0.001         |
| Olive oil         | 1.6 (1.5)            | 1.7 (1.6)            | 1.4 (1.3)           | 1.1 (0.9)           | 1.6 (1.7)           | 1.1 (1.0)           | 0.007          |
| Coffee & tea      | 12.0 (11.8)          | 11.9 (12.4)          | 14.7 (11.3)         | 12.7 (11.4)         | 12.4 (9.8)          | 8.5 (7.9)           | 0.006          |
| Kombucha          | 0.2 (1.4)            | 0.2 (1.4)            | 0.5 (1.7)           | 0.2 (0.4)           | 0.3 (0.6)           | 0.6 (1.6)           | <0.001         |
| PB Alt. beverages | 2.3 (6.3)            | 1.3 (5.3)            | 4.2 (9.6)           | 3.9 (6.6)           | 3.6 (5.6)           | 5.7 (6.5)           | <0.001         |
| Wine              | 0.6 (1.9)            | 0.6 (2.0)            | 0.8 (2.3)           | 0.6 (1.1)           | 0.5 (1.3)           | 0.5 (1.5)           | 0.314          |
| Beer              | 0.2 (0.5)            | 0.2 (0.5)            | 0.2 (0.3)           | 0.2 (0.2)           | 0.2 (0.4)           | 0.1 (0.2)           | 0.567          |
| Spices            | 3.4 (3.8)            | 3.0 (3.6)            | 3.6 (3.5)           | 3.5 (2.5)           | 4.4 (3.8)           | 5.8 (4.7)           | <0.001         |
| PB Alt. protein   | 0.8 (2.0)            | 0.1 (0.4)            | 0.3 (0.5)           | 1.5 (2.0)           | 2.8 (3.3)           | 4.5 (3.6)           | <0.001         |
| Smoothies         | 0.4 (1.0)            | 0.4 (1.0)            | 0.3 (0.8)           | 0.1 (0.3)           | 0.4 (1.0)           | 0.6 (1.4)           | 0.104          |
| Food groups sum   | 94.9 (14.9)          | 95.4 (16.7)          | 95.7 (7.4)          | 92.7 (12.1)         | 92.6 (10.6)         | 92.8 (12.2)         | 0.015          |

Contribution expressed in % and standard deviation in parenthesis; p-value derived from Kruskal-Wallis test. All were corrected for multiple testing by Benjamini-Hochberg method. Berries were not included in fresh fruits; beer is expressed as sum of alcoholic and nonalcoholic beer; pastries/bakery are expressed as sum of vegan pastries and not vegan pastries. Sugar derivates were mainly composed of bottled juices, chocolate candy and jams.

OMN: omnivore; PVG: pro-vegetarian; PCV: pesco-vegetarian; OVL: ovo-lacto-vegetarian; VGN: vegan; WG: whole grain; Ref.: refined; PB: plant-based; Alt.: alternative.

**Table S10.** Post-hoc analyses: Polyphenol's food contributions to total polyphenols intake by type of diet in the OMIVECA study (n = 792)

|                   | OMN vs PVG       | OMN vs PCV       | OMN vs OVL       | OMN vs VGN       | PVG vs PCV       | PVG vs OVL       | PVG vs VGN       | PCV vs OVL       | PCV vs VGN       | OVL vs VGN       |
|-------------------|------------------|------------------|------------------|------------------|------------------|------------------|------------------|------------------|------------------|------------------|
| Vegetables        | <b>0.023</b>     | 0.283            | <b>0.002</b>     | <b>&lt;0.001</b> | 0.723            | 0.329            | <b>0.021</b>     | 0.299            | <b>0.025</b>     | 0.172            |
| Potatoes          | <b>&lt;0.001</b> | <b>&lt;0.001</b> | <b>&lt;0.001</b> | <b>&lt;0.001</b> | 0.103            | <b>0.003</b>     | 0.163            | 0.371            | 0.721            | 0.198            |
| Legumes           | 0.384            | 0.974            | 0.05             | <b>&lt;0.001</b> | 0.408            | <b>0.006</b>     | <b>&lt;0.001</b> | 0.213            | <b>0.004</b>     | <b>0.032</b>     |
| Fresh fruits      | 0.520            | 0.047            | <b>0.018</b>     | <b>&lt;0.001</b> | <b>0.018</b>     | <b>0.018</b>     | <b>&lt;0.001</b> | 0.582            | <b>0.016</b>     | <b>0.001</b>     |
| Berries           | 0.531            | 0.531            | 0.592            | 0.957            | 0.890            | 0.632            | 0.531            | 0.632            | 0.531            | 0.592            |
| Nuts              | <b>&lt;0.001</b> | 0.299            | <b>0.025</b>     | <b>&lt;0.001</b> | <b>0.036</b>     | 0.095            | <b>&lt;0.001</b> | 0.471            | <b>&lt;0.001</b> | <b>&lt;0.001</b> |
| WG cereals        | <b>&lt;0.001</b> | 0.054            | 0.134            | 0.462            | 0.341            | <b>0.009</b>     | <b>0.001</b>     | 0.315            | 0.132            | 0.475            |
| Ref. cereals      | <b>&lt;0.001</b> | 0.194            | 0.056            | <b>0.007</b>     | 0.054            | 0.012            | 0.215            | 0.854            | 0.483            | 0.384            |
| Bakery/pastries   | <b>&lt;0.001</b> | <b>0.011</b>     | <b>0.024</b>     | <b>&lt;0.001</b> | 0.753            | 0.013            | 0.624            | 0.241            | 0.489            | <b>0.006</b>     |
| Dark chocolate    | <b>0.001</b>     | 0.186            | 0.120            | 0.899            | 0.763            | 0.370            | <b>0.021</b>     | 0.899            | 0.186            | 0.186            |
| Sugar derivates   | <b>&lt;0.001</b> | <b>0.009</b>     | <b>0.009</b>     | <b>&lt;0.001</b> | 0.092            | 0.001            | 0.844            | 0.371            | 0.279            | 0.059            |
| Olive oil         | 0.355            | 0.109            | 0.667            | <b>0.011</b>     | 0.355            | 0.676            | 0.109            | 0.223            | 0.667            | 0.064            |
| Coffee & tea      | <b>0.010</b>     | 0.335            | 0.253            | 0.335            | 0.335            | 0.335            | <b>0.005</b>     | 0.957            | 0.188            | 0.065            |
| Kombucha          | <b>0.002</b>     | 0.108            | <b>&lt;0.001</b> | <b>&lt;0.001</b> | 0.915            | 0.650            | 0.650            | 0.650            | 0.650            | 0.915            |
| PB Alt. beverages | <b>&lt;0.001</b> | <b>&lt;0.001</b> | <b>&lt;0.001</b> | <b>&lt;0.001</b> | 0.073            | <b>0.017</b>     | <b>&lt;0.001</b> | 0.973            | <b>0.007</b>     | <b>0.001</b>     |
| Wine              | 0.664            | 0.368            | 0.813            | 0.368            | 0.492            | 0.863            | 0.368            | 0.424            | 0.368            | 0.368            |
| Beer              | 0.790            | 0.712            | 0.617            | 0.617            | 0.617            | 0.617            | 0.617            | 0.989            | 0.617            | 0.617            |
| Spices            | <b>0.016</b>     | <b>0.060</b>     | <b>&lt;0.001</b> | <b>&lt;0.001</b> | 0.545            | 0.068            | <b>0.002</b>     | 0.360            | 0.060            | 0.088            |
| PB Alt. protein   | <b>&lt;0.001</b> |
| Smoothies         | 0.622            | 0.319            | 0.201            | 0.244            | 0.281            | 0.319            | 0.396            | 0.201            | 0.201            | 0.899            |
| Food groups sum   | 0.515            | 0.158            | 0.058            | 0.158            | 0.063            | 0.035            | 0.058            | 0.849            | 0.772            | 0.787            |

P-values derived from Kruskal-Wallis test. Statistically significant p-values are highlighted in bold. All were corrected for multiple testing by Benjamini-Hochberg method. Berries were not included in fresh fruits; beer is expressed as sum of alcoholic and nonalcoholic beer; bakery/pastries are expressed as sum of vegan pastries and not vegan pastries. Sugar derivates were mainly composed of bottled juices, chocolate candy and hams.

OMN: omnivore; PVG: pro-vegetarian; PCV: pesco-vegetarian; OVL: ovo-lacto-vegetarian; VGN: vegan; WG: whole grain; Ref.: refined; PB: plant-based; Alt.: alternative.

**Table S11.** Urine (poly)phenol concentrations (ng/mL) by type of diet in the urine subsample population (n = 200).

| Class                  | Subclass                  | Urine biomarker                     | ALL<br>n=200           | OMN<br>n=98            | PVG<br>n=19            | PCV<br>n=16            | OVL<br>n=45            | VGN<br>n=22              | p-value | N   | <LLOQ |
|------------------------|---------------------------|-------------------------------------|------------------------|------------------------|------------------------|------------------------|------------------------|--------------------------|---------|-----|-------|
|                        |                           | Total (poly)phenols (FC-creatinine) | 157.4<br>[119.2;213.7] | 132.1<br>[102.7;175.0] | 189.2<br>[154.2;218.9] | 178.5<br>[145.6;226.6] | 176.4<br>[134.0;255.2] | 215.0<br>[176.1;315.0]   | <0.001  | 200 | -     |
| Flavonoids             | Flavanones                | Naringenin                          | 24.5<br>[7.5;76.2]     | 16.0<br>[3.7;43.3]     | 48.9<br>[14.2;167.8]   | 17.0<br>[9.3;45.7]     | 29.1<br>[14.0;73.1]    | 133.6<br>[42.8;430.1]    | <0.001  | 199 | 0.51  |
|                        | Flavanones                | Hesperetin                          | 2.9<br>[1.0;40.0]      | 1.9<br>[0.7;16.1]      | 34.5<br>[2.4;243.9]    | 12.5<br>[2.2;53.8]     | 2.6<br>[1.0;15.2]      | 52.2<br>[3.2;344.0]      | 0.001   | 184 | 0.68  |
|                        | Isoflavonoids             | Daidzein                            | 11.4<br>[2.1;220.1]    | 2.7<br>[1.1;13.2]      | 13.1<br>[3.4;73.2]     | 34.0<br>[4.0;133.9]    | 168.1<br>[5.5;572.3]   | 1424.0<br>[685.1;2152.9] | <0.001  | 197 | 0.84  |
|                        | Isoflavonoids             | Genistein                           | 12.4<br>[2.5;127.6]    | 3.0 [1.2;12.6]         | 19.7 [4.8;43.0]        | 19.1<br>[5.8;135.7]    | 76.9<br>[18.2;311.2]   | 853.9<br>[286.4;3376.6]  | <0.001  | 198 | 0.49  |
|                        | Isoflavonoids             | Equol                               | 1.9<br>[1.1;4.1]       | 1.7<br>[1.0;3.3]       | 2.4<br>[1.2;11.5]      | 2.8<br>[1.6;4.1]       | 2.2<br>[1.5;6.1]       | 0.5<br>[0.3;221.0]       | 0.166   | 196 | 0.49  |
| Lignans                | Lignans                   | Enterolactone                       | 85.7<br>[34.6;279.5]   | 55.4<br>[24.5;157.2]   | 150.0<br>[74.5;261.2]  | 71.7<br>[47.6;208.4]   | 118.2<br>[55.4;400.4]  | 434.0<br>[73.3;1102.8]   | 0.002   | 200 | 0.62  |
|                        | Lignans                   | Enterodiol                          | 25.9<br>[11.0;73.8]    | 13.9<br>[7.6;31.6]     | 26.1<br>[15.4;64.7]    | 28.1<br>[17.3;86.6]    | 40.0<br>[20.5;132.4]   | 99.1<br>[58.2;423.3]     | <0.001  | 199 | 0.48  |
| Other<br>(poly)phenols | Tyrosols                  | Hydroxytyrosol                      | 22.1<br>[10.8;38.7]    | 16.9<br>[8.9;29.3]     | 46.5<br>[35.4;68.8]    | 26.4<br>[15.2;57.6]    | 27.4<br>[13.6;36.7]    | 30.1<br>[16.4;41.1]      | <0.001  | 200 | 1.16  |
|                        | Tyrosols                  | Tyrosol                             | 13.5<br>[11.4;19.6]    | 12.7<br>[10.8;15.3]    | 22.8<br>[13.7;36.3]    | 15.1<br>[12.4;16.9]    | 13.3<br>[11.8;20.3]    | 15.2<br>[12.2;22.8]      | 0.004   | 200 | 0.58  |
| Phenolic<br>acids      | Hydroxybenzoic acids      | Protocatechuic acid                 | 1.9<br>[1.1;3.5]       | 1.3<br>[0.9;2.4]       | 1.8<br>[1.0;3.1]       | 2.2<br>[2.1;3.4]       | 2.8<br>[1.8;4.0]       | 4.5<br>[3.4;6.5]         | <0.001  | 200 | 0.24  |
|                        | Hydroxyphenylacetic acids | 3,4-Dihydroxyphenylacetic acid      | 1.0<br>[0.6;1.7]       | 0.7<br>[0.5;1.0]       | 1.2<br>[0.7;1.8]       | 1.2<br>[0.9;2.2]       | 1.6<br>[1.1;3.7]       | 1.6<br>[0.9;2.7]         | <0.001  | 191 | 0.54  |
|                        | Hydroxybenzoic acids      | 4-Hydroxybenzoic acid               | 10.9<br>[8.0;15.0]     | 8.7<br>[7.0;11.9]      | 11.2<br>[8.6;13.2]     | 13.1<br>[9.0;20.2]     | 12.6<br>[9.5;15.2]     | 16.0<br>[13.4;20.9]      | <0.001  | 200 | 0.24  |
|                        | Hydroxybenzoic acids      | 3-Hydroxybenzoic acid               | 0.5<br>[0.3;0.8]       | 0.4<br>[0.3;0.7]       | 0.5<br>[0.3;0.9]       | 0.6<br>[0.5;1.2]       | 0.7<br>[0.4;1.0]       | 0.6<br>[0.4;1.1]         | 0.004   | 183 | 0.24  |
|                        | Hydroxyphenylacetic acids | 3-Hydroxyphenylacetic acid          | 76.1<br>[61.3;92.3]    | 71.2<br>[58.4;84.5]    | 71.9<br>[60.0;82.9]    | 85.4<br>[66.8;97.6]    | 86.7<br>[68.2;110.0]   | 81.8<br>[71.2;118.6]     | 0.001   | 199 | 0.30  |
|                        | Hydroxycinnamic acids     | m-Coumaric acid                     | 2.8<br>[1.0;6.4]       | 1.6<br>[0.6;3.6]       | 3.3<br>[1.3;10.3]      | 3.4<br>[2.6;5.0]       | 5.6<br>[2.9;8.8]       | 5.0<br>[2.0;15.6]        | <0.001  | 187 | 0.24  |
|                        | Hydroxycinnamic acids     | p-Coumaric acid                     | 4.5<br>[3.3;6.8]       | 3.6<br>[2.7;5.1]       | 3.9<br>[3.2;8.4]       | 5.4<br>[4.6;6.7]       | 5.6<br>[4.2;8.1]       | 6.4<br>[5.2;10.0]        | <0.001  | 198 | 0.25  |
|                        | Hydroxybenzoic acids      | Vanillic acid                       | 19.0<br>[10.5;29.6]    | 11.8<br>[8.7;20.1]     | 16.8<br>[10.6;34.4]    | 27.9<br>[14.9;43.8]    | 22.9<br>[17.6;41.2]    | 27.0<br>[24.3;44.6]      | <0.001  | 200 | 0.24  |
|                        | Hydroxyphenylacetic acids | Homovanillic acid                   | 11.3<br>[8.7;15.0]     | 9.5 [7.8;12.2]         | 10.7 [9.0;13.7]        | 14.2<br>[11.1;19.8]    | 14.0<br>[12.3;17.3]    | 12.4<br>[9.9;17.3]       | <0.001  | 198 | 0.46  |
|                        | Hydroxycinnamic acids     | Ferulic acid                        | 22.9<br>[14.9;37.1]    | 17.2<br>[11.9;24.0]    | 23.4<br>[18.1;33.3]    | 24.5<br>[15.0;32.2]    | 32.3<br>[21.4;49.3]    | 33.6<br>[25.4;43.0]      | <0.001  | 199 | 0.24  |
|                        | Hydroxycinnamic acids     | Caffeic acid                        | 4.9<br>[2.7;8.8]       | 3.9<br>[1.9;6.4]       | 5.6<br>[2.8;8.9]       | 6.3<br>[3.9;8.9]       | 7.1<br>[3.4;12.1]      | 6.3<br>[3.8;10.1]        | 0.001   | 200 | 0.49  |

Median and interquartile range; p-value derived from Kruskal-Wallis test. All p-values were corrected for multiple testing by Benjamini-Hochberg method. Total (poly)phenols were quantified using the Folin-Ciocalteu method, and urinary concentrations were normalized using creatinine and osmolality; OMN: omnivore; PVG: pro-vegetarian; PCV: pesco-vegetarian; OVL: ovo-lacto-vegetarian; VGN: vegan; FC: Folin-Ciocalteu method; <LLOQ: limit of quantification. N: represents the number of participants with metabolite values detected.

**Table S12.** Post-hoc analyses of geometric means of urinary polyphenols adjusted for batch in the urine sample study population (n = 200).

| Metabolite                            | OMN -<br>PVG | OMN-<br>PCV | OMN-<br>OVL | OMN-<br>VGN | PVG -<br>PCV | PVG -<br>OVL | PVG -<br>VGN | PCV-<br>OVL | PCV-<br>VGN | OVL-<br>VGN |
|---------------------------------------|--------------|-------------|-------------|-------------|--------------|--------------|--------------|-------------|-------------|-------------|
| Naringenin                            | 0.041        | 0.986       | 0.137       | <0.001      | 0.436        | 0.821        | 0.437        | 0.868       | 0.008       | 0.017       |
| Hesperetin                            | 0.020        | 0.891       | 1.000       | 0.025       | 0.525        | 0.031        | 1.000        | 0.893       | 0.588       | 0.039       |
| Daidzein                              | 0.137        | 0.054       | <0.001      | <0.001      | 0.992        | 0.093        | <0.001       | 0.377       | <0.001      | 0.002       |
| Genistein                             | 0.304        | 0.053       | <0.001      | <0.001      | 0.942        | 0.037        | <0.001       | 0.393       | 0.001       | 0.016       |
| Equol                                 | 0.380        | 0.829       | 0.258       | 0.499       | 0.988        | 0.998        | 1.000        | 0.999       | 0.998       | 1.000       |
| Enterolactone                         | 0.795        | 0.737       | 0.282       | 0.052       | 1.000        | 0.999        | 0.739        | 1.000       | 0.852       | 0.773       |
| Enterodiol                            | 0.715        | 0.693       | 0.129       | <0.001      | 1.000        | 0.994        | 0.053        | 0.999       | 0.096       | 0.041       |
| Hydroxytyrosol                        | 0.001        | 0.144       | 0.472       | 0.263       | 0.801        | 0.072        | 0.450        | 0.787       | 0.992       | 0.952       |
| Tyrosol                               | 0.004        | 0.909       | 0.529       | 0.708       | 0.292        | 0.160        | 0.320        | 1.000       | 0.999       | 1.000       |
| Protocatechuic acid                   | 0.370        | 0.121       | <0.001      | <0.001      | 0.978        | 0.536        | 0.037        | 0.942       | 0.213       | 0.374       |
| 3,4-<br>Dihydroxyphenylacetic<br>acid | 0.042        | 0.106       | <0.001      | 0.004       | 1.000        | 0.722        | 0.989        | 0.688       | 0.976       | 0.950       |
| 4-Hydroxybenzoic<br>acid              | 0.746        | 0.239       | 0.017       | 0.004       | 0.941        | 0.870        | 0.389        | 1.000       | 0.895       | 0.800       |
| 3-Hydroxybenzoic<br>acid              | 0.783        | 0.060       | 0.026       | 0.837       | 0.685        | 0.882        | 1.000        | 0.968       | 0.578       | 0.795       |
| 3-<br>Hydroxyphenylacetic<br>acid     | 0.935        | 0.702       | 0.657       | 0.644       | 0.487        | 0.475        | 0.431        | 0.997       | 1.000       | 0.997       |
| m-Coumaric acid                       | 0.084        | 0.400       | <0.001      | 0.011       | 0.988        | 0.859        | 0.990        | 0.577       | 0.875       | 0.990       |
| p-Coumaric acid                       | 0.709        | 0.397       | <0.001      | 0.003       | 0.990        | 0.468        | 0.360        | 0.865       | 0.722       | 0.991       |
| Vanillic acid                         | 0.160        | 0.034       | <0.001      | <0.001      | 0.969        | 0.544        | 0.324        | 0.961       | 0.784       | 0.964       |
| Homovanillic acid                     | 0.940        | 0.006       | <0.001      | 0.154       | 0.182        | 0.235        | 0.777        | 0.971       | 0.758       | 0.935       |
| Ferulic acid                          | 0.811        | 0.864       | <0.001      | 0.012       | 1.000        | 0.353        | 0.477        | 0.417       | 0.510       | 1.000       |
| Caffeic acid                          | 0.753        | 0.384       | 0.001       | 0.016       | 0.982        | 0.586        | 0.577        | 0.951       | 0.917       | 0.999       |

**Table S13.** Post-hoc analyses: Urine polyphenol values (ng/mL) by type of diet in the urine sample study population (n = 200).

|                                | <b>OMN<br/>vs<br/>PVG</b> | <b>OMN<br/>vs<br/>PCV</b> | <b>OMN<br/>vs<br/>OVL</b> | <b>OMN<br/>vs<br/>VGN</b> | <b>PVG<br/>vs<br/>PCV</b> | <b>PVG<br/>vs<br/>OVL</b> | <b>PVG<br/>vs<br/>VGN</b> | <b>PCV<br/>vs<br/>OVL</b> | <b>PCV<br/>vs<br/>VGN</b> | <b>OVL<br/>vs<br/>VGN</b> |
|--------------------------------|---------------------------|---------------------------|---------------------------|---------------------------|---------------------------|---------------------------|---------------------------|---------------------------|---------------------------|---------------------------|
| Naringenin                     | <b>0.022</b>              | 0.349                     | <b>0.022</b>              | <b>&lt;0.001</b>          | 0.349                     | 0.349                     | 0.166                     | 0.441                     | <b>0.005</b>              | <b>0.002</b>              |
| Hesperetin                     | <b>0.019</b>              | 0.190                     | 0.574                     | <b>0.006</b>              | 0.421                     | 0.052                     | 0.834                     | 0.255                     | 0.207                     | <b>0.006</b>              |
| Daidzein                       | <b>0.030</b>              | <b>0.011</b>              | <b>&lt;0.001</b>          | <b>&lt;0.001</b>          | 0.408                     | <b>0.014</b>              | <b>&lt;0.001</b>          | 0.098                     | <b>&lt;0.001</b>          | <b>&lt;0.001</b>          |
| Genistein                      | <b>0.018</b>              | <b>0.003</b>              | <b>&lt;0.001</b>          | <b>&lt;0.001</b>          | 0.466                     | <b>0.006</b>              | <b>&lt;0.001</b>          | 0.098                     | <b>0.001</b>              | <b>0.001</b>              |
| Equol                          | 0.542                     | 0.542                     | 0.307                     | 0.556                     | 0.922                     | 0.922                     | 0.548                     | 0.922                     | 0.556                     | 0.556                     |
| Enterolactone                  | 0.109                     | 0.413                     | 0.052                     | <b>0.006</b>              | 0.413                     | 0.843                     | 0.120                     | 0.413                     | 0.120                     | 0.225                     |
| Enterodiol                     | 0.046                     | 0.122                     | <b>&lt;0.001</b>          | <b>&lt;0.001</b>          | 0.921                     | 0.327                     | <b>0.005</b>              | 0.327                     | <b>0.014</b>              | <b>0.022</b>              |
| Hydroxytyrosol                 | <b>&lt;0.001</b>          | 0.094                     | <b>0.040</b>              | <b>0.040</b>              | 0.171                     | <b>0.007</b>              | 0.053                     | 0.609                     | 0.929                     | 0.609                     |
| Tyrosol                        | <b>0.005</b>              | 0.159                     | 0.246                     | 0.098                     | 0.159                     | 0.098                     | 0.166                     | 0.512                     | 0.836                     | 0.512                     |
| Protocatechuic acid            | 0.115                     | <b>0.005</b>              | <b>&lt;0.001</b>          | <b>&lt;0.001</b>          | 0.259                     | 0.084                     | <b>0.004</b>              | 0.646                     | <b>0.011</b>              | <b>0.006</b>              |
| 3,4-Dihydroxyphenylacetic acid | <b>0.002</b>              | <b>0.002</b>              | <b>&lt;0.001</b>          | <b>&lt;0.001</b>          | 0.895                     | 0.264                     | 0.64                      | 0.441                     | 0.670                     | 0.670                     |
| 4-Hydroxybenzoic acid          | 0.146                     | <b>0.015</b>              | <b>0.001</b>              | <b>&lt;0.001</b>          | 0.308                     | 0.311                     | 0.021                     | 0.611                     | 0.276                     | <b>0.026</b>              |
| 3-Hydroxybenzoic acid          | 0.392                     | <b>0.007</b>              | <b>0.007</b>              | 0.392                     | 0.392                     | 0.595                     | 0.875                     | 0.595                     | 0.524                     | 0.598                     |
| 3-Hydroxyphenylacetic acid     | 0.936                     | 0.065                     | <b>0.002</b>              | 0.047                     | 0.213                     | 0.065                     | 0.127                     | 0.936                     | 0.936                     | 0.936                     |
| m-Coumaric acid                | 0.053                     | 0.053                     | <b>&lt;0.001</b>          | <b>0.005</b>              | 0.868                     | 0.509                     | 0.509                     | 0.509                     | 0.509                     | 0.868                     |
| p-Coumaric acid                | 0.228                     | <b>0.006</b>              | <b>&lt;0.001</b>          | <b>&lt;0.001</b>          | 0.339                     | 0.246                     | 0.178                     | 0.806                     | 0.262                     | 0.339                     |
| Vanillic acid                  | 0.083                     | <b>0.020</b>              | <b>&lt;0.001</b>          | <b>&lt;0.001</b>          | 0.531                     | 0.124                     | 0.083                     | 0.935                     | 0.531                     | 0.124                     |
| Homovanillic acid              | 0.359                     | <b>0.002</b>              | <b>&lt;0.001</b>          | <b>0.02</b>               | <b>0.029</b>              | <b>0.011</b>              | 0.205                     | 0.682                     | 0.359                     | 0.374                     |
| Ferulic acid                   | 0.118                     | 0.152                     | <b>&lt;0.001</b>          | <b>&lt;0.001</b>          | 0.947                     | 0.118                     | 0.076                     | 0.170                     | 0.119                     | 0.733                     |
| Caffeic acid                   | 0.293                     | 0.158                     | <b>0.002</b>              | <b>0.012</b>              | 0.714                     | 0.405                     | 0.405                     | 0.640                     | 0.640                     | 0.718                     |

P-values derived from Kruskal-Wallis test. All were corrected for multiple testing by Benjamini-Hochberg method. Statistically significant p-values are highlighted in bold. OMN: omnivore; PVG: pro-vegetarian; PCV: pesco-vegetarian; OVL: ovo-lacto-vegetarian; VGN: vegan.

**Table S14.** Urine biomarkers with missing values greater than 10% in the urine sample study population (n = 200).

| Urine polyphenol        | ALL            | OMN            | PVG            | PCV            | OVL            | VGN              | p-value |
|-------------------------|----------------|----------------|----------------|----------------|----------------|------------------|---------|
| Apigenin                | 2.4 [1.2;5.5]  | 1.4 [0.8;3.1]  | 3.2 [1.4;4.8]  | 3.3 [2.0;5.9]  | 3.1 [1.7;9.6]  | 13.2 [6.2;35.3]  | <0.001  |
| Absent %                | 37 (18.5%)     | 11 (11.2%)     | 2 (10.5%)      | 2 (12.5%)      | 13 (28.9%)     | 9 (40.9%)        | 0.024   |
| Phloretin               | 4.6 [3.3;6.8]  | 4.0 [3.1;4.7]  | 6.9 [6.4;14.4] | 5.5 [5.5;5.5]  | 4.4 [3.2;20.4] | 4.6 [3.2;13.5]   | 0.220   |
| Absent %                | 170 (85.0%)    | 86 (87.8%)     | 15 (78.9%)     | 15 (93.8%)     | 39 (86.7%)     | 15 (68.2%)       | 0.285   |
| Kaempferol              | 9.6 [8.3;12.5] | 8.6 [7.9;10.5] | 8.4 [7.6;10.2] | 9.1 [8.3;13.5] | 9.6 [8.6;11.8] | 11.9 [10.7;13.5] | 0.004   |
| Absent %                | 92 (46.0%)     | 59 (60.2%)     | 10 (52.6%)     | 7 (43.8%)      | 14 (31.1%)     | 2 (9.1%)         | 0.001   |
| Isorhamnetin            | 3.8 [3.0;5.8]  | 3.3 [2.9;4.9]  | 3.4 [3.2;6.4]  | 5.1 [4.6;6.4]  | 3.8 [3.0;4.8]  | 6.8 [3.7;9.2]    | 0.082   |
| Absent %                | 123 (61.5%)    | 64 (65.3%)     | 10 (52.6%)     | 8 (50.0%)      | 27 (60.0%)     | 14 (63.6%)       | 0.784   |
| Resveratrol             | 2.0 [1.2;2.7]  | 1.6 [1.1;2.5]  | 1.7 [1.2;3.2]  | 2.3 [2.2;3.0]  | 2.1 [1.3;2.6]  | 2.5 [1.4;2.6]    | 0.338   |
| Absent %                | 91 (45.5%)     | 48 (49.0%)     | 10 (52.6%)     | 4 (25.0%)      | 20 (44.4%)     | 9 (40.9%)        | 0.653   |
| Gallic acid             | 2.8 [2.6;3.1]  | 2.6 [2.5;2.9]  | 2.7 [2.7;2.9]  | 2.8 [2.7;3.3]  | 2.8 [2.7;3.1]  | 2.8 [2.6;3.1]    | 0.422   |
| Absent %                | 137 (68.5%)    | 78 (79.6%)     | 12 (63.2%)     | 7 (43.8%)      | 28 (62.2%)     | 12 (54.5%)       | 0.031   |
| Gallic acid ethyl ester | 1.8 [1.7;2.2]  | 1.8 [1.7;2.2]  | 2.8 [1.9;5.9]  | 1.8 [1.8;1.9]  | 1.8 [1.7;2.0]  | 1.9 [1.8;2.1]    | 0.422   |
| Absent %                | 148 (74.0%)    | 73 (74.5%)     | 15 (78.9%)     | 10 (62.5%)     | 33 (73.3%)     | 17 (77.3%)       | 0.843   |
| Quercetin               | -              | -              | -              | -              | -              | -                | -       |
| Absent %                | 188 (94.0%)    | 94 (95.9%)     | 17 (89.5%)     | 14 (87.5%)     | 44 (97.8%)     | 19 (86.4%)       | 0.248   |

Median and interquartile range (ng/mL); p-value derived from Kruskal-Wallis test. All were corrected for multiple testing by Benjamini-Hochberg method.

n (%) for number of participants corresponding to non-detectable values. Metabolites not included in the table are those with less than 10% of missing values and those with more than 99%. OMN: omnivore; PVG: pro-vegetarian; PCV: pescovegetarian; OVL: ovo-lacto-vegetarian; VGN: vegan. Quercetin values were not available since the quantification was not possible for the majority of the samples.

**Table S15.** Factor loadings of the first three components of the PCA in the urine sample study population (n = 200).

| Urine biomarker                | Component 1  | Component 2   | Component 3   |
|--------------------------------|--------------|---------------|---------------|
| Naringenin                     | 0.016        | <b>-0.284</b> | <b>-0.652</b> |
| Hesperetin                     | 0.057        | 0.039         | <b>-0.730</b> |
| Daidzein                       | 0.098        | <b>0.731</b>  | -0.180        |
| Genistein                      | -0.063       | 0.760         | -0.071        |
| Equol                          | -0.100       | <b>0.597</b>  | -0.018        |
| Enterolactone                  | 0.070        | <b>0.202</b>  | 0.069         |
| Enterodiol                     | 0.092        | 0.185         | 0.030         |
| Hydroxytyrosol                 | <b>0.777</b> | -0.008        | 0.102         |
| Tyrosol                        | <b>0.590</b> | -0.034        | <b>-0.232</b> |
| Protocatechuic acid            | <b>0.252</b> | <b>0.323</b>  | <b>-0.428</b> |
| 3,4-Dihydroxyphenylacetic acid | -0.154       | 0.049         | 0.145         |
| 4-Hydroxybenzoic acid          | <b>0.229</b> | 0.042         | <b>-0.474</b> |
| 3-Hydroxybenzoic acid          | -0.131       | <b>0.286</b>  | <b>-0.366</b> |
| 3-Hydroxyphenylacetic acid     | <b>0.387</b> | 0.000         | <b>-0.264</b> |
| m-Coumaric acid                | 0.007        | -0.171        | <b>-0.643</b> |
| p-Coumaric acid                | <b>0.489</b> | 0.057         | <b>-0.266</b> |
| Vanillic acid                  | 0.004        | -0.105        | <b>-0.308</b> |
| Homovanillic acid              | <b>0.731</b> | -0.112        | 0.023         |
| Ferulic acid                   | <b>0.309</b> | 0.127         | 0.040         |
| Caffeic acid                   | <b>0.392</b> | 0.103         | -0.086        |

Factor loadings (FL) higher than 0.2 are highlighted in bold.

**Table S16.** Type of diet and urine polyphenol values by cluster of the PCA in the urine sample study population (n = 200).

|                           |                                | <b>Cluster 1:<br/>n=22</b> | <b>Cluster 2:<br/>n=60</b> | <b>Cluster 3:<br/>n=118</b> | <b>p-value</b> |
|---------------------------|--------------------------------|----------------------------|----------------------------|-----------------------------|----------------|
| <b>Type of diet</b>       |                                |                            |                            |                             | <0.001         |
|                           | Omnivorous                     | 0 (0.0%)                   | 17 (28.3%)                 | 81 (68.6%)                  |                |
|                           | Pro-vegetarian                 | 2 (9.1%)                   | 6 (10.0%)                  | 11 (9.3%)                   |                |
|                           | Pesco-vegetarian               | 0 (0.0%)                   | 8 (13.3%)                  | 8 (6.8%)                    |                |
|                           | Ovolacto-vegetarian            | 6 (27.3%)                  | 25 (41.7%)                 | 14 (11.9%)                  |                |
|                           | Vegan                          | 14 (63.6%)                 | 4 (6.7%)                   | 4 (3.4%)                    |                |
| <b>hPDI</b>               |                                | 70.5 [67.2;72.0]           | 63.5 [52.8;69.0]           | 54.0 [49.0;61.0]            | <0.001         |
| <b>PPS</b>                |                                | 66.5 [64.2;68.0]           | 66.0 [60.0;71.2]           | 57.0 [49.0;64.8]            | <0.001         |
| <b>Sex (Female)</b>       |                                | 16 (72.7%)                 | 48 (80.0%)                 | 89 (75.4%)                  | 0.719          |
| <b>Age (years)</b>        |                                | 28.5 [22.5;33.0]           | 25.5 [21.8;31.2]           | 24.0 [21.0;29.0]            | 0.181          |
| <b>Subclass</b>           | <b>Urine biomarker</b>         |                            |                            |                             |                |
| Flavanones                | Naringenin                     | 247.1 [67.7;593.5]         | 29.1 [10.0;74.7]           | 19.4 [4.2;45.9]             | <0.001         |
| Flavanones                | Hesperetin                     | 113.3 [3.5;502.7]          | 2.3 [1.3;26.0]             | 2.9 [0.8;23.7]              | 0.002          |
| Isoflavonoids             | Daidzein                       | 1517.3 [828.8;2502.1]      | 7.1 [2.4;135.7]            | 5.4 [1.6;88.5]              | <0.001         |
| Isoflavonoids             | Genistein                      | 1056.5 [602.6;5054.6]      | 16.6 [2.8;100.0]           | 7.0 [1.8;52.0]              | <0.001         |
| Isoflavonoids             | Equol                          | 6.2 [0.4;387.8]            | 1.9 [1.2;3.4]              | 1.9 [1.0;3.5]               | 0.634          |
| Lignans                   | Enterolactone                  | 574.2 [121.6;1146.5]       | 113.4 [37.3;309.4]         | 66.9 [32.4;165.7]           | <0.001         |
| Lignans                   | Enterodiol                     | 189.2 [31.1;540.0]         | 35.4 [14.4;94.0]           | 19.5 [8.1;49.6]             | <0.001         |
| Tyrosols                  | Hydroxytyrosol                 | 28.6 [15.3;43.0]           | 38.4 [25.8;65.2]           | 15.7 [9.7;27.7]             | <0.001         |
| Tyrosols                  | Tyrosol                        | 13.3 [11.5;25.7]           | 19.6 [14.1;31.9]           | 12.4 [10.8;14.7]            | <0.001         |
| Hydroxybenzoic acids      | Protocatechuic acid            | 4.7 [3.5;7.0]              | 2.6 [1.6;4.0]              | 1.4 [1.0;2.6]               | <0.001         |
| Hydroxyphenylacetic acids | 3,4-Dihydroxyphenylacetic acid | 1.5 [0.9;2.2]              | 1.3 [1.0;2.0]              | 0.7 [0.6;1.2]               | <0.001         |
| Hydroxybenzoic acids      | 4-Hydroxybenzoic acid          | 16.9 [12.9;20.9]           | 14.4 [10.7;20.2]           | 8.9 [7.1;11.4]              | <0.001         |
| Hydroxybenzoic acids      | 3-Hydroxybenzoic acid          | 0.6 [0.4;0.9]              | 0.6 [0.4;1.1]              | 0.4 [0.3;0.7]               | 0.019          |
| Hydroxyphenylacetic acids | 3-Hydroxyphenylacetic acid     | 77.9 [70.9;107.2]          | 94.2 [83.4;118.2]          | 67.1 [56.4;80.4]            | <0.001         |
| Hydroxycinnamic acids     | m-Coumaric acid                | 6.4 [3.4;12.7]             | 4.4 [1.9;12.1]             | 1.7 [0.7;3.6]               | <0.001         |
| Hydroxycinnamic acids     | p-Coumaric acid                | 6.4 [4.2;9.1]              | 6.9 [4.9;10.7]             | 3.6 [2.8;4.9]               | <0.001         |
| Hydroxybenzoic acids      | Vanillic acid                  | 27.6 [24.1;51.8]           | 29.0 [20.5;41.5]           | 13.0 [8.9;20.7]             | <0.001         |
| Hydroxyphenylacetic acids | Homovanillic acid              | 11.3 [9.9;15.5]            | 15.2 [12.7;19.5]           | 9.6 [7.8;12.1]              | <0.001         |
| Hydroxycinnamic acids     | Ferulic acid                   | 31.6 [22.2;38.5]           | 38.2 [26.7;50.5]           | 16.6 [11.6;23.4]            | <0.001         |
| Hydroxycinnamic acids     | Caffeic acid                   | 7.4 [4.1;10.2]             | 9.1 [5.3;12.8]             | 3.2 [1.8;5.6]               | <0.001         |

Median and interquartile range (ng/mL); p-value derived from Kruskal-Wallis test and corrected for Benjamini-Hochberg method.

**Table S17.** Post-hoc: urine polyphenol values by cluster of the PCA in the urine sample study population (n = 200).

| <b>Metabolites</b>             | <b>p.1 vs 2</b>  | <b>p.1 vs 3</b>  | <b>p.2 vs 3</b>  |
|--------------------------------|------------------|------------------|------------------|
| Naringenin                     | <b>&lt;0.001</b> | <b>&lt;0.001</b> | <b>0.044</b>     |
| Hesperetin                     | <b>0.003</b>     | <b>0.001</b>     | 0.559            |
| Daidzein                       | <b>&lt;0.001</b> | <b>&lt;0.001</b> | 0.177            |
| Genistein                      | <b>&lt;0.001</b> | <b>&lt;0.001</b> | 0.075            |
| Equol                          | 0.558            | 0.558            | 0.961            |
| Enterolactone                  | <b>0.005</b>     | <b>0.001</b>     | 0.075            |
| Enterodiol                     | <b>0.002</b>     | <b>&lt;0.001</b> | <b>0.005</b>     |
| Hydroxytyrosol                 | 0.061            | <b>0.019</b>     | <b>&lt;0.001</b> |
| Tyrosol                        | <b>0.042</b>     | <b>0.042</b>     | <b>&lt;0.001</b> |
| Protocatechuic acid            | <b>&lt;0.001</b> | <b>&lt;0.001</b> | <b>&lt;0.001</b> |
| 3,4-Dihydroxyphenylacetic acid | 0.742            | <b>0.002</b>     | <b>&lt;0.001</b> |
| 4-Hydroxybenzoic acid          | 0.191            | <b>&lt;0.001</b> | <b>&lt;0.001</b> |
| 3-Hydroxybenzoic acid          | 0.900            | 0.129            | <b>0.029</b>     |
| 3-Hydroxyphenylacetic acid     | <b>0.054</b>     | <b>0.003</b>     | <b>&lt;0.001</b> |
| m-Coumaric acid                | 0.217            | <b>&lt;0.001</b> | <b>&lt;0.001</b> |
| p-Coumaric acid                | 0.420            | <b>&lt;0.001</b> | <b>&lt;0.001</b> |
| Vanillic acid                  | 0.668            | <b>&lt;0.001</b> | <b>&lt;0.001</b> |
| Homovanillic acid              | <b>0.014</b>     | <b>0.006</b>     | <b>&lt;0.001</b> |
| Ferulic acid                   | 0.161            | <b>&lt;0.001</b> | <b>&lt;0.001</b> |
| Caffeic acid                   | 0.184            | <b>&lt;0.001</b> | <b>&lt;0.001</b> |

P-values derived from Kruskal-Wallis test. All were corrected for multiple testing by Benjamini-Hochberg method. Statistically significant p-values are highlighted in bold. OMN: omnivore; PVG: pro-vegetarian; PCV: pesco-vegetarian; OVL: ovo-lacto-vegetarian; VGN: vegan.

**Table S18.** Polyphenol intake (mg/2,000 kcal) of metabolites with urine values among the overall study population (n = 792) and the participants with urinary samples (n = 200).

| Dietary polyphenols             | ALL<br>n=792   | OMN<br>n=534    | PVG<br>n=92     | PCV<br>n=32     | OVL<br>n=75     | VGN<br>n=59     | p-value |
|---------------------------------|----------------|-----------------|-----------------|-----------------|-----------------|-----------------|---------|
| Naringenin                      | 9.7 [3.8;16.3] | 7.6 [3.4;14.8]  | 14.3 [6.3;20.6] | 9.9 [5.1;19.0]  | 11.4 [4.9;15.6] | 10.7 [4.1;18.9] | <0.001  |
| Hesperetin                      | 5.2 [1.8;9.1]  | 4.8 [1.7;8.9]   | 7.0 [2.6;11.1]  | 5.4 [2.3;11.4]  | 5.5 [2.3;8.7]   | 5.7 [2.0;11.2]  | 0.065   |
| Daidzein                        | 0.1 [<0.1;0.5] | <0.1 [<0.1;0.1] | 0.2 [<0.1;0.5]  | 0.6 [0.2;1.3]   | 1.5 [0.7;2.3]   | 2.9 [1.9;4.3]   | <0.001  |
| Genistein                       | 0.1 [<0.1;0.6] | <0.1 [<0.1;0.1] | 0.2 [<0.1;0.6]  | 0.8 [0.2;1.7]   | 1.8 [1.0;2.7]   | 3.3 [2.3;4.9]   | <0.001  |
| Ferulic acid                    | 9.2 [6.8;11.9] | 8.6 [6.4;11.1]  | 9.5 [7.1;12.3]  | 11.2 [9.1;13.8] | 10.5 [8.3;13.3] | 11.2 [8.6;13.3] | <0.001  |
| Homovanillic acid               | 0.1 [<0.1;0.3] | 0.1 [<0.1;0.3]  | 0.1 [0.1;0.2]   | 0.2 [0.1;0.5]   | 0.2 [<0.1;0.5]  | 0.1 [0.1;0.4]   | 0.174   |
| 4-Hydroxybenzoic acid           | 0.1 [<0.1;0.2] | 0.1 [<0.1;0.2]  | 0.2 [0.1;0.4]   | 0.1 [0.1;0.3]   | 0.1 [<0.1;0.3]  | 0.1 [0.0;0.2]   | 0.001   |
| Vanillic acid                   | 0.7 [0.5;1.1]  | 0.6 [0.4;0.9]   | 0.8 [0.6;1.1]   | 1.0 [0.8;1.3]   | 1.0 [0.6;1.4]   | 1.1 [0.8;1.5]   | <0.001  |
| Caffeic acid                    | 2.0 [1.5;2.5]  | 1.9 [1.4;2.4]   | 2.2 [1.8;2.7]   | 2.1 [1.9;2.8]   | 2.3 [1.8;2.8]   | 2.4 [2.0;3.2]   | <0.001  |
| p-Coumaric acid                 | 2.3 [1.6;3.7]  | 2.2 [1.4;3.4]   | 2.3 [1.5;3.7]   | 3.2 [1.9;4.5]   | 2.6 [1.9;4.0]   | 3.3 [2.6;4.6]   | <0.001  |
| m-Coumaric acid                 | 0.6 [<0.1;1.5] | 0.6 [<0.1;1.3]  | 0.6 [<0.1;1.0]  | 0.8 [0.3;2.8]   | 0.7 [<0.1;2.9]  | 0.6 [0.4;2.1]   | 0.174   |
| Protocatechuic acid             | 1.1 [0.6;2.0]  | 1.1 [0.6;2.2]   | 0.9 [0.6;1.4]   | 1.5 [0.7;2.0]   | 1.2 [0.7;1.7]   | 1.4 [0.9;2.5]   | 0.030   |
| 3,4-Dihydroxy-phenylacetic acid | 0.1 [<0.1;0.3] | 0.1 [<0.1;0.2]  | 0.1 [<0.1;0.2]  | 0.1 [0.1;0.5]   | 0.1 [<0.1;0.5]  | 0.1 [0.1;0.4]   | 0.193   |
| 3-Hydroxybenzoic acid           | 0.0 [0.0;<0.1] | 0.0 [0.0;<0.1]  | 0.0 [0.0;<0.1]  | <0.1 [0.0;<0.1] | <0.1 [0.0;<0.1] | 0.0 [0.0;<0.1]  | 0.318   |
| Hydroxytyrosol                  | 3.7 [0.4;8.9]  | 3.6 [0.3;7.9]   | 3.6 [0.4;5.7]   | 4.9 [2.2;16.6]  | 4.4 [0.4;17.2]  | 3.8 [2.7;12.4]  | 0.117   |
| Tyrosol                         | 1.3 [0.7;2.6]  | 1.2 [0.7;2.4]   | 1.2 [0.7;2.2]   | 1.6 [1.0;3.6]   | 1.7 [0.8;4.0]   | 1.4 [0.9;3.1]   | 0.045   |

  

| Dietary polyphenols             | ALL<br>n=200    | OMN<br>n=98     | PVG<br>n=19     | PCV<br>n=16      | OVL<br>n=45     | VGN<br>n=22     | p-value |
|---------------------------------|-----------------|-----------------|-----------------|------------------|-----------------|-----------------|---------|
| Naringenin                      | 10.2 [4.1;15.4] | 8.2 [3.3;14.2]  | 15.0 [6.0;22.5] | 10.5 [5.4;17.0]  | 11.4 [5.0;15.7] | 7.5 [4.7;15.3]  | 0.141   |
| Hesperetin                      | 5.1 [1.7;8.6]   | 4.3 [1.2;7.6]   | 7.9 [3.5;11.7]  | 6.0 [2.1;9.1]    | 5.7 [2.6;8.5]   | 5.4 [1.9;11.5]  | 0.245   |
| Daidzein                        | 0.2 [<0.1;1.3]  | <0.1 [<0.1;0.1] | 0.2 [0.1;0.4]   | 0.4 [0.3;1.2]    | 1.4 [0.7;2.3]   | 3.2 [2.0;5.1]   | <0.001  |
| Genistein                       | 0.3 [<0.1;1.5]  | <0.1 [<0.1;0.2] | 0.3 [<0.1;0.5]  | 0.5 [0.3;1.5]    | 1.8 [1.0;2.4]   | 3.9 [2.3;5.7]   | <0.001  |
| Ferulic acid                    | 9.7 [7.3;12.7]  | 8.8 [6.9;11.7]  | 8.8 [6.5;12.0]  | 13.3 [10.7;16.2] | 10.5 [8.2;13.4] | 10.2 [8.0;13.1] | 0.009   |
| Homovanillic acid               | 0.1 [0.1;0.4]   | 0.1 [<0.1;0.3]  | 0.1 [0.1;0.2]   | 0.2 [<0.1;0.7]   | 0.2 [<0.1;0.5]  | 0.1 [0.1;0.3]   | 0.655   |
| 4-Hydroxybenzoic acid           | 0.1 [<0.1;0.2]  | 0.1 [<0.1;0.2]  | 0.2 [0.1;0.3]   | 0.1 [0.1;0.3]    | 0.1 [0.1;0.3]   | <0.1 [0.0;0.1]  | 0.009   |
| Vanillic acid                   | 0.8 [0.5;1.2]   | 0.7 [0.4;0.9]   | 0.8 [0.6;1.2]   | 1.0 [0.8;1.2]    | 1.0 [0.6;1.5]   | 1.1 [0.6;1.3]   | 0.002   |
| Caffeic acid                    | 2.0 [1.6;2.6]   | 1.9 [1.4;2.5]   | 2.0 [1.9;2.5]   | 2.1 [2.0;2.5]    | 2.2 [1.9;2.8]   | 2.4 [2.0;2.8]   | 0.009   |
| p-Coumaric acid                 | 2.4 [1.7;3.6]   | 2.2 [1.6;3.2]   | 2.2 [1.6;2.7]   | 3.6 [2.3;4.8]    | 2.6 [1.8;4.1]   | 2.9 [2.1;4.0]   | 0.053   |
| m-Coumaric acid                 | 0.7 [<0.1;2.2]  | 0.6 [<0.1;1.7]  | 0.7 [0.2;0.9]   | 1.4 [<0.1;3.8]   | 0.9 [<0.1;2.9]  | 0.6 [0.5;1.5]   | 0.619   |
| Protocatechuic acid             | 1.2 [0.7;2.0]   | 1.2 [0.6;2.4]   | 0.8 [0.7;1.4]   | 1.8 [0.8;2.1]    | 1.2 [0.8;1.7]   | 1.3 [1.0;1.7]   | 0.655   |
| 3,4-Dihydroxy-phenylacetic acid | 0.1 [<0.1;0.4]  | 0.1 [<0.1;0.3]  | 0.1 [<0.1;0.1]  | 0.2 [<0.1;0.7]   | 0.2 [<0.1;0.5]  | 0.1 [0.1;0.3]   | 0.655   |
| 3-Hydroxybenzoic acid           | 0.0 [0.0;<0.1]  | 0.0 [0.0;<0.1]  | <0.1 [0.0;<0.1] | 0.0 [0.0;<0.1]   | <0.1 [0.0;<0.1] | 0.0 [0.0;<0.1]  | 0.571   |
| Hydroxytyrosol                  | 4.1 [0.5;13.1]  | 3.9 [0.4;10.2]  | 4.0 [1.5;5.4]   | 8.3 [0.2;22.8]   | 5.5 [0.5;17.2]  | 3.8 [2.9;9.2]   | 0.655   |
| Tyrosol                         | 1.6 [0.9;3.2]   | 1.4 [0.7;3.0]   | 1.7 [1.0;2.8]   | 2.2 [0.5;4.6]    | 1.9 [1.0;4.0]   | 1.1 [0.9;2.5]   | 0.571   |

Adjusted (2,000 kcal) median and interquartile range; p-value derived from Kruskal-Wallis test. All were corrected for multiple testing by Benjamini-Hochberg method. Enterolactone, enterodiol, equol and 3-hydroxyphenylacetic are not included in Phenol-Explorer.  
 OMN: omnivore; PVG: pro-vegetarian; PCV: pesco-vegetarian; OVL: ovo-lacto-vegetarian; VGN: vegan.

**Table S19.** Post-hoc analyses: Polyphenol intake of metabolites with urine values among the overall study population (n = 792) and the participants with urinary samples (n = 200).

| n=792<br>(diet)                 | OMN<br>vs<br>PVG | OMN<br>vs<br>PCV | OMN<br>vs<br>OVL | OMN<br>vs<br>VGN | PVG<br>vs<br>PCV | PVG<br>vs<br>OVL | PVG<br>vs<br>VGN | PCV<br>vs<br>OVL | PCV<br>vs<br>VGN | OVL<br>vs<br>VGN |
|---------------------------------|------------------|------------------|------------------|------------------|------------------|------------------|------------------|------------------|------------------|------------------|
| Naringenin                      | <b>0.014</b>     | <b>0.006</b>     | <b>&lt;0.001</b> | <b>0.014</b>     | <b>0.006</b>     | <b>&lt;0.001</b> | <b>0.014</b>     | <b>0.006</b>     | <b>&lt;0.001</b> | <b>0.014</b>     |
| Hesperetin                      | <b>0.014</b>     | <b>0.006</b>     | <b>&lt;0.001</b> | <b>0.014</b>     | <b>0.006</b>     | <b>&lt;0.001</b> | <b>0.014</b>     | <b>0.006</b>     | <b>&lt;0.001</b> | <b>0.014</b>     |
| Daidzein                        | 0.184            | <b>&lt;0.001</b> | <b>&lt;0.001</b> | 0.184            | <b>&lt;0.001</b> | <b>&lt;0.001</b> | 0.184            | <b>&lt;0.001</b> | <b>&lt;0.001</b> | 0.184            |
| Genistein                       | 0.161            | <b>&lt;0.001</b> | <b>&lt;0.001</b> | 0.161            | <b>&lt;0.001</b> | <b>&lt;0.001</b> | 0.161            | <b>&lt;0.001</b> | <b>&lt;0.001</b> | 0.161            |
| Ferulic acid                    | 0.161            | <b>&lt;0.001</b> | <b>&lt;0.001</b> | 0.161            | <b>&lt;0.001</b> | <b>&lt;0.001</b> | 0.161            | <b>&lt;0.001</b> | <b>&lt;0.001</b> | 0.161            |
| Homovanillic acid               | 0.184            | <b>&lt;0.001</b> | <b>&lt;0.001</b> | 0.184            | <b>&lt;0.001</b> | <b>&lt;0.001</b> | 0.184            | <b>&lt;0.001</b> | <b>&lt;0.001</b> | 0.184            |
| 4-Hydroxybenzoic acid           | <b>0.014</b>     | <b>0.006</b>     | <b>&lt;0.001</b> | <b>0.014</b>     | <b>0.006</b>     | <b>&lt;0.001</b> | <b>0.014</b>     | <b>0.006</b>     | <b>&lt;0.001</b> | <b>0.014</b>     |
| Vanillic acid                   | 0.161            | <b>&lt;0.001</b> | <b>&lt;0.001</b> | 0.161            | <b>&lt;0.001</b> | <b>&lt;0.001</b> | 0.161            | <b>&lt;0.001</b> | <b>&lt;0.001</b> | 0.161            |
| Caffeic acid                    | 0.184            | <b>&lt;0.001</b> | <b>&lt;0.001</b> | 0.184            | <b>&lt;0.001</b> | <b>&lt;0.001</b> | 0.184            | <b>&lt;0.001</b> | <b>&lt;0.001</b> | 0.184            |
| p-Coumaric acid                 | <b>0.014</b>     | <b>0.006</b>     | <b>&lt;0.001</b> | <b>0.014</b>     | <b>0.006</b>     | <b>&lt;0.001</b> | <b>0.014</b>     | <b>0.006</b>     | <b>&lt;0.001</b> | <b>0.014</b>     |
| m-Coumaric acid                 | 0.161            | <b>&lt;0.001</b> | <b>&lt;0.001</b> | 0.161            | <b>&lt;0.001</b> | <b>&lt;0.001</b> | 0.161            | <b>&lt;0.001</b> | <b>&lt;0.001</b> | 0.161            |
| Protocatechuic acid             | 0.184            | <b>&lt;0.001</b> | <b>&lt;0.001</b> | 0.184            | <b>&lt;0.001</b> | <b>&lt;0.001</b> | 0.184            | <b>&lt;0.001</b> | <b>&lt;0.001</b> | 0.184            |
| 3,4-Dihydroxy-phenylacetic acid | <b>0.014</b>     | <b>0.006</b>     | <b>&lt;0.001</b> | <b>0.014</b>     | <b>0.006</b>     | <b>&lt;0.001</b> | <b>0.014</b>     | <b>0.006</b>     | <b>&lt;0.001</b> | <b>0.014</b>     |
| 3-Hydroxybenzoic acid           | 0.161            | <b>&lt;0.001</b> | <b>&lt;0.001</b> | 0.161            | <b>&lt;0.001</b> | <b>&lt;0.001</b> | 0.161            | <b>&lt;0.001</b> | <b>&lt;0.001</b> | 0.161            |
| Hydroxytyrosol                  | 0.184            | <b>&lt;0.001</b> | <b>&lt;0.001</b> | 0.184            | <b>&lt;0.001</b> | <b>&lt;0.001</b> | 0.184            | <b>&lt;0.001</b> | <b>&lt;0.001</b> | 0.184            |
| Tyrosol                         | <b>0.014</b>     | <b>0.006</b>     | <b>&lt;0.001</b> | <b>0.014</b>     | <b>0.006</b>     | <b>&lt;0.001</b> | <b>0.014</b>     | <b>0.006</b>     | <b>&lt;0.001</b> | <b>0.014</b>     |
| n=200<br>(diet)                 | OMN<br>vs<br>PVG | OMN<br>vs<br>PCV | OMN<br>vs<br>OVL | OMN<br>vs<br>VGN | PVG<br>vs<br>PCV | PVG<br>vs<br>OVL | PVG<br>vs<br>VGN | PCV<br>vs<br>OVL | PCV<br>vs<br>VGN | OVL<br>vs<br>VGN |
| Naringenin                      | 0.087            | 0.406            | 0.406            | 0.530            | 0.530            | 0.406            | 0.406            | 0.857            | 0.832            | 0.832            |
| Hesperetin                      | 0.211            | 0.483            | 0.478            | 0.478            | 0.725            | 0.478            | 0.725            | 0.918            | 0.918            | 0.918            |
| Daidzein                        | <b>0.003</b>     | <b>&lt;0.001</b> | <b>&lt;0.001</b> | <b>&lt;0.001</b> | <b>0.098</b>     | <b>&lt;0.001</b> | <b>&lt;0.001</b> | <b>0.003</b>     | <b>&lt;0.001</b> | <b>&lt;0.001</b> |
| Genistein                       | <b>0.002</b>     | <b>&lt;0.001</b> | <b>&lt;0.001</b> | <b>&lt;0.001</b> | <b>0.120</b>     | <b>&lt;0.001</b> | <b>&lt;0.001</b> | <b>0.002</b>     | <b>&lt;0.001</b> | <b>&lt;0.001</b> |
| Ferulic acid                    | 0.859            | 0.008            | 0.062            | 0.250            | 0.049            | 0.202            | 0.417            | 0.114            | 0.077            | 0.639            |
| Homovanillic acid               | 0.828            | 0.828            | 0.828            | 0.828            | 0.828            | 0.828            | 0.828            | 0.935            | 0.828            | 0.828            |
| 4-Hydroxybenzoic acid           | 0.155            | 0.090            | <b>0.043</b>     | 0.111            | 0.865            | 0.982            | 0.043            | 0.865            | <b>0.030</b>     | <b>0.017</b>     |
| Vanillic acid                   | 0.141            | <b>0.018</b>     | <b>0.007</b>     | <b>0.016</b>     | 0.671            | 0.690            | 0.671            | 0.690            | 0.929            | 0.929            |
| Caffeic acid                    | 0.315            | 0.096            | <b>0.030</b>     | <b>0.030</b>     | 0.552            | 0.552            | 0.400            | 0.831            | 0.552            | 0.552            |
| p-Coumaric acid                 | 0.877            | 0.102            | 0.102            | 0.102            | 0.102            | 0.179            | 0.120            | 0.743            | 0.743            | 0.843            |
| m-Coumaric acid                 | 0.831            | 0.801            | 0.801            | 0.831            | 0.801            | 0.801            | 0.831            | 0.831            | 0.831            | 0.831            |
| Protocatechuic acid             | 0.718            | 0.795            | 0.938            | 0.845            | 0.718            | 0.718            | 0.718            | 0.795            | 0.795            | 0.795            |
| 3,4-Dihydroxy-phenylacetic acid | 0.734            | 0.734            | 0.734            | 0.734            | 0.734            | 0.734            | 0.734            | 0.734            | 0.734            | 0.734            |
| 3-Hydroxybenzoic acid           | 0.532            | 0.532            | 0.607            | 0.607            | 0.481            | 0.607            | 0.481            | 0.481            | 0.717            | 0.532            |
| Hydroxytyrosol                  | 0.870            | 0.870            | 0.870            | 0.870            | 0.870            | 0.870            | 0.870            | 0.870            | 0.870            | 0.870            |
| Tyrosol                         | 0.788            | 0.788            | 0.479            | 0.957            | 0.851            | 0.788            | 0.788            | 0.851            | 0.788            | 0.766            |

P-values derived from Kruskal-Wallis test. All were corrected for multiple testing by Benjamini-Hochberg method. Statistically significant p-values are highlighted in bold. OMN: omnivore; PVG: pro-vegetarian; PCV: pesco-vegetarian; OVL: ovo-lacto-vegetarian; VGN: vegan.

**Table S20.** Dietary scores values by type of diet

|      | ALL<br>n=792        | OMN<br>n=534        | PVG<br>n=92         | PCV<br>n=32         | OVL<br>n=75         | VGN<br>n=59         | p-<br>value | OMN<br>vs<br>PVG | OMN<br>vs<br>PCV | OMN<br>vs<br>OVL | OMN<br>vs<br>VGN | PVG<br>vs<br>PCV | PVG<br>vs<br>OVL | PVG<br>vs<br>VGN | PCV<br>vs<br>OVL | PCV<br>vs<br>VGN | OVL<br>vs<br>VGN |
|------|---------------------|---------------------|---------------------|---------------------|---------------------|---------------------|-------------|------------------|------------------|------------------|------------------|------------------|------------------|------------------|------------------|------------------|------------------|
| hPDI | 56.0<br>[48.0;64.0] | 51.0<br>[46.0;57.0] | 67.0<br>[65.0;70.0] | 64.0<br>[55.0;69.0] | 67.0<br>[59.0;70.5] | 73.0<br>[68.5;78.5] | <0.001      | <0.001           | <0.001           | <0.001           | <0.001           | <0.001           | 0.052            | <0.001           | 0.085            | <0.001           | <0.001           |
| PPS  | 59.0<br>[50.0;66.0] | 54.0<br>[47.0;61.0] | 67.0<br>[61.0;73.2] | 66.0<br>[61.5;70.2] | 67.0<br>[61.5;71.0] | 65.0<br>[61.0;68.5] | <0.001      | <0.001           | <0.001           | <0.001           | <0.001           | 0.762            | 0.507            | 0.507            | 0.873            | 0.873            | 0.873            |

hPDI: healthy pro-vegetarian index score; PPS: polyphenol-rich diet score.

OMN: omnivore; PVG: pro-vegetarian; PCV: pesco-vegetarian; OVL: ovo-lacto-vegetarian; VGN: vegan.

**Table S21.** Geometric means of polyphenol subclasses intake (mg per 2000 kcal/day) adjusted for age and sex in the OMIVECA study population (n = 792).

| Subclass                     | OMN   | PVG    | PCV   | OVL   | VGN    | p-value | OMN - PVG | OMN-PCV | OMN-OVL | OMN-VGN | PVG - PCV | PVG - OVL | PVG - VGN | PCV-OVL | PCV-VGN | OVL-VGN |
|------------------------------|-------|--------|-------|-------|--------|---------|-----------|---------|---------|---------|-----------|-----------|-----------|---------|---------|---------|
| Anthocyanins                 | 33.0  | 55.5   | 58.5  | 43.3  | 35.3   | <0.001  | 0.004     | 0.116   | 0.447   | 0.996   | 1.000     | 0.730     | 0.229     | 0.806   | 0.393   | 0.896   |
| Chalcones                    | 0.0   | 0.0    | 0.0   | 0.0   | 0.0    | 0.259   | 0.983     | 0.245   | 0.896   | 0.270   | 0.540     | 0.998     | 0.244     | 0.721   | 0.025   | 0.161   |
| Dihydrochalcones             | 0.1   | 0.2    | 0.9   | 0.1   | 0.2    | 0.355   | 0.948     | 0.464   | 0.980   | 0.972   | 0.821     | 0.855     | 1.000     | 0.387   | 0.866   | 0.895   |
| Dihydroflavonols             | 0.0   | 0.0    | 0.0   | 0.0   | 0.0    | 0.228   | 0.999     | 0.931   | 1.000   | 0.081   | 0.911     | 1.000     | 0.279     | 0.939   | 0.145   | 0.281   |
| Flavanols                    | 210.6 | 313.9  | 282.9 | 235.5 | 250.5  | <0.001  | <0.001    | 0.143   | 0.698   | 0.399   | 0.950     | 0.060     | 0.303     | 0.721   | 0.933   | 0.987   |
| Flavanones                   | 16.8  | 19.4   | 19.1  | 16.8  | 17.7   | 0.496   | 0.792     | 0.972   | 1.000   | 0.997   | 1.000     | 0.919     | 0.988     | 0.982   | 0.998   | 0.999   |
| Flavones                     | 15.7  | 25.4   | 23.3  | 31.8  | 47.2   | <0.001  | 0.002     | 0.321   | <0.001  | <0.001  | 0.996     | 0.699     | 0.010     | 0.684   | 0.038   | 0.270   |
| Flavonols                    | 47.9  | 72.7   | 69.0  | 63.2  | 79.0   | <0.001  | <0.001    | 0.002   | <0.001  | <0.001  | 0.989     | 0.424     | 0.884     | 0.933   | 0.774   | 0.113   |
| Isoflavonoids                | 0.1   | 0.7    | 6.0   | 31.6  | 75.0   | <0.001  | <0.001    | <0.001  | <0.001  | <0.001  | 0.103     | <0.001    | <0.001    | 0.344   | 0.058   | 0.777   |
| Lignans                      | 37.9  | 59.5   | 49.9  | 48.1  | 66.9   | <0.001  | <0.001    | 0.038   | 0.003   | <0.001  | 0.483     | 0.071     | 0.682     | 0.997   | 0.090   | 0.004   |
| Alkylmethoxyphenols          | 0.0   | 0.1    | 0.1   | 0.1   | 0.0    | 0.007   | 0.256     | 0.494   | 0.424   | 0.999   | 0.998     | 1.000     | 0.782     | 0.995   | 0.775   | 0.857   |
| Alkylphenols                 | 7.8   | 17.1   | 13.2  | 10.9  | 8.6    | <0.001  | <0.001    | 0.194   | 0.267   | 0.985   | 0.880     | 0.180     | 0.019     | 0.955   | 0.584   | 0.855   |
| Curcuminoids                 | 0.0   | 0.6    | 8.0   | 2.0   | 2.7    | <0.001  | <0.001    | <0.001  | <0.001  | <0.001  | 0.846     | 0.974     | 0.953     | 0.983   | 0.995   | 1.000   |
| Furanocoumarins              | 0.0   | 0.3    | 0.2   | 0.3   | 0.3    | <0.001  | 0.003     | 0.222   | 0.005   | 0.008   | 1.000     | 1.000     | 0.996     | 0.999   | 0.995   | 1.000   |
| Hydroxybenzaldehydes         | 0.0   | 0.0    | 0.1   | 0.1   | 0.0    | 0.005   | 0.977     | 0.373   | 0.049   | 0.999   | 0.294     | 0.064     | 0.973     | 1.000   | 0.670   | 0.409   |
| Hydroxycinnamaldehydes       | 0.0   | 0.0    | 0.0   | 0.0   | 0.0    | 0.048   | 1.000     | 1.000   | 0.017   | 0.999   | 1.000     | 0.112     | 1.000     | 0.385   | 1.000   | 0.270   |
| Hydroxycoumarins             | 0.0   | 0.0    | 0.0   | 0.0   | 0.0    | 0.004   | 0.032     | 0.999   | 1.000   | 0.008   | 0.357     | 0.202     | 0.922     | 1.000   | 0.138   | 0.056   |
| Methoxyphenols               | 0.0   | 0.0    | 0.0   | 0.0   | 0.0    | 0.007   | 0.241     | 0.946   | 0.204   | 0.978   | 0.989     | 1.000     | 0.894     | 0.973   | 0.999   | 0.832   |
| Naphthoquinones              | 0.0   | 0.0    | 0.0   | 0.0   | 0.0    | 0.990   | 0.999     | 0.997   | 0.995   | 0.995   | 0.991     | 1.000     | 1.000     | 0.986   | 0.985   | 1.000   |
| Other polyphenols            | 0.6   | 0.5    | 0.7   | 0.6   | 0.4    | 0.425   | 0.810     | 0.990   | 1.000   | 0.177   | 0.842     | 0.950     | 0.797     | 0.990   | 0.371   | 0.425   |
| Phenolic terpenes            | 0.0   | 0.0    | 0.0   | 0.0   | 0.0    | 0.048   | 1.000     | 1.000   | 0.017   | 0.999   | 1.000     | 0.112     | 1.000     | 0.385   | 1.000   | 0.270   |
| Tyrosols                     | 25.2  | 18.1   | 30.8  | 34.1  | 30.3   | 0.021   | 0.290     | 0.946   | 0.466   | 0.907   | 0.397     | 0.045     | 0.236     | 0.998   | 1.000   | 0.990   |
| Hydroxybenzoic acids         | 23.3  | 29.2   | 30.7  | 26.0  | 31.2   | <0.001  | 0.091     | 0.316   | 0.796   | 0.067   | 0.998     | 0.877     | 0.987     | 0.856   | 1.000   | 0.675   |
| Hydroxybenzoketones          | 0.0   | 0.0    | 0.0   | 0.0   | 0.0    | 0.188   | 0.984     | 0.876   | 0.792   | 0.353   | 0.981     | 0.986     | 0.760     | 1.000   | 0.995   | 0.960   |
| Hydroxycinnamic acids        | 163.2 | 239.4  | 219.6 | 220.6 | 221.2  | <0.001  | <0.001    | 0.034   | <0.001  | 0.001   | 0.944     | 0.883     | 0.920     | 1.000   | 1.000   | 1.000   |
| Hydroxyphenylacetic acids    | 0.3   | 0.2    | 0.5   | 0.4   | 0.4    | 0.145   | 0.779     | 0.867   | 0.873   | 0.943   | 0.550     | 0.482     | 0.615     | 0.999   | 0.998   | 1.000   |
| Hydroxyphenylpropanoic acids | 0.0   | 0.0    | 0.0   | 0.0   | 0.0    | 0.216   | 0.996     | 0.990   | 0.962   | 0.778   | 0.969     | 0.999     | 0.735     | 0.927   | 0.997   | 0.620   |
| Stilbenes                    | 0.2   | 0.1    | 0.2   | 0.1   | 0.1    | 0.140   | 0.874     | 1.000   | 0.947   | 0.038   | 0.974     | 1.000     | 0.411     | 0.987   | 0.326   | 0.394   |
| Total polyphenols            | 725.3 | 1036.4 | 993.4 | 925.8 | 1088.7 | <0.001  | <0.001    | <0.001  | <0.001  | <0.001  | 0.988     | 0.409     | 0.957     | 0.930   | 0.859   | 0.177   |

Means (adjusted 2,000 kcal) corrected for age and sex; p-value derived from t-test. Pairwise comparisons between diet groups were performed using the Tukey method to adjust for multiple testing.

OMN: omnivore; PVG: pro-vegetarian; PCV: pesco-vegetarian; OVL: ovo-lacto-vegetarian; VGN: vegan.

**Table S22.** Energy-unadjusted dietary intake of main polyphenol classes and subclasses (mg/2,000 kcal per day) by type of diet in the OMIVECA study (n = 792).

|                              | <b>ALL<br/>n=792</b>     | <b>OMN<br/>n=534</b>    | <b>PVG<br/>n=92</b>       | <b>PCV<br/>n=32</b>       | <b>OVL<br/>n=75</b>      | <b>VGN<br/>n=59</b>       | <b>p-<br/>value</b> |
|------------------------------|--------------------------|-------------------------|---------------------------|---------------------------|--------------------------|---------------------------|---------------------|
| <b>Total polyphenols</b>     | 1037.9<br>[738.7;1458.4] | 887.8<br>[650.5;1235.3] | 1385.4<br>[1032.6;1844.5] | 1424.5<br>[1117.1;1701.2] | 1249.3<br>[940.3;1694.2] | 1496.5<br>[1142.0;2045.9] | <0.001              |
| <b>Flavonoids</b>            | 551.3<br>[355.4;870.9]   | 478.8<br>[317.7;742.7]  | 813.6<br>[523.2;1101.8]   | 759.5<br>[626.1;943.1]    | 677.1<br>[458.6;1041.7]  | 843.5<br>[530.0;1280.6]   | <0.001              |
| Anthocyanins                 | 41.7 [20.4;88.4]         | 36.9 [18.6;71.0]        | 62.2<br>[28.2;138.1]      | 54.9 [40.5;88.4]          | 45.4 [29.0;104.8]        | 37.6 [15.4;116.3]         | <0.001              |
| Dihydrochalcones             | 1.3 [0.4;2.1]            | 0.8 [0.3;2.0]           | 2.0 [0.7;4.7]             | 2.0 [0.7;2.0]             | 2.0 [0.5;2.4]            | 1.1 [0.3;2.2]             | 0.001               |
| Flavanols                    | 306.2<br>[180.7;525.1]   | 272.4<br>[160.6;467.9]  | 479.2<br>[256.6;696.0]    | 391.5<br>[278.1;557.9]    | 345.1<br>[190.9;547.6]   | 335.4<br>[183.6;702.7]    | <0.001              |
| Flavanones                   | 23.9 [12.3;46.0]         | 23.2 [10.8;45.4]        | 29.8 [16.3;49.8]          | 23.1 [14.6;48.7]          | 24.3 [16.3;38.1]         | 29.9 [15.1;45.7]          | 0.274               |
| Flavones                     | 27.0 [13.4;48.7]         | 23.4 [8.5;42.6]         | 40.7<br>[22.6;117.7]      | 40.5 [23.4;120.5]         | 42.3 [24.8;120.2]        | 117.4 [42.4;124.9]        | <0.001              |
| Flavonols                    | 70.7<br>[49.5;110.3]     | 61.5 [41.7;93.0]        | 98.8<br>[69.1;138.6]      | 101.7<br>[64.6;132.8]     | 82.1 [58.6;125.4]        | 122.2 [72.0;162.8]        | <0.001              |
| Isoflavonoids                | 0.2 [<0.1;21.3]          | 0.1 [<0.1;2.6]          | 6.3 [0.1;22.4]            | 25.0 [4.1;65.5]           | 51.4 [22.8;88.9]         | 114.0 [80.7;162.0]        | <0.001              |
| <b>Phenolic acids</b>        | 299.9<br>[193.7;429.7]   | 259.5<br>[165.4;379.4]  | 405.7<br>[285.2;544.6]    | 377.9<br>[333.6;502.0]    | 392.3<br>[267.5;485.2]   | 399.0<br>[280.1;573.4]    | <0.001              |
| Hydroxybenzoic acids         | 31.5 [19.0;60.8]         | 29.2 [17.6;55.9]        | 34.9 [21.6;74.3]          | 45.2 [33.4;63.6]          | 38.0 [24.1;58.9]         | 38.4 [25.0;86.2]          | <0.001              |
| Hydroxycinnamic acids        | 251.5<br>[160.4;374.8]   | 215.0<br>[134.9;330.3]  | 359.6<br>[238.1;487.4]    | 315.2<br>[255.4;447.0]    | 349.9<br>[230.6;424.3]   | 351.2<br>[251.3;492.7]    | <0.001              |
| Hydroxyphenylacetic acids    | 0.6 [0.1;1.3]            | 0.6 [0.1;1.1]           | 0.6 [0.2;1.1]             | 0.8 [0.5;3.2]             | 1.0 [0.1;3.2]            | 0.7 [0.5;3.1]             | 0.060               |
| Hydroxyphenylpropanoic acids | 0.5 [0.0;0.9]            | 0.5 [0.0;0.9]           | 0.5 [0.0;0.9]             | 0.7 [0.5;2.8]             | 0.9 [0.0;2.8]            | 0.5 [0.5;2.8]             | 0.161               |
| <b>Lignans</b>               | 58.7 [38.0;84.3]         | 49.6 [33.3;72.2]        | 82.4<br>[61.2;120.7]      | 69.6 [47.6;91.1]          | 65.8 [48.8;85.2]         | 96.6 [63.0;142.2]         | <0.001              |
| <b>Stilbenes</b>             | 0.3 [0.1;0.5]            | 0.3 [0.1;0.6]           | 0.3 [0.1;0.5]             | 0.3 [0.1;0.7]             | 0.2 [0.1;0.5]            | 0.1 [0.1;0.3]             | 0.004               |
| <b>Other polyphenols</b>     | 79.9<br>[48.1;130.6]     | 65.7 [40.6;110.1]       | 93.3<br>[69.9;136.2]      | 129.1<br>[86.9;162.3]     | 102.7<br>[70.4;154.4]    | 126.3 [81.3;175.4]        | <0.001              |
| Alkylmethoxyphenols          | 0.6 [0.1;1.2]            | 0.5 [0.1;0.8]           | 0.8 [0.2;1.5]             | 0.6 [0.2;1.4]             | 0.6 [0.2;1.4]            | 0.4 [<0.1;1.2]            | <0.001              |
| Alkylphenols                 | 15.7 [5.0;32.5]          | 14.5 [3.5;29.1]         | 28.0 [15.3;35.3]          | 26.2 [13.1;35.6]          | 17.8 [6.7;33.6]          | 17.0 [5.7;30.7]           | <0.001              |
| Curcuminoids                 | 5.3 [2.7;30.1]           | 2.7 [0.0;16.4]          | 16.4 [5.3;32.1]           | 16.4 [5.3;38.1]           | 16.4 [5.3;38.1]          | 38.1 [16.4;95.3]          | <0.001              |
| Furanocoumarins              | 0.2 [0.1;0.4]            | 0.2 [0.1;0.3]           | 0.3 [0.2;0.4]             | 0.3 [0.2;0.4]             | 0.3 [0.2;0.4]            | 0.4 [0.2;1.1]             | <0.001              |
| Tyrosols                     | 33.1 [19.6;78.7]         | 31.2 [18.1;55.5]        | 35.8 [21.6;49.8]          | 47.4 [22.0;106.6]         | 46.1 [28.4;99.6]         | 45.1 [28.5;98.7]          | <0.001              |
| Other polyphenols            | 0.9 [0.5;1.6]            | 0.9 [0.5;1.6]           | 1.0 [0.4;1.5]             | 0.9 [0.6;1.5]             | 1.2 [0.6;1.7]            | 0.8 [0.3;1.6]             | 0.684               |

Median and interquartile range; p-value derived from Kruskal-Wallis test. All were corrected for multiple testing by Benjamini-Hochberg method.

Chalcones, dihydroflavonols, hydroxybenzaldehydes, hydroxybenzoketones, hydroxycoumarins, hydroxyphenylpropenes, methoxyphenols, naphthoquinones are not presented due to the low values for all the groups.

OMN: omnivore; PVG: pro-vegetarian; PCV: pesco-vegetarian; OVL: ovo-lacto-vegetarian; VGN: vegan.

**Table S23.** Dietary intake of main polyphenol classes and subclasses (mg/2,000kcal per day) by type of diet among females (n = 581).

|                              | ALL<br>n=581            | OMN<br>n=368           | PVG<br>n=79              | PCV<br>n=31              | OVL<br>n=64              | VGN<br>n=39              | p-<br>value |
|------------------------------|-------------------------|------------------------|--------------------------|--------------------------|--------------------------|--------------------------|-------------|
| <b>Total polyphenols</b>     | 896.4<br>[675.0;1163.2] | 771.0<br>[607.8;988.8] | 1118.1<br>[915.1;1342.0] | 1101.7<br>[887.9;1293.3] | 1022.1<br>[877.2;1221.2] | 1179.3<br>[969.8;1473.5] | <0.001      |
| <b>Flavonoids</b>            | 500.2<br>[330.8;668.3]  | 427.3<br>[285.7;579.1] | 625.3<br>[483.8;863.3]   | 605.5<br>[481.5;728.7]   | 587.7<br>[406.3;707.9]   | 696.3<br>[567.1;877.9]   | <0.001      |
| Anthocyanins                 | 35.2 [20.1;72.6]        | 32.1 [17.1;59.7]       | 58.6<br>[25.2;103.2]     | 40.8 [31.3;72.3]         | 36.6 [26.1;80.1]         | 29.3 [14.2;70.7]         | <0.001      |
| Dihydrochalcones             | 1.0 [0.4;2.0]           | 0.7 [0.3;1.8]          | 1.9 [0.7;3.2]            | 1.3 [0.6;1.7]            | 1.0 [0.4;2.1]            | 1.2 [0.4;2.0]            | <0.001      |
| Flavanols                    | 273.1<br>[167.5;407.2]  | 256.5<br>[144.6;373.7] | 397.1<br>[235.8;527.0]   | 344.4<br>[236.8;446.7]   | 281.1<br>[165.8;417.8]   | 303.1<br>[199.4;440.4]   | <0.001      |
| Flavanones                   | 21.1 [9.7;35.3]         | 20.8 [8.8;33.5]        | 24.9 [13.4;36.9]         | 23.1 [11.5;36.9]         | 20.2 [13.4;29.1]         | 19.9 [10.7;41.0]         | 0.413       |
| Flavones                     | 26.8 [15.0;53.1]        | 22.5 [8.7;42.0]        | 31.9 [19.2;66.6]         | 34.7 [20.7;70.1]         | 42.6 [22.6;98.6]         | 66.8 [36.0;110.1]        | <0.001      |
| Flavonols                    | 63.6 [44.4;87.4]        | 57.4 [39.1;73.8]       | 87.4<br>[63.1;114.1]     | 80.3 [58.3;96.2]         | 69.7 [57.2;93.5]         | 81.3 [68.6;117.2]        | <0.001      |
| Isoflavonoids                | 1.3 [<0.1;24.4]         | 0.1 [<0.1;2.8]         | 5.2 [0.1;19.8]           | 24.4 [5.6;59.0]          | 40.4 [20.2;63.9]         | 107.2 [66.2;130.4]       | <0.001      |
| <b>Phenolic acids</b>        | 252.2<br>[175.5;360.0]  | 216.6<br>[152.9;308.2] | 326.8<br>[235.7;464.6]   | 278.9<br>[233.8;390.3]   | 308.0<br>[237.2;384.1]   | 344.2<br>[245.4;419.0]   | <0.001      |
| Hydroxybenzoic acids         | 27.2 [17.6;46.0]        | 25.3 [15.7;40.6]       | 30.2 [20.5;58.5]         | 29.9 [25.8;60.1]         | 29.5 [21.2;47.3]         | 31.8 [22.3;58.0]         | 0.004       |
| Hydroxycinnamic acids        | 210.8<br>[146.1;314.3]  | 184.0<br>[122.0;280.7] | 288.0<br>[192.6;409.2]   | 247.5<br>[195.5;318.2]   | 272.6<br>[198.9;332.2]   | 303.2<br>[198.7;370.4]   | <0.001      |
| Hydroxyphenylacetic acids    | 0.6 [0.1;1.3]           | 0.6 [0.1;1.2]          | 0.5 [0.2;1.0]            | 0.7 [0.3;2.3]            | 0.7 [0.1;2.7]            | 0.5 [0.4;1.2]            | 0.436       |
| Hydroxyphenylpropanoic acids | 0.5 [0.0;1.1]           | 0.5 [0.0;1.0]          | 0.4 [0.0;0.7]            | 0.6 [0.3;2.1]            | 0.6 [0.0;2.3]            | 0.5 [0.3;1.1]            | 0.598       |
| <b>Lignans</b>               | 50.8 [35.9;67.2]        | 45.7 [31.3;58.7]       | 68.3 [50.9;90.1]         | 54.9 [44.8;68.1]         | 55.5 [40.7;67.0]         | 71.2 [55.2;101.5]        | <0.001      |
| <b>Stilbenes</b>             | 0.2 [0.1;0.4]           | 0.2 [0.1;0.4]          | 0.3 [0.1;0.4]            | 0.3 [0.1;0.4]            | 0.2 [0.1;0.3]            | 0.1 [<0.1;0.3]           | 0.018       |
| <b>Other polyphenols</b>     | 66.0 [43.0;98.7]        | 54.8 [38.3;86.2]       | 75.2 [54.0;99.5]         | 92.3 [66.8;131.2]        | 82.9 [57.8;140.7]        | 88.9 [68.7;128.0]        | <0.001      |
| Alkylmethoxyphenols          | 0.4 [0.1;0.9]           | 0.4 [0.1;0.8]          | 0.6 [0.1;1.3]            | 0.5 [0.2;0.9]            | 0.6 [0.2;1.1]            | 0.5 [<0.1;1.0]           | 0.007       |
| Alkylphenols                 | 14.2 [4.3;25.5]         | 11.9 [3.4;22.8]        | 22.0 [13.6;29.1]         | 22.5 [9.6;26.4]          | 15.9 [6.4;26.2]          | 13.2 [5.3;23.8]          | <0.001      |
| Curcuminoids                 | 5.5 [1.8;20.8]          | 2.9 [0.0;13.1]         | 14.5 [3.9;26.1]          | 16.9 [6.6;29.7]          | 19.1 [5.8;26.9]          | 28.1 [16.2;60.8]         | <0.001      |
| Furanocoumarins              | 0.2 [0.1;0.3]           | 0.2 [0.1;0.3]          | 0.3 [0.2;0.4]            | 0.2 [0.1;0.4]            | 0.2 [0.2;0.3]            | 0.3 [0.2;0.6]            | <0.001      |
| Tyrosols                     | 29.4 [18.2;48.8]        | 28.0 [16.7;45.3]       | 29.0 [17.2;42.9]         | 33.6 [19.4;69.5]         | 37.0 [20.9;91.3]         | 31.7 [24.0;46.3]         | 0.044       |
| Other polyphenols            | 0.8 [0.4;1.3]           | 0.7 [0.4;1.3]          | 0.9 [0.4;1.3]            | 0.8 [0.5;1.1]            | 1.0 [0.4;1.4]            | 0.6 [0.2;1.3]            | 0.598       |

Median and interquartile range; p-value derived from Kruskal-Wallis test. All were corrected for multiple testing by Benjamini-Hochberg method. Chalcones, dihydroflavonols, hydroxybenzaldehydes, hydroxybenzoketones, hydroxycoumarins, hydroxyphenylpropenes, methoxyphenols, naphthoquinones are not presented due to the low values for all the groups.

OMN: omnivore; PVG: pro-vegetarian; PCV: pesco-vegetarian; OVL: ovo-lacto-vegetarian; VGN: vegan.

**Table S24.** Dietary intake of main polyphenol classes and subclasses (mg/2,000kcal per day) by type of diet among participants older than 24 years (n = 299).

|                              | <b>ALL<br/>n=299</b>    | <b>OMN<br/>n=143</b>    | <b>PVG<br/>n=48</b>      | <b>PCV<br/>n=19</b>      | <b>OVL<br/>n=42</b>      | <b>VGN<br/>n=47</b>      | <b>p-<br/>value</b> |
|------------------------------|-------------------------|-------------------------|--------------------------|--------------------------|--------------------------|--------------------------|---------------------|
| <b>Total polyphenols</b>     | 981.4<br>[742.6;1220.6] | 827.1<br>[629.3;1033.8] | 1122.9<br>[921.5;1311.1] | 1200.2<br>[946.5;1321.4] | 1024.0<br>[900.3;1255.1] | 1120.9<br>[952.5;1487.5] | <0.001              |
| <b>Flavonoids</b>            | 523.0<br>[337.0;706.6]  | 384.2<br>[274.3;576.9]  | 603.7<br>[407.9;801.4]   | 616.3<br>[473.9;714.3]   | 575.9<br>[437.7;729.0]   | 614.4<br>[494.0;877.9]   | <0.001              |
| Anthocyanins                 | 32.9 [19.0;66.6]        | 29.2 [16.3;48.7]        | 52.8 [24.4;89.8]         | 40.8 [31.9;55.3]         | 39.9 [26.8;70.5]         | 21.5 [11.3;52.9]         | 0.002               |
| Dihydrochalcones             | 1.1 [0.4;2.0]           | 0.9 [0.4;1.9]           | 1.6 [0.6;2.5]            | 1.1 [0.7;1.8]            | 1.3 [0.4;2.1]            | 0.8 [0.3;1.8]            | 0.234               |
| Flavanols                    | 258.4<br>[155.3;412.3]  | 200.6<br>[133.0;359.2]  | 340.0<br>[210.2;479.7]   | 307.3<br>[228.9;410.9]   | 294.8<br>[182.4;423.6]   | 286.8<br>[126.1;461.1]   | 0.001               |
| Flavanones                   | 21.3 [9.6;36.0]         | 21.4 [8.8;35.2]         | 26.5 [12.2;36.1]         | 27.7 [12.5;36.9]         | 19.7 [10.9;28.7]         | 21.5 [10.3;36.4]         | 0.672               |
| Flavones                     | 33.2 [19.3;80.7]        | 23.4 [11.8;42.4]        | 33.0 [18.9;68.5]         | 36.9 [26.5;73.2]         | 51.1 [28.9;104.5]        | 78.9 [46.8;111.9]        | <0.001              |
| Flavonols                    | 68.7 [50.9;93.5]        | 58.2 [42.8;78.6]        | 84.0<br>[63.9;113.0]     | 80.3 [63.3;106.2]        | 71.9 [57.9;96.4]         | 80.3 [66.1;127.3]        | <0.001              |
| Isoflavonoids                | 5.8 [<0.1;48.6]         | 0.1 [<0.1;2.9]          | 5.9 [0.1;25.9]           | 32.2 [2.5;65.3]          | 48.6 [23.6;69.0]         | 88.6 [54.3;127.5]        | <0.001              |
| <b>Phenolic acids</b>        | 305.3<br>[222.7;414.5]  | 273.5<br>[181.7;397.4]  | 371.8<br>[290.1;489.9]   | 324.2<br>[267.3;507.9]   | 308.0<br>[243.3;364.6]   | 344.2<br>[241.0;411.1]   | 0.001               |
| Hydroxybenzoic acids         | 26.8 [17.1;50.8]        | 23.0 [14.6;42.6]        | 27.6 [17.2;56.8]         | 33.6 [25.6;53.0]         | 32.5 [19.2;52.6]         | 27.5 [17.6;56.5]         | 0.042               |
| Hydroxycinnamic acids        | 265.7<br>[186.6;366.3]  | 234.7<br>[154.6;346.7]  | 341.0<br>[262.5;432.8]   | 294.3<br>[245.6;386.0]   | 258.9<br>[198.1;328.3]   | 303.2<br>[191.9;366.3]   | 0.001               |
| Hydroxyphenylacetic acids    | 0.7 [0.4;2.1]           | 0.8 [0.4;1.5]           | 0.7 [0.4;1.1]            | 1.7 [0.5;2.6]            | 2.4 [0.4;3.1]            | 0.6 [0.4;1.7]            | 0.164               |
| Hydroxyphenylpropanoic acids | 0.6 [0.3;1.8]           | 0.6 [0.3;1.3]           | 0.5 [0.3;0.9]            | 1.5 [0.4;2.3]            | 2.0 [0.3;2.8]            | 0.5 [0.3;1.5]            | 0.177               |
| <b>Lignans</b>               | 55.8 [38.4;74.5]        | 48.0 [33.3;66.2]        | 66.1 [50.0;93.5]         | 55.3 [44.8;67.5]         | 57.8 [37.7;71.0]         | 71.2 [49.4;97.6]         | <0.001              |
| <b>Stilbenes</b>             | 0.2 [0.1;0.5]           | 0.2 [0.1;0.6]           | 0.3 [0.1;0.6]            | 0.4 [0.2;0.6]            | 0.2 [0.1;0.3]            | 0.1 [<0.1;0.3]           | 0.003               |
| <b>Other polyphenols</b>     | 77.5<br>[52.1;111.8]    | 62.9 [41.8;88.1]        | 85.3<br>[61.3;106.2]     | 94.1 [90.2;132.1]        | 110.9<br>[64.3;146.4]    | 90.8 [70.2;128.2]        | <0.001              |
| Alkylmethoxyphenols          | 0.6 [0.3;1.2]           | 0.6 [0.3;1.2]           | 1.0 [0.5;1.6]            | 0.5 [0.2;1.3]            | 0.5 [0.1;0.9]            | 0.4 [<0.1;0.8]           | 0.001               |
| Alkylphenols                 | 15.1 [4.6;25.6]         | 13.0 [3.8;25.0]         | 23.5 [14.3;29.9]         | 18.0 [7.2;25.6]          | 15.9 [6.1;24.9]          | 12.6 [4.2;20.8]          | 0.006               |
| Curcuminoids                 | 11.9 [2.6;24.6]         | 2.9 [0.0;15.5]          | 16.1 [4.1;28.3]          | 15.4 [6.6;29.7]          | 16.6 [4.5;24.7]          | 23.6 [14.1;70.7]         | <0.001              |
| Furanocoumarins              | 0.2 [0.1;0.3]           | 0.2 [<0.1;0.3]          | 0.3 [0.2;0.4]            | 0.2 [0.1;0.4]            | 0.2 [0.2;0.3]            | 0.2 [0.2;0.5]            | <0.001              |
| Tyrosols                     | 36.0 [22.4;67.9]        | 32.1 [20.7;53.1]        | 36.7 [26.0;43.7]         | 57.7 [22.8;83.1]         | 70.6 [33.3;97.3]         | 33.5 [25.0;63.9]         | 0.010               |
| Other polyphenols            | 0.9 [0.4;1.4]           | 0.9 [0.5;1.5]           | 1.0 [0.5;1.3]            | 0.9 [0.6;1.7]            | 0.9 [0.4;1.3]            | 0.7 [0.2;1.2]            | 0.234               |

Median and interquartile range; p-value derived from Kruskal-Wallis test. All were corrected for multiple testing by Benjamini-Hochberg method.

Chalcones, dihydroflavonols, hydroxybenzaldehydes, hydroxybenzoketones, hydroxycoumarins, hydroxyphenylpropenes, methoxyphenols, naphthoquinones are not presented due to the low values for all the groups.

OMN: omnivore; PVG: pro-vegetarian; PCV: pesco-vegetarian; OVL: ovo-lacto-vegetarian; VGN: vegan.

**Table S25.** Dietary intake of main polyphenol classes and subclasses (mg/2,000kcal per day) by type of diet among participants of nutrition-related fields (n = 369).

|                              | <b>ALL<br/>n=369</b>    | <b>OMN<br/>n=273</b>   | <b>PVG<br/>n=43</b>      | <b>PCV<br/>n=10</b>      | <b>OVL<br/>n=30</b>     | <b>VGN<br/>n=13</b>      | <b>p-<br/>value</b> |
|------------------------------|-------------------------|------------------------|--------------------------|--------------------------|-------------------------|--------------------------|---------------------|
| <b>Total polyphenols</b>     | 814.2<br>[618.8;1074.3] | 730.9<br>[581.0;969.5] | 1070.2<br>[851.2;1236.2] | 1227.4<br>[988.8;1304.6] | 901.1<br>[816.3;1130.0] | 1091.7<br>[973.2;1203.7] | <0.001              |
| <b>Flavonoids</b>            | 444.3<br>[301.6;618.6]  | 400.9<br>[273.3;557.8] | 583.8<br>[370.1;702.3]   | 621.7<br>[530.6;757.3]   | 485.3<br>[353.0;683.0]  | 618.6<br>[564.0;721.7]   | <0.001              |
| Anthocyanins                 | 33.8 [19.8;75.2]        | 32.4 [17.5;68.8]       | 55.5 [23.5;97.1]         | 40.3 [32.0;95.1]         | 36.1 [26.8;59.4]        | 29.5 [10.4;40.6]         | 0.184               |
| Dihydrochalcones             | 1.0 [0.4;1.9]           | 0.8 [0.3;1.8]          | 1.7 [0.6;2.7]            | 1.4 [0.7;1.5]            | 1.3 [0.4;2.5]           | 0.7 [0.5;1.8]            | 0.024               |
| Flavanols                    | 261.4<br>[152.2;376.0]  | 250.1<br>[139.8;357.3] | 326.9<br>[200.7;428.3]   | 367.9<br>[268.6;469.8]   | 266.2<br>[152.8;391.6]  | 226.2<br>[197.1;345.8]   | 0.020               |
| Flavanones                   | 20.6 [9.8;32.5]         | 20.7 [9.9;32.5]        | 19.4 [8.7;31.7]          | 16.0 [8.8;45.9]          | 19.9 [14.9;28.7]        | 22.4 [11.8;36.9]         | 0.974               |
| Flavones                     | 21.9 [8.3;42.4]         | 19.6 [6.6;36.9]        | 28.9 [18.8;59.1]         | 20.7 [15.8;78.4]         | 27.7 [20.3;70.3]        | 43.4 [24.9;50.3]         | <0.001              |
| Flavonols                    | 59.8 [38.9;76.2]        | 53.3 [34.9;69.1]       | 74.8 [53.4;99.9]         | 69.2 [47.9;90.7]         | 69.3 [59.6;81.8]        | 81.3 [66.9;98.0]         | <0.001              |
| Isoflavonoids                | 0.1 [<0.1;10.9]         | 0.1 [<0.1;3.2]         | 5.2 [0.1;12.7]           | 37.5 [16.1;65.8]         | 35.5 [21.0;58.9]        | 116.9 [54.8;136.0]       | <0.001              |
| <b>Phenolic acids</b>        | 215.7<br>[152.0;335.7]  | 202.4<br>[136.8;302.0] | 314.5<br>[201.3;454.9]   | 276.8<br>[231.1;395.1]   | 303.6<br>[208.2;378.7]  | 328.6<br>[248.3;351.8]   | <0.001              |
| Hydroxybenzoic acids         | 25.3 [15.6;43.0]        | 23.8 [15.1;42.0]       | 26.6 [16.8;54.6]         | 31.6 [27.6;55.7]         | 27.6 [20.9;35.8]        | 29.8 [25.9;38.1]         | 0.238               |
| Hydroxycinnamic acids        | 187.1<br>[123.2;295.9]  | 167.7<br>[112.2;250.7] | 288.0<br>[178.3;418.8]   | 215.6<br>[193.7;329.0]   | 266.9<br>[175.5;349.3]  | 274.2<br>[209.2;337.6]   | <0.001              |
| Hydroxyphenylacetic acids    | 0.5 [<0.1;1.1]          | 0.5 [<0.1;1.0]         | 0.4 [<0.1;0.8]           | 0.6 [0.4;3.5]            | 0.5 [0.1;1.2]           | 0.6 [0.5;2.3]            | 0.113               |
| Hydroxyphenylpropanoic acids | 0.4 [0.0;0.9]           | 0.4 [0.0;0.9]          | 0.3 [0.0;0.6]            | 0.6 [0.4;3.1]            | 0.4 [0.0;1.0]           | 0.6 [0.4;2.1]            | 0.177               |
| <b>Lignans</b>               | 45.4 [32.7;59.3]        | 40.7 [29.6;54.5]       | 57.5 [46.6;78.5]         | 52.0 [35.0;65.8]         | 50.9 [43.2;65.6]        | 63.7 [52.2;82.7]         | <0.001              |
| <b>Stilbenes</b>             | 0.2 [0.1;0.4]           | 0.2 [0.1;0.4]          | 0.2 [0.1;0.3]            | 0.2 [0.1;0.3]            | 0.2 [0.1;0.4]           | 0.1 [0.1;0.3]            | 0.282               |
| <b>Other polyphenols</b>     | 63.4 [40.5;96.7]        | 57.2 [37.0;87.3]       | 76.7<br>[55.2;102.6]     | 118.7<br>[73.2;148.8]    | 78.3 [52.7;108.4]       | 115.1 [88.9;131.1]       | <0.001              |
| Alkylmethoxyphenols          | 0.4 [0.1;0.8]           | 0.3 [<0.1;0.6]         | 0.8 [0.1;1.2]            | 0.4 [0.2;0.5]            | 0.4 [0.1;1.1]           | 0.2 [<0.1;1.0]           | 0.022               |
| Alkylphenols                 | 14.7 [4.4;27.2]         | 12.7 [3.8;25.0]        | 23.1 [14.5;35.7]         | 25.5 [12.8;26.0]         | 20.5 [8.2;29.1]         | 24.8 [5.6;30.8]          | 0.002               |
| Curcuminoids                 | 4.5 [1.6;21.6]          | 2.9 [0.0;15.0]         | 16.5 [3.9;28.4]          | 26.5 [6.8;36.8]          | 19.9 [4.4;29.2]         | 37.2 [12.2;46.1]         | <0.001              |
| Furanocoumarins              | 0.2 [0.1;0.3]           | 0.2 [0.1;0.3]          | 0.3 [0.2;0.4]            | 0.3 [0.1;0.6]            | 0.3 [0.2;0.5]           | 0.4 [0.2;0.8]            | <0.001              |
| Tyrosols                     | 26.0 [14.7;42.9]        | 25.6 [14.5;40.5]       | 22.7 [14.4;37.2]         | 31.5 [22.8;105.7]        | 29.2 [21.3;47.7]        | 46.5 [26.1;69.8]         | 0.042               |
| Other polyphenols            | 0.6 [0.3;1.2]           | 0.6 [0.4;1.2]          | 0.9 [0.3;1.1]            | 0.6 [0.4;0.8]            | 0.8 [0.3;1.2]           | 0.5 [0.3;1.3]            | 0.974               |

Median and interquartile range; p-value derived from Kruskal-Wallis test. All were corrected for multiple testing by Benjamini-Hochberg method.

Chalcones, dihydroflavonols, hydroxybenzaldehydes, hydroxybenzoketones, hydroxycoumarins, hydroxyphenylpropenes, methoxyphenols, naphthoquinones are not presented due to the low values for all the groups.

OMN: omnivore; PVG: pro-vegetarian; PCV: pesco-vegetarian; OVL: ovo-lacto-vegetarian; VGN: vegan.

**Table S26.** Food groups contributions (%) to total polyphenols when coffee portion size is equal to 175 mL

| Food group        | ALL         | OMN         | PVG         | PCV         | OVL         | VGN         | p-value |
|-------------------|-------------|-------------|-------------|-------------|-------------|-------------|---------|
| Coffee & tea      | 25.8 (22.0) | 25.5 (22.6) | 30.7 (21.5) | 26.6 (20.9) | 27.1 (20.3) | 18.6 (17.7) | 0.007   |
| Vegetables        | 12.1 (8.7)  | 11.0 (8.3)  | 12.3 (7.3)  | 12.1 (6.9)  | 14.4 (9.0)  | 18.5 (11.0) | <0.001  |
| Fresh fruits      | 15.3 (11.3) | 16.4 (11.9) | 16.6 (12.2) | 12.3 (7.5)  | 12.1 (6.3)  | 9.2 (6.3)   | <0.001  |
| Berries           | 6.8 (10.2)  | 6.4 (9.8)   | 8.0 (10.5)  | 10.7 (18.2) | 6.2 (8.2)   | 6.9 (9.7)   | 0.450   |
| Nuts              | 4.3 (5.0)   | 3.8 (5.3)   | 4.8 (3.3)   | 3.6 (2.5)   | 4.4 (4.1)   | 7.8 (4.9)   | <0.001  |
| Dark chocolate    | 5.7 (8.0)   | 5.2 (7.8)   | 7.7 (7.8)   | 7.9 (10.8)  | 6.7 (8.1)   | 4.7 (7.5)   | 0.030   |
| Sugar derivates   | 9.6 (18.4)  | 12.1 (20.7) | 2.5 (6.5)   | 5.8 (15.1)  | 5.1 (12.5)  | 5.4 (11.8)  | <0.001  |
| Spices            | 2.9 (3.3)   | 2.5 (3.3)   | 2.8 (2.8)   | 3.0 (2.3)   | 3.7 (3.4)   | 5.1 (4.2)   | <0.001  |
| Pastries          | 2.7 (6.0)   | 3.5 (7.1)   | 1.0 (1.9)   | 1.3 (2.0)   | 1.6 (2.5)   | 0.6 (0.8)   | <0.001  |
| Potatoes          | 1.5 (1.7)   | 1.8 (1.8)   | 0.7 (0.9)   | 0.9 (0.8)   | 1.1 (1.1)   | 0.9 (0.9)   | <0.001  |
| Legumes           | 1.9 (2.6)   | 1.9 (2.9)   | 1.2 (1.4)   | 1.6 (1.6)   | 2.0 (1.9)   | 2.9 (2.2)   | <0.001  |
| Wholegrain cereal | 1.3 (2.0)   | 1.3 (2.1)   | 1.7 (1.9)   | 1.5 (1.5)   | 1.1 (1.2)   | 1.0 (0.9)   | 0.023   |
| Refined cereal    | 1.0 (1.6)   | 1.2 (1.9)   | 0.5 (0.7)   | 0.7 (0.6)   | 0.7 (0.6)   | 0.6 (0.6)   | <0.001  |
| Olive oil         | 1.3 (1.3)   | 1.4 (1.4)   | 1.1 (0.9)   | 0.9 (0.6)   | 1.3 (1.3)   | 0.9 (0.8)   | <0.001  |
| Kombucha          | 0.2 (1.4)   | 0.2 (1.4)   | 0.4 (1.5)   | 0.1 (0.3)   | 0.2 (0.6)   | 0.6 (1.6)   | 0.142   |
| Wine              | 0.5 (1.4)   | 0.4 (1.4)   | 0.6 (1.6)   | 0.5 (0.7)   | 0.4 (1.2)   | 0.3 (1.0)   | 0.879   |
| PB alt. protein   | 0.7 (1.8)   | 0.1 (0.4)   | 0.2 (0.4)   | 1.2 (1.8)   | 2.3 (2.9)   | 4.0 (3.5)   | <0.001  |
| Smoothies         | 0.3 (0.8)   | 0.3 (0.8)   | 0.3 (0.8)   | 0.1 (0.2)   | 0.4 (0.9)   | 0.5 (1.1)   | <0.001  |
| Beer              | 0.2 (0.4)   | 0.2 (0.4)   | 0.1 (0.2)   | 0.1 (0.2)   | 0.2 (0.3)   | 0.1 (0.2)   | 0.028   |
| PB beverages      | 1.9 (5.5)   | 1.1 (4.6)   | 3.5 (8.6)   | 3.1 (5.7)   | 3.0 (4.7)   | 5.0 (6.3)   | <0.001  |
| TOTAL             | 95.9 (13.8) | 96.4 (15.5) | 96.7 (5.8)  | 93.9 (10.9) | 93.9 (9.5)  | 93.8 (11.6) | 0.077   |

Adjusted intakes by 2,000 kcal: mean (standard deviation); p-value derived from Kruskal-Wallis test.

All p-values were corrected for multiple testing by Benjamini-Hochberg method.

OMN: omnivore; PVG: pro-vegetarian; PCV: pesco-vegetarian; OVL: ovo-lacto-vegetarian; VGN: vegan; alt: alternative; PB: plant-based.

**Table S27.** Urine (poly)phenol concentrations (ng/mL) by type of diet in the urine subsample population restricted to participants not consuming polyphenol-containing (poly)phenol-supplements (n=175).

| Class                 | Subclass                  | Urine biomarker                | ALL<br>n=200           | OMN<br>n=98            | PVG<br>n=19            | PCV<br>n=16            | OVL<br>n=45            | VGN<br>n=22              | p-value | N    | <LLOQ |
|-----------------------|---------------------------|--------------------------------|------------------------|------------------------|------------------------|------------------------|------------------------|--------------------------|---------|------|-------|
|                       | Total (poly)phenols (FC)  |                                | 155.1<br>[118.6;204.0] | 132.8<br>[102.9;174.7] | 170.2<br>[149.3;218.9] | 178.5<br>[145.6;226.6] | 160.8<br>[138.2;273.0] | 198.1<br>[145.9;236.7]   | <0.001  | 175  | -     |
| Flavonoids            | Flavanones                | Naringenin                     | 24.1<br>[7.8;77.4]     | 16.3<br>[3.9;42.5]     | 53.0<br>[24.2;354.2]   | 17.0 [9.3;45.7]        | 28.1<br>[15.4;77.9]    | 104.4<br>[41.9;245.8]    | <0.001  | 175  | 0.51  |
|                       | Flavanones                | Hesperetin                     | 2.9 [1.0;49.8]         | 1.9 [0.7;15.9]         | 34.5<br>[2.4;622.6]    | 12.5 [2.2;53.8]        | 2.7 [1.0;11.3]         | 19.7 [4.1;180.9]         | 0.004   | 175  | 0.68  |
|                       | Isoflavonoids             | Daidzein                       | 12.1<br>[1.9;194.1]    | 2.5 [1.1;13.3]         | 27.3<br>[4.7;108.8]    | 34.0<br>[4.0;133.9]    | 174.3<br>[9.9;685.3]   | 1358.6<br>[672.0;2165.3] | <0.001  | 175  | 0.84  |
|                       | Isoflavonoids             | Genistein                      | 12.1<br>[2.5;116.2]    | 3.1 [1.3;12.4]         | 24.6 [9.0;51.4]        | 19.1<br>[5.8;135.7]    | 92.0<br>[22.8;350.1]   | 675.6<br>[148.9;2923.2]  | <0.001  | 175  | 0.49  |
|                       | Isoflavonoids             | Equol                          | 1.8 [1.0;3.6]          | 1.8 [1.0;3.2]          | 2.5 [1.4;61.6]         | 2.8 [1.6;4.1]          | 2.4 [1.5;5.7]          | 0.4 [0.2;20.7]           | 0.02    | 175  | 0.49  |
| Lignans               | Lignans                   | Enterolactone                  | 77.8<br>[34.1;231.9]   | 55.0<br>[23.4;154.0]   | 150.0<br>[74.5;216.2]  | 71.7<br>[47.6;208.4]   | 94.4<br>[41.5;348.4]   | 367.3<br>[67.2;771.8]    | 0.019   | 175  | 0.62  |
|                       | Lignans                   | Enterodiol                     | 24.7<br>[10.0;61.8]    | 13.5<br>[7.7;31.6]     | 22.1<br>[13.8;69.5]    | 28.1<br>[17.3;86.6]    | 37.9<br>[18.3;84.4]    | 64.7<br>[42.0;199.0]     | <0.001  | 175  | 0.48  |
| Other (poly)phenols   | Tyrosols                  | Hydroxytyrosol                 | 21.8<br>[10.9;38.9]    | 18.6<br>[9.1;29.9]     | 40.2<br>[25.7;61.6]    | 26.4<br>[15.2;57.6]    | 26.7<br>[13.1;36.4]    | 33.1 [20.0;46.3]         | 0.001   | 175  | 1.16  |
|                       | Tyrosols                  | Tyrosol                        | 13.5<br>[11.5;19.8]    | 12.6<br>[10.9;15.6]    | 24.3<br>[13.9;38.8]    | 15.1<br>[12.4;16.9]    | 13.3<br>[11.8;20.4]    | 15.6 [12.2;21.3]         | 0.006   | 175  | 0.58  |
| Phenolic acids        | Hydroxybenzoic acids      | Protocatechuic acid            | 1.9 [1.1;3.4]          | 1.4 [0.9;2.4]          | 2.0 [1.0;3.1]          | 2.2 [2.1;3.4]          | 2.6 [1.8;4.2]          | 5.1 [3.3;7.1]            | <0.001  | 175  | 0.24  |
|                       | Hydroxyphenylacetic acids | 3,4-Dihydroxyphenylacetic acid | 1.0 [0.6;1.7]          | 0.7 [0.5;1.1]          | 1.0 [0.7;2.3]          | 1.2 [0.9;2.2]          | 1.6 [1.1;3.8]          | 1.6 [1.0;3.5]            | <0.001  | 175  | 0.54  |
|                       | Hydroxybenzoic acids      | 4-Hydroxybenzoic acid          | 10.5<br>[8.0;14.7]     | 8.7 [7.0;11.9]         | 10.6 [8.5;15.5]        | 13.1 [9.0;20.2]        | 12.0<br>[8.8;15.2]     | 15.5 [12.0;17.8]         | <0.001  | 175  | 0.24  |
|                       | Hydroxybenzoic acids      | 3-Hydroxybenzoic acid          | 0.5 [0.3;0.8]          | 0.4 [0.3;0.6]          | 0.5 [0.3;0.9]          | 0.6 [0.5;1.2]          | 0.5 [0.4;0.9]          | 0.6 [0.4;1.1]            | 0.006   | 175  | 0.24  |
|                       | Hydroxyphenylacetic acids | 3-Hydroxyphenylacetic acid     | 75.1<br>[60.2;91.2]    | 71.2<br>[58.0;84.1]    | 69.8<br>[60.0;81.4]    | 85.4<br>[66.8;97.6]    | 84.2<br>[67.0;110.9]   | 86.3<br>[70.7;124.7]     | 0.002   | 175  | 0.3   |
|                       | Hydroxycinnamic acids     | m-Coumaric acid                | 2.5 [0.9;5.8]          | 1.6 [0.6;3.5]          | 3.3 [1.3;10.2]         | 3.4 [2.6;5.0]          | 5.3 [2.7;8.7]          | 4.4 [1.9;16.4]           | <0.001  | 175  | 0.24  |
|                       | Hydroxycinnamic acids     | p-Coumaric acid                | 4.4 [3.3;6.6]          | 3.6 [2.8;5.0]          | 3.7 [3.0;7.3]          | 5.4 [4.6;6.7]          | 5.9 [4.3;9.0]          | 6.5 [5.1;12.2]           | <0.001  | 175  | 0.25  |
|                       | Hydroxybenzoic acids      | Vanillic acid                  | 18.3<br>[10.5;29.7]    | 11.9<br>[8.8;19.9]     | 25.1<br>[12.6;38.1]    | 27.9<br>[14.9;43.8]    | 22.9<br>[17.5;41.7]    | 27.0 [23.9;46.7]         | <0.001  | 175  | 0.24  |
|                       | Hydroxyphenylacetic acids | Homovanillic acid              | 11.4<br>[8.4;15.2]     | 9.5 [7.6;12.4]         | 10.0 [8.6;12.3]        | 14.2<br>[11.1;19.8]    | 14.6<br>[12.5;17.4]    | 15.2 [11.4;18.5]         | <0.001  | 175  | 0.46  |
|                       | Hydroxycinnamic acids     | Ferulic acid                   | 21.4<br>[14.6;37.3]    | 16.7<br>[11.9;23.8]    | 23.4<br>[17.3;36.0]    | 24.5<br>[15.0;32.2]    | 32.9<br>[19.2;50.2]    | 29.7 [24.7;38.7]         | <0.001  | 175  | 0.24  |
| Hydroxycinnamic acids | Caffeic acid              | 4.6 [2.6;8.2]                  | 3.8 [1.9;6.3]          | 5.6 [3.6;8.4]          | 6.3 [3.9;8.9]          | 6.7 [3.0;12.2]         | 5.5 [3.6;9.8]          | 0.003                    | 175     | 0.49 |       |

Median and interquartile range; p-value derived from Kruskal-Wallis test. All p-values were corrected for multiple testing by Benjamini-Hochberg method.

OMN: omnivore; PVG: pro-vegetarian; PCV: pesco-vegetarian; OVL: ovo-lacto-vegetarian; VGN: vegan; FC: Folin-Ciocalteu method; LLOQ: limit of quantification.

Polyphenol-containing supplements were defined as supplements including plant extracts and other products with antioxidant compounds; vitamin C, vitamin D, and multivitamins were also considered within this category

**Table S28.** Urine (poly)phenol concentrations (ng/mL) by type of diet excluding the participants with metabolite concentration lower than LLOQ.

| Class                  | Subclass                  | Urine biomarker                | ALL<br>n=200         | OMN<br>n=98          | PVG<br>n=19           | PCV<br>n=16          | OVL<br>n=45           | VGN<br>n=22              | p-value | N    | <LLOQ |
|------------------------|---------------------------|--------------------------------|----------------------|----------------------|-----------------------|----------------------|-----------------------|--------------------------|---------|------|-------|
| Flavonoids             | Flavanones                | Naringenin                     | 25.5<br>[7.7;78.5]   | 16.6<br>[4.0;44.8]   | 48.9<br>[14.2;167.8]  | 17.0 [9.3;45.7]      | 29.1<br>[14.0;73.1]   | 133.6<br>[42.8;430.1]    | <0.001  | 198  | 0.51  |
|                        | Flavanones                | Hesperetin                     | 6.7 [1.8;85.2]       | 3.9 [1.4;35.7]       | 39.1<br>[2.6;280.6]   | 17.0 [3.5;75.6]      | 3.6 [1.5;33.9]        | 52.2<br>[3.2;344.0]      | 0.020   | 164  | 0.68  |
|                        | Isoflavonoids             | Daidzein                       | 17.3<br>[2.9;319.8]  | 4.3 [2.1;17.8]       | 24.4 [6.3;88.8]       | 34.0<br>[4.0;133.9]  | 168.1<br>[5.5;572.3]  | 1424.0<br>[685.1;2152.9] | <0.001  | 177  | 0.84  |
|                        | Isoflavonoids             | Genistein                      | 14.6<br>[2.8;139.0]  | 3.8 [1.6;13.2]       | 19.7 [4.8;43.0]       | 19.1<br>[5.8;135.7]  | 76.9<br>[18.2;311.2]  | 861.9<br>[578.3;3527.7]  | <0.001  | 192  | 0.49  |
|                        | Isoflavonoids             | Equol                          | 2.4 [1.4;5.3]        | 2.0 [1.2;3.4]        | 2.4 [1.4;14.2]        | 3.0 [1.6;4.4]        | 2.7 [1.6;8.3]         | 178.2<br>[15.7;526.8]    | 0.005   | 174  | 0.49  |
| Lignans                | Lignans                   | Enterolactone                  | 86.5<br>[36.0;282.5] | 55.4<br>[24.5;157.2] | 150.0<br>[74.5;261.2] | 71.7<br>[47.6;208.4] | 133.8<br>[58.4;414.7] | 460.4<br>[91.8;1129.6]   | <0.001  | 198  | 0.62  |
|                        | Lignans                   | Enterodiol                     | 26.2<br>[11.7;75.2]  | 14.0<br>[7.8;31.7]   | 26.1<br>[15.4;64.7]   | 28.1<br>[17.3;86.6]  | 47.8<br>[23.8;146.2]  | 99.1<br>[58.2;423.3]     | <0.001  | 196  | 0.48  |
| Other<br>(poly)phenols | Tyrosols                  | Hydroxytyrosol                 | 22.8<br>[10.9;39.1]  | 17.7<br>[9.3;29.7]   | 46.5<br>[35.4;68.8]   | 26.4<br>[15.2;57.6]  | 27.4<br>[13.6;36.7]   | 30.1<br>[16.4;41.1]      | <0.001  | 198  | 1.16  |
|                        | Tyrosols                  | Tyrosol                        | 13.5<br>[11.4;19.7]  | 12.8<br>[10.9;15.4]  | 22.8<br>[13.7;36.3]   | 15.1<br>[12.4;16.9]  | 13.3<br>[11.8;20.3]   | 15.2<br>[12.2;22.8]      | 0.005   | 198  | 0.58  |
| Phenolic<br>acids      | Hydroxybenzoic acids      | Protocatechuic acid            | 2.0 [1.1;3.6]        | 1.3 [0.9;2.4]        | 1.8 [1.0;3.1]         | 2.2 [2.1;3.4]        | 2.8 [1.8;4.0]         | 4.5 [3.4;6.5]            | <0.001  | 198  | 0.24  |
|                        | Hydroxyphenylacetic acids | 3,4-Dihydroxyphenylacetic acid | 1.2 [0.7;1.9]        | 0.8 [0.7;1.2]        | 1.2 [0.7;1.8]         | 1.2 [0.9;2.2]        | 1.6 [1.2;3.8]         | 1.6 [1.0;2.9]            | <0.001  | 168  | 0.54  |
|                        | Hydroxybenzoic acids      | 4-Hydroxybenzoic acid          | 11.1<br>[8.1;15.1]   | 8.8 [7.2;12.0]       | 11.2 [8.6;13.2]       | 13.1 [9.0;20.2]      | 12.6<br>[9.5;15.2]    | 16.0<br>[13.4;20.9]      | <0.001  | 198  | 0.24  |
|                        | Hydroxybenzoic acids      | 3-Hydroxybenzoic acid          | 0.5 [0.4;0.9]        | 0.4 [0.3;0.7]        | 0.5 [0.4;0.9]         | 0.6 [0.5;1.2]        | 0.7 [0.5;1.0]         | 0.7 [0.5;1.1]            | 0.001   | 173  | 0.24  |
|                        | Hydroxyphenylacetic acids | 3-Hydroxyphenylacetic acid     | 76.6<br>[61.6;92.4]  | 71.2<br>[58.4;84.5]  | 71.9<br>[60.0;82.9]   | 85.4<br>[66.8;97.6]  | 87.1<br>[68.8;110.9]  | 81.8<br>[71.2;118.6]     | <0.001  | 199  | 0.30  |
|                        | Hydroxycinnamic acids     | m-Coumaric acid                | 3.2 [1.4;7.5]        | 1.9 [0.9;4.2]        | 3.3 [1.3;10.3]        | 3.5 [3.0;6.3]        | 5.6 [3.0;9.1]         | 8.8 [3.0;16.5]           | <0.001  | 180  | 0.24  |
|                        | Hydroxycinnamic acids     | p-Coumaric acid                | 4.5 [3.3;6.8]        | 3.6 [2.8;5.1]        | 3.9 [3.2;8.4]         | 5.4 [4.6;6.7]        | 5.6 [4.2;8.1]         | 6.4 [5.2;10.0]           | <0.001  | 198  | 0.25  |
|                        | Hydroxybenzoic acids      | Vanillic acid                  | 19.3<br>[10.6;29.7]  | 11.9<br>[8.8;20.3]   | 16.8<br>[10.6;34.4]   | 27.9<br>[14.9;43.8]  | 22.9<br>[17.6;41.2]   | 27.0<br>[24.3;44.6]      | <0.001  | 199  | 0.24  |
|                        | Hydroxyphenylacetic acids | Homovanillic acid              | 11.4<br>[8.7;15.1]   | 9.5 [7.9;12.3]       | 10.7 [9.0;13.7]       | 14.2<br>[11.1;19.8]  | 14.0<br>[12.3;17.3]   | 12.4 [9.9;17.3]          | <0.001  | 198  | 0.46  |
|                        | Hydroxycinnamic acids     | Ferulic acid                   | 23.0<br>[15.0;37.3]  | 17.8<br>[12.0;24.0]  | 23.4<br>[18.1;33.3]   | 24.5<br>[15.0;32.2]  | 32.3<br>[21.4;49.3]   | 33.6<br>[25.4;43.0]      | <0.001  | 199  | 0.24  |
| Hydroxycinnamic acids  | Caffeic acid              | 5.0 [2.9;8.9]                  | 4.2 [2.1;6.6]        | 5.6 [2.8;8.9]        | 6.3 [3.9;8.9]         | 7.1 [3.4;12.1]       | 6.3 [3.8;10.1]        | 0.003                    | 195     | 0.49 |       |

Median and interquartile range; p-value derived from Kruskal-Wallis test. All p-values were corrected for multiple testing by Benjamini-Hochberg method. OMN: omnivore; PVG: pro-vegetarian; PCV: pesco-vegetarian; OVL: ovo-lacto-vegetarian; VGN: vegan; FC: Folin-Ciocalteu method; <LLOQ: limit of quantification. N: represents the number of participants with metabolite concentration higher than LLOQ.

**Table S29.** Urine (poly)phenol concentrations (ng/mL) by type of diet substituting the participants with metabolite concentration lower than LLOQ by  $LLOQ/\sqrt{2}$

| Class                  | Subclass                  | Urine biomarker                | ALL<br>n=200         | OMN<br>n=98          | PVG<br>n=19           | PCV<br>n=16          | OVL<br>n=45           | VGN<br>n=22              | p-value | N    | <LLOQ |
|------------------------|---------------------------|--------------------------------|----------------------|----------------------|-----------------------|----------------------|-----------------------|--------------------------|---------|------|-------|
| Flavonoids             | Flavanones                | Naringenin                     | 24.5<br>[7.5;76.2]   | 16.0<br>[3.7;43.3]   | 48.9<br>[14.2;167.8]  | 17.0 [9.3;45.7]      | 29.1<br>[14.0;73.1]   | 133.6<br>[42.8;430.1]    | <0.001  | 200  | 0.51  |
|                        | Flavanones                | Hesperetin                     | 2.9 [1.0;40.0]       | 1.9 [0.7;16.1]       | 34.5<br>[2.4;243.9]   | 12.5 [2.2;53.8]      | 2.6 [1.0;15.2]        | 52.2<br>[3.2;344.0]      | 0.001   | 200  | 0.68  |
|                        | Isoflavonoids             | Daidzein                       | 11.4<br>[2.1;220.1]  | 2.7 [1.1;13.2]       | 13.1 [3.4;73.2]       | 34.0<br>[4.0;133.9]  | 168.1<br>[5.5;572.3]  | 1424.0<br>[685.1;2152.9] | <0.001  | 200  | 0.84  |
|                        | Isoflavonoids             | Genistein                      | 12.4<br>[2.5;127.6]  | 3.0 [1.2;12.6]       | 19.7 [4.8;43.0]       | 19.1<br>[5.8;135.7]  | 76.9<br>[18.2;311.2]  | 853.9<br>[286.4;3376.6]  | <0.001  | 200  | 0.49  |
|                        | Isoflavonoids             | Equol                          | 1.9 [1.1;4.1]        | 1.7 [1.0;3.3]        | 2.4 [1.2;11.5]        | 2.8 [1.6;4.1]        | 2.2 [1.5;6.1]         | 0.5 [0.3;221.0]          | 0.131   | 200  | 0.49  |
| Lignans                | Lignans                   | Enterolactone                  | 85.7<br>[34.6;279.5] | 55.4<br>[24.5;157.2] | 150.0<br>[74.5;261.2] | 71.7<br>[47.6;208.4] | 118.2<br>[55.4;400.4] | 434.0<br>[73.3;1102.8]   | 0.002   | 200  | 0.62  |
|                        | Lignans                   | Enterodiol                     | 25.9<br>[11.0;73.8]  | 13.9<br>[7.6;31.6]   | 26.1<br>[15.4;64.7]   | 28.1<br>[17.3;86.6]  | 40.0<br>[20.5;132.4]  | 99.1<br>[58.2;423.3]     | <0.001  | 200  | 0.48  |
| Other<br>(poly)phenols | Tyrosols                  | Hydroxytyrosol                 | 22.1<br>[10.8;38.7]  | 16.9<br>[8.9;29.3]   | 46.5<br>[35.4;68.8]   | 15.2<br>[15.2;57.6]  | 27.4<br>[13.6;36.7]   | 30.1<br>[16.4;41.1]      | <0.001  | 200  | 1.16  |
|                        | Tyrosols                  | Tyrosol                        | 13.5<br>[11.4;19.6]  | 12.7<br>[10.8;15.3]  | 22.8<br>[13.7;36.3]   | 15.1<br>[12.4;16.9]  | 13.3<br>[11.8;20.3]   | 15.2<br>[12.2;22.8]      | 0.003   | 200  | 0.58  |
| Phenolic<br>acids      | Hydroxybenzoic acids      | Protocatechuic acid            | 1.9 [1.1;3.5]        | 1.3 [0.9;2.4]        | 1.8 [1.0;3.1]         | 2.2 [2.1;3.4]        | 2.8 [1.8;4.0]         | 4.5 [3.4;6.5]            | <0.001  | 200  | 0.24  |
|                        | Hydroxyphenylacetic acids | 3,4-Dihydroxyphenylacetic acid | 1.0 [0.6;1.7]        | 0.7 [0.4;1.0]        | 1.2 [0.7;1.8]         | 1.2 [0.9;2.2]        | 1.6 [1.1;3.7]         | 1.6 [0.9;2.7]            | <0.001  | 200  | 0.54  |
|                        | Hydroxybenzoic acids      | 4-Hydroxybenzoic acid          | 10.9<br>[8.0;15.0]   | 8.7 [7.0;11.9]       | 11.2 [8.6;13.2]       | 13.1 [9.0;20.2]      | 12.6<br>[9.5;15.2]    | 16.0<br>[13.4;20.9]      | <0.001  | 200  | 0.24  |
|                        | Hydroxybenzoic acids      | 3-Hydroxybenzoic acid          | 0.5 [0.3;0.8]        | 0.4 [0.3;0.7]        | 0.5 [0.3;0.9]         | 0.6 [0.5;1.2]        | 0.7 [0.4;1.0]         | 0.6 [0.4;1.1]            | 0.002   | 200  | 0.24  |
|                        | Hydroxyphenylacetic acids | 3-Hydroxyphenylacetic acid     | 76.1<br>[61.3;92.3]  | 71.2<br>[58.4;84.5]  | 71.9<br>[60.0;82.9]   | 85.4<br>[66.8;97.6]  | 86.7<br>[68.2;110.0]  | 81.8<br>[71.2;118.6]     | <0.001  | 200  | 0.30  |
|                        | Hydroxycinnamic acids     | m-Coumaric acid                | 2.8 [1.0;6.4]        | 1.6 [0.6;3.6]        | 3.3 [1.3;10.3]        | 3.4 [2.6;5.0]        | 5.6 [2.9;8.8]         | 5.0 [2.0;15.6]           | <0.001  | 200  | 0.24  |
|                        | Hydroxycinnamic acids     | p-Coumaric acid                | 4.5 [3.3;6.8]        | 3.6 [2.7;5.1]        | 3.9 [3.2;8.4]         | 5.4 [4.6;6.7]        | 5.6 [4.2;8.1]         | 6.4 [5.2;10.0]           | <0.001  | 200  | 0.25  |
|                        | Hydroxybenzoic acids      | Vanillic acid                  | 19.0<br>[10.5;29.6]  | 11.8<br>[8.7;20.1]   | 16.8<br>[10.6;34.4]   | 27.9<br>[14.9;43.8]  | 22.9<br>[17.6;41.2]   | 27.0<br>[24.3;44.6]      | <0.001  | 200  | 0.24  |
|                        | Hydroxyphenylacetic acids | Homovanillic acid              | 11.3<br>[8.7;15.0]   | 9.5 [7.8;12.2]       | 10.7 [9.0;13.7]       | 14.2<br>[11.1;19.8]  | 14.0<br>[12.3;17.3]   | 12.4 [9.9;17.3]          | <0.001  | 200  | 0.46  |
|                        | Hydroxycinnamic acids     | Ferulic acid                   | 22.9<br>[14.9;37.1]  | 17.2<br>[11.9;24.0]  | 23.4<br>[18.1;33.3]   | 24.5<br>[15.0;32.2]  | 32.3<br>[21.4;49.3]   | 33.6<br>[25.4;43.0]      | <0.001  | 200  | 0.24  |
| Hydroxycinnamic acids  | Caffeic acid              | 4.9 [2.7;8.8]                  | 3.9 [1.9;6.4]        | 5.6 [2.8;8.9]        | 6.3 [3.9;8.9]         | 7.1 [3.4;12.1]       | 6.3 [3.8;10.1]        | <0.001                   | 200     | 0.49 |       |

Median and interquartile range; p-value derived from Kruskal-Wallis test. All p-values were corrected for multiple testing by Benjamini-Hochberg method. OMN: omnivore; PVG: pro-vegetarian; PCV: pesco-vegetarian; OVL: ovo-lacto-vegetarian; VGN: vegan; FC: Folin-Ciocalteu method; <LLOQ: limit of quantification. N: represents the number of participants.

**Figure S1.** Number of clusters selection graph: silhouette method.

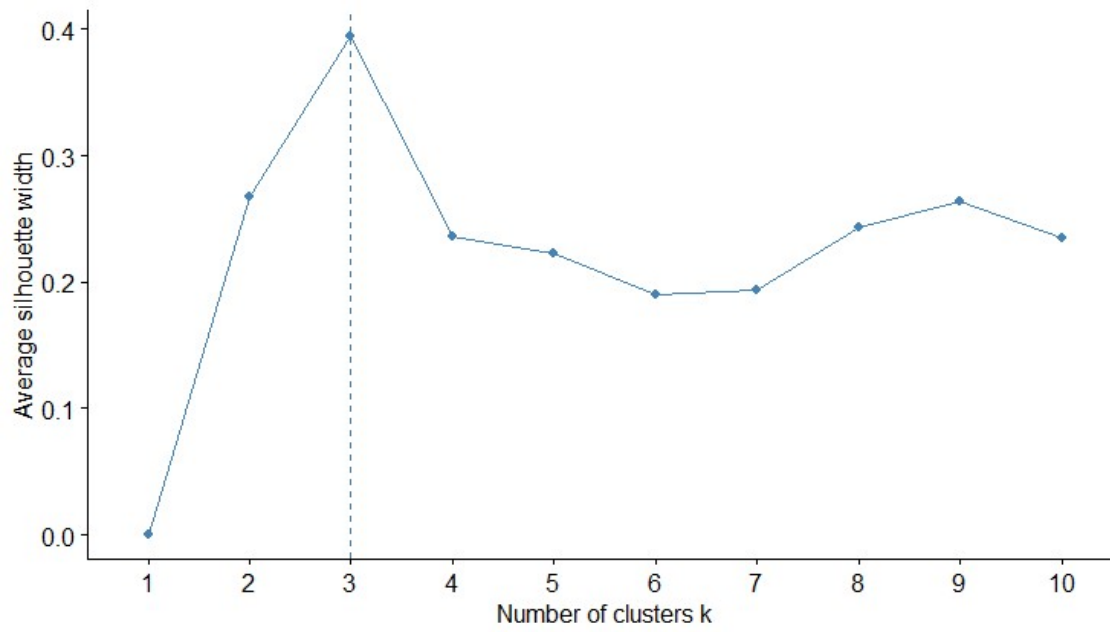

**Figure S2.** Number of clusters selection graph: elbow method.

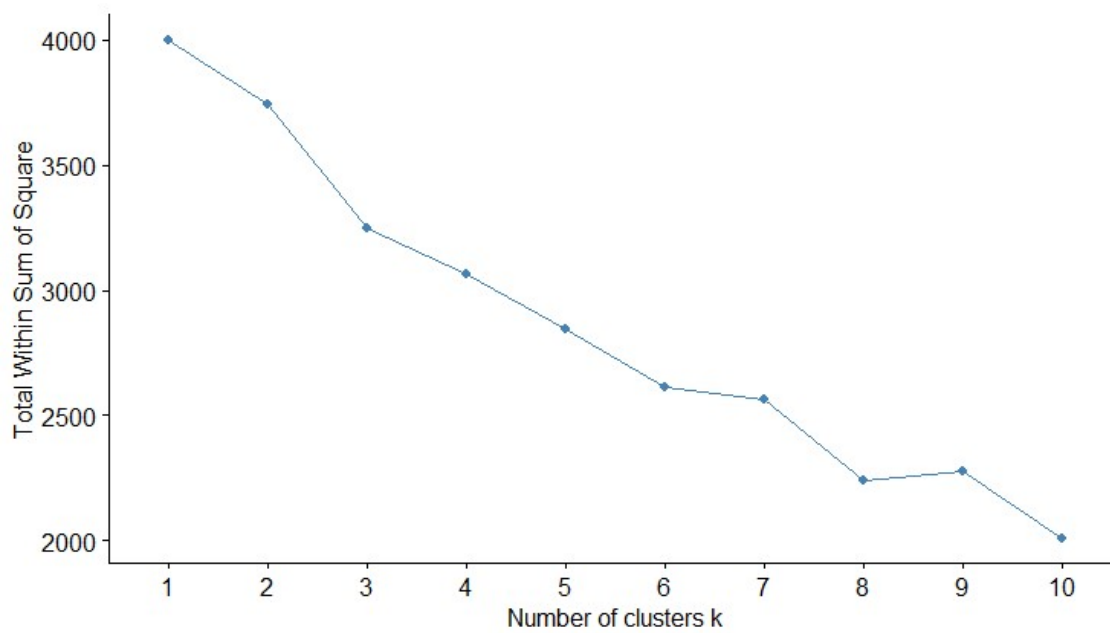

**Figure S3.** Correlations between the intake of selected foods rich in polyphenols and urinary polyphenols (U) in the urine sample study population (n = 200).

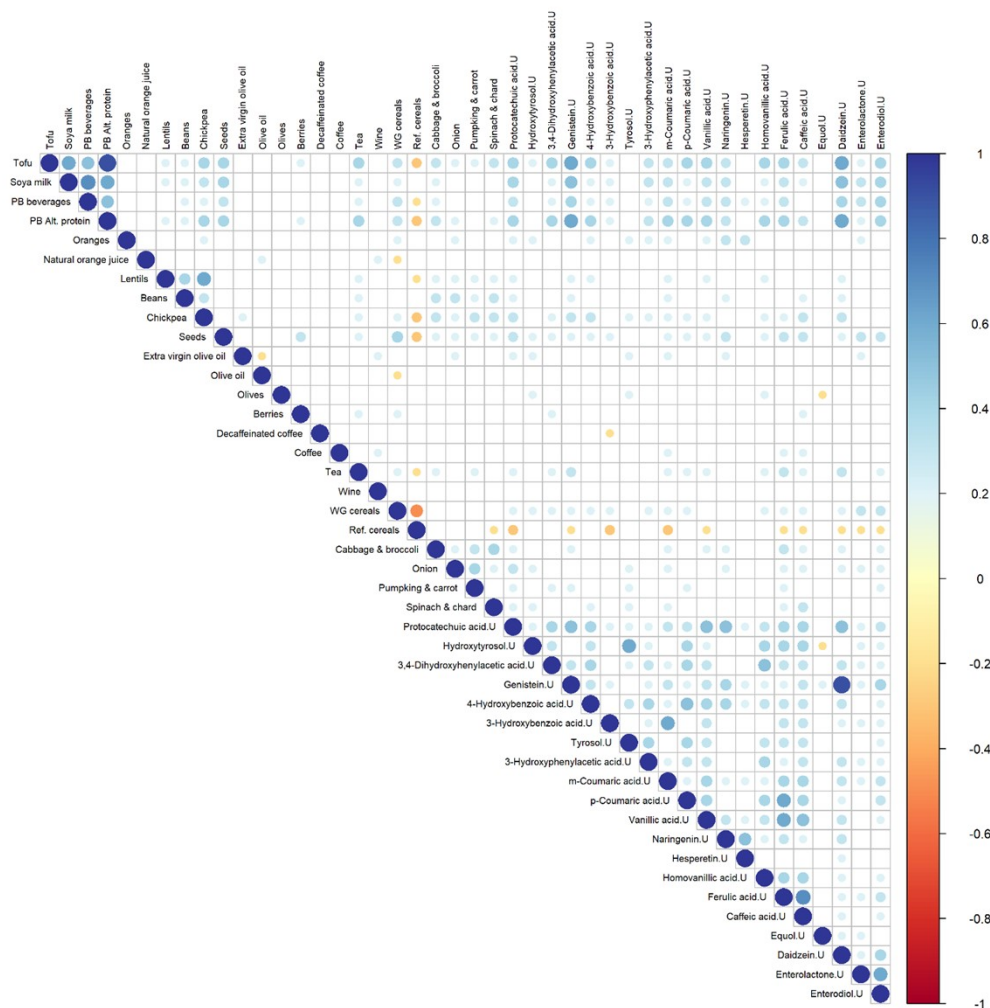

Correlation diagram, where Spearman correlation coefficients for correlations between selected foods and the urine metabolites are shown. Spearman correlations superior to  $|0.2|$  presented. Size of the circle represents the weight of the correlation. Positive correlations are indicated in blue
